# Supplementary material for: Usability of rectal swabs for microbiome sampling in a cohort study of hematological and oncological patients
Source: PubMed Central journal article supplement (PMC6464231; doi:10.1371/journal.pone.0215428), 2019-04-15

## S2 Fig: Impact of Cary-Blair medium on microbiota profiles

**A**

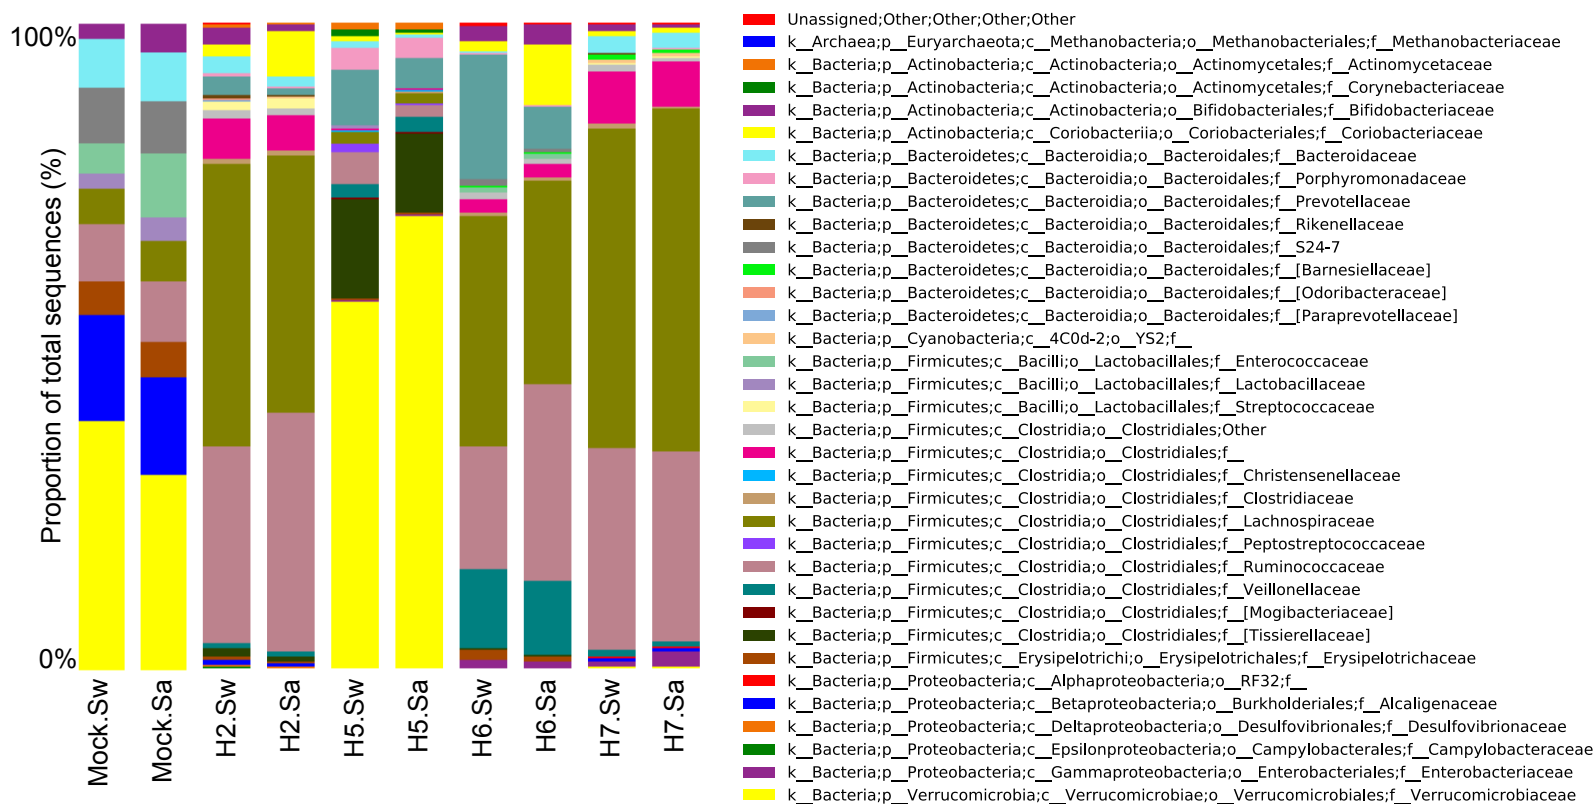

**B**

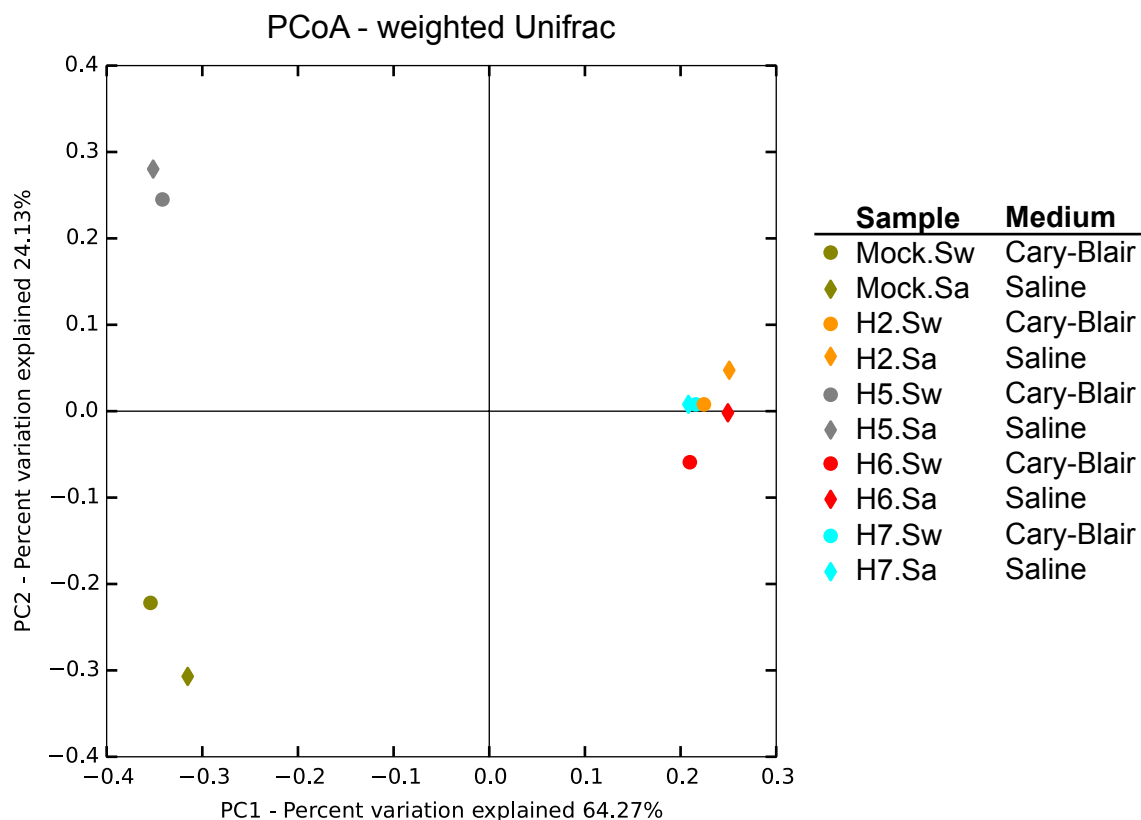

Supplement: pone.0215428.s002.pdf [file pone.0215428.s002.pdf]
