# Supplementary material for: Usability of rectal swabs for microbiome sampling in a cohort study of hematological and oncological patients
Source: PLOS journal article supplement (doi:10.1371/journal.pone.0215428), 2019-04-15
Supplement: S1 (10.1371/journal.pone.0215428.s001) [file journal.pone.0215428.s001.pdf]

# S1 Fig: Reproducibility and consistency of microbiota profiles

**A**

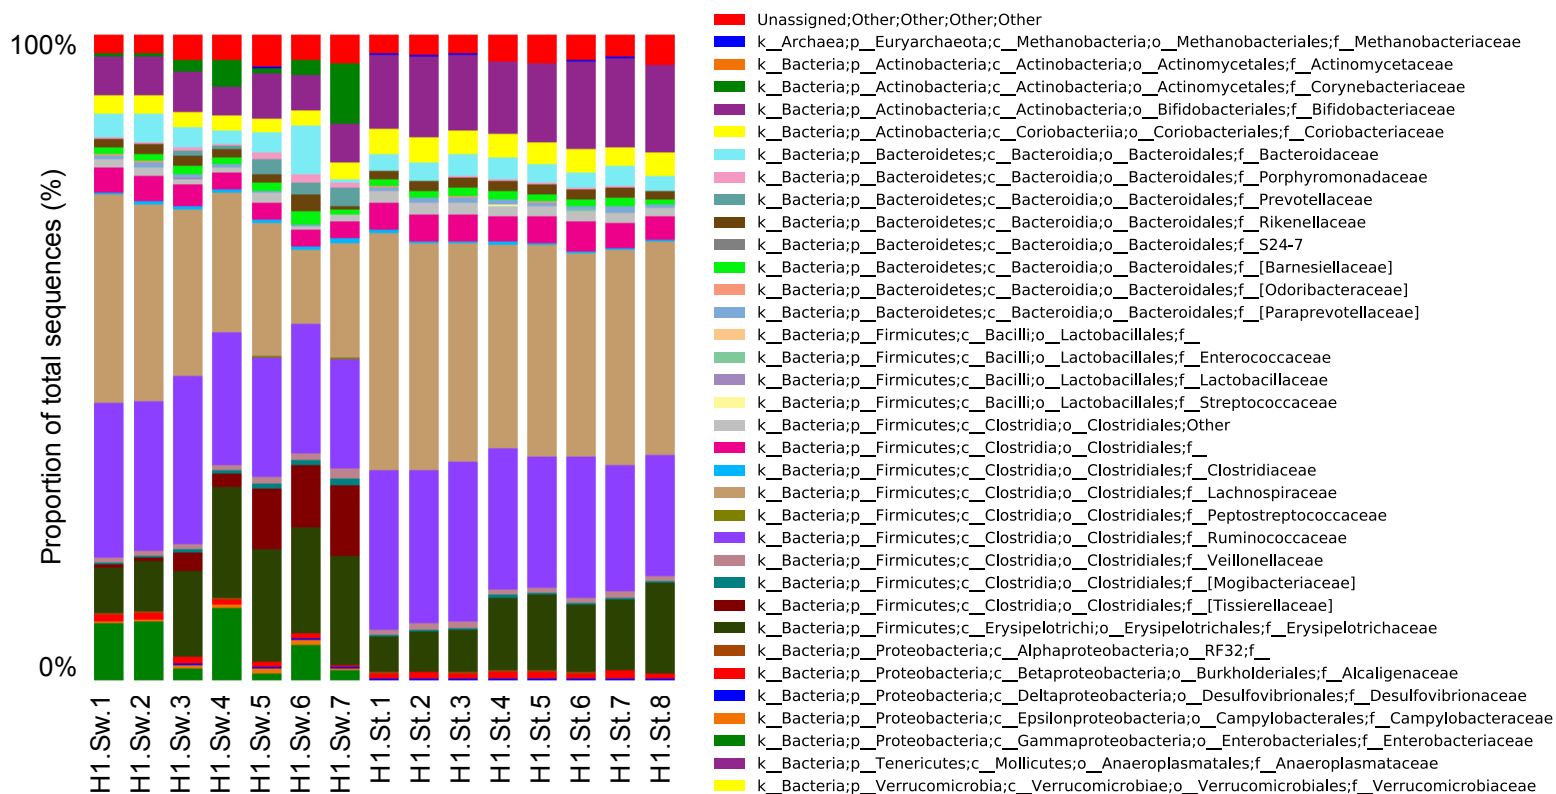

**B**

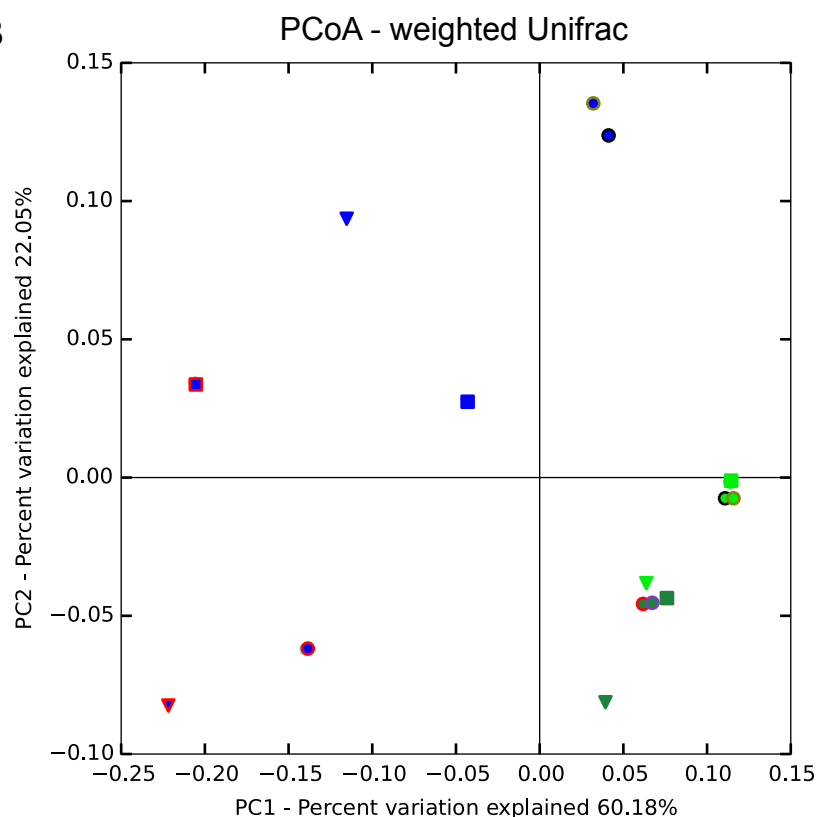

| Sample    | Sampling time | Technical replicate | PCR replicate |
|-----------|---------------|---------------------|---------------|
| ● H1.Sw.1 | 1             | 3                   | 1             |
| ● H1.Sw.2 | 1             | 3                   | 1             |
| ■ H1.Sw.3 | 1             | 1                   |               |
| ▼ H1.Sw.4 | 1             | 2                   |               |
| ● H1.Sw.5 | 2             | 3                   |               |
| ■ H1.Sw.6 | 2             | 1                   |               |
| ▼ H1.Sw.7 | 2             | 2                   |               |
| ● H1.St.1 | 1             | 3                   | 2             |
| ● H1.St.2 | 1             | 3                   | 2             |
| ■ H1.St.3 | 1             | 1                   |               |
| ▼ H1.St.4 | 1             | 2                   |               |
| ● H1.St.5 | 1-4h          | 3                   | 3             |
| ● H1.St.6 | 1-4h          | 3                   | 3             |
| ■ H1.St.7 | 1-4h          | 1                   |               |
| ▼ H1.St.8 | 1-4h          | 2                   |               |
