# Supplementary material for: Usability of rectal swabs for microbiome sampling in a cohort study of hematological and oncological patients
Source: PLoS One. 2019 Apr 15;14(4):e0215428. doi: 10.1371/journal.pone.0215428 (PMC6464231; doi:10.1371/journal.pone.0215428)
Supplement: S1 Table — (XLSX) [file pone.0215428.s005.xlsx]

## Sheet: Sheet1
S1 Table
Sample IDa	Subject	Sample type	Sampling time	Storage before freezing	Technical replicate	PCR replicate	[gDNA] ng/µl	[amplicon] ng/µl	Sequence countb
P.Sw	patient	swab	-	snap-frozen	-	-	6.491	5.924	89155	aSamples are named according to the variables used:
P.St	patient	stool	-	snap-frozen	-	-	12.569	9.213	122950		P - patient; H - healthy donor
H1.Sw.1	healthy 1	swab	1	snap-frozen	3	1	12.431	13.132	99675		Sw - swab; St - stool; Sa - saline
H1.Sw.2	healthy 1	swab	1	snap-frozen	3	1		6.442	134256	bAfter read pre-processing and removal of chimeric sequences
H1.Sw.3	healthy 1	swab	1	snap-frozen	1	-	6.998	10.873	93112
H1.Sw.4	healthy 1	swab	1	snap-frozen	2	-	2.341	10.059	129129
H1.Sw.5	healthy 1	swab	2	snap-frozen	3	-	25.876	13.129	110620
H1.Sw.6	healthy 1	swab	2	snap-frozen	1	-	7.342	9.023	121788
H1.Sw.7	healthy 1	swab	2	snap-frozen	2	-	2.307	11.405	60960
H1.St.1	healthy 1	stool	1	snap-frozen	3	2	44.703	11.824	88830
H1.St.2	healthy 1	stool	1	snap-frozen	3	2		2.522	127419
H1.St.3	healthy 1	stool	1	snap-frozen	1	-	40.716	14.241	100512
H1.St.4	healthy 1	stool	1	snap-frozen	2	-	67.665	6.85	147936
H1.St.5	healthy 1	stool	1	RT, 4h	3	3	51.209	15.012	92064
H1.St.6	healthy 1	stool	1	RT, 4h	3	3		10.333	70377
H1.St.7	healthy 1	stool	1	RT, 4h	1	-	42.079	8.532	109880
H1.St.8	healthy 1	stool	1	RT, 4h	2	-	73.873	13.379	96704
H2.Sw	healthy 2	swab	-	snap-frozen	-	-	27.501	2.23	124372
H2.St	healthy 2	stool	-	snap-frozen	-	-	53.855	9.52	77403
H2.Sa	healthy 2	saline	-	snap-frozen	-	-	1.803	11.65	415602
H3.Sw	healthy 3	swab	-	snap-frozen	-	-	64.34	3.19	96195
H3.St	healthy 3	stool	-	snap-frozen	-	-	62.632	1.7	26281
H4.Sw	healthy 4	swab	-	snap-frozen	-	-	77.676	1	12490
H4.St	healthy 4	stool	-	snap-frozen	-	-	89.357	1.08	46777
H5.Sw	healthy 5	swab	-	snap-frozen	-	-	3.563	4.94	100508
H5.St	healthy 5	stool	-	snap-frozen	-	-	28.122	0.93	26951
H5.Sa	healthy 5	saline	-	snap-frozen	-	-	16.995	3.99	43564
H6.Sw	healthy 6	swab	-	snap-frozen	-	-	17.328	2.66	79821
H6.St	healthy 6	stool	-	snap-frozen	-	-	139.293	1.58	48796
H6.Sa	healthy 6	saline	-	snap-frozen	-	-	2.785	2.27	70987
H7.Sw	healthy 7	swab	-	snap-frozen	-	-	21.687	1.4	45497
H7.St	healthy 7	stool	-	snap-frozen	-	-	135.721	1.9	28350
H7.Sa	healthy 7	saline	-	snap-frozen	-	-	24.085	3.74	144663
Mock.Sw	-	swab	-	-	-	-	0.727	5.2	29314
Mock.Sa	-	saline	-	-	-	-	0.231	7.95	57195
