# Supplementary material for: Usability of rectal swabs for microbiome sampling in a cohort study of hematological and oncological patients
Source: PLoS One. 2019 Apr 15;14(4):e0215428. doi: 10.1371/journal.pone.0215428 (PMC6464231; doi:10.1371/journal.pone.0215428)
Supplement: S2 Table — Red: Illumina adapter sequence. Black: variability region. Green: specific sample barcode. Blue: forward primer targeting the specific 16S rRNA regions V3-V4. Purple: reverse primer targeting the specific 16S rRNA region V3-V4. (XLSX) [file pone.0215428.s006.xlsx]

## Sheet: Primers
S2 Table: Dual-indexed PCR amplification primer sequences
Name	Sequence (5'->3')
F_01	AATGATACGGCGACCACCGAGATCTACACTCTTTCCCTACACGACGCTCTTCCGATCTNNNAAACTGCCGAATCCTACGGGNBGCASCAG
F_02	AATGATACGGCGACCACCGAGATCTACACTCTTTCCCTACACGACGCTCTTCCGATCTNNNNAATTCCGTGACGCCTACGGGNBGCASCAG
F_03	AATGATACGGCGACCACCGAGATCTACACTCTTTCCCTACACGACGCTCTTCCGATCTNNNNNAGTATATCCTACCCTACGGGNBGCASCAG
F_04	AATGATACGGCGACCACCGAGATCTACACTCTTTCCCTACACGACGCTCTTCCGATCTNNNNNNCCGAAACCGACTCCTACGGGNBGCASCAG
F_05	AATGATACGGCGACCACCGAGATCTACACTCTTTCCCTACACGACGCTCTTCCGATCTNNNCTTAATCCAGGTCCTACGGGNBGCASCAG
F_06	AATGATACGGCGACCACCGAGATCTACACTCTTTCCCTACACGACGCTCTTCCGATCTNNNNGCATACAGTAATCCTACGGGNBGCASCAG
F_07	AATGATACGGCGACCACCGAGATCTACACTCTTTCCCTACACGACGCTCTTCCGATCTNNNNNTCCGCCTCAGAACCTACGGGNBGCASCAG
F_08	AATGATACGGCGACCACCGAGATCTACACTCTTTCCCTACACGACGCTCTTCCGATCTNNNNNNTTTAAGCGACCTCCTACGGGNBGCASCAG
R_01	CAAGCAGAAGACGGCATACGAGATGTGACTGGAGTTCAGACGTGTGCTCTTCCGATCTNNNTAAGGCAGAGGTGACTACNVGGGTATCTAATCC
R_02	CAAGCAGAAGACGGCATACGAGATGTGACTGGAGTTCAGACGTGTGCTCTTCCGATCTNNNNCGAATACGAACAGACTACNVGGGTATCTAATCC
R_03	CAAGCAGAAGACGGCATACGAGATGTGACTGGAGTTCAGACGTGTGCTCTTCCGATCTNNNNNCCTGCTACACTTGACTACNVGGGTATCTAATCC
R_04	CAAGCAGAAGACGGCATACGAGATGTGACTGGAGTTCAGACGTGTGCTCTTCCGATCTNNNNNNGCCGCAGAATATGACTACNVGGGTATCTAATCC
R_05	CAAGCAGAAGACGGCATACGAGATGTGACTGGAGTTCAGACGTGTGCTCTTCCGATCTNNNAGATATGTAGACGACTACNVGGGTATCTAATCC
R_06	CAAGCAGAAGACGGCATACGAGATGTGACTGGAGTTCAGACGTGTGCTCTTCCGATCTNNNNACCTCAAATTAGGACTACNVGGGTATCTAATCC
R_07	CAAGCAGAAGACGGCATACGAGATGTGACTGGAGTTCAGACGTGTGCTCTTCCGATCTNNNNNTTAATTTCTAAAGACTACNVGGGTATCTAATCC
R_08	CAAGCAGAAGACGGCATACGAGATGTGACTGGAGTTCAGACGTGTGCTCTTCCGATCTNNNNNNAGCGGCATGATTGACTACNVGGGTATCTAATCC
R_09	CAAGCAGAAGACGGCATACGAGATGTGACTGGAGTTCAGACGTGTGCTCTTCCGATCTNNNGCCTCGGCGCGAGACTACNVGGGTATCTAATCC
R_10	CAAGCAGAAGACGGCATACGAGATGTGACTGGAGTTCAGACGTGTGCTCTTCCGATCTNNNNATCCTGCCATTCGACTACNVGGGTATCTAATCC
R_11	CAAGCAGAAGACGGCATACGAGATGTGACTGGAGTTCAGACGTGTGCTCTTCCGATCTNNNNNTATTCTTGACTAGACTACNVGGGTATCTAATCC
R_12	CAAGCAGAAGACGGCATACGAGATGTGACTGGAGTTCAGACGTGTGCTCTTCCGATCTNNNNNNAGCAAGGAATAAGACTACNVGGGTATCTAATCC
FW_ctrl_01	AATGATACGGCGACCACCGAGATCTACACTCTTTCCCTACACGACGCTCTTCCGATCTNNNAATTGACAACTGCCTACGGGNBGCASCAG
RV_ctrl_01	CAAGCAGAAGACGGCATACGAGATGTGACTGGAGTTCAGACGTGTGCTCTTCCGATCTNNNNNNCTTGTAAATATAGACTACNVGGGTATCTAATCC
FW_ctrl_02	AATGATACGGCGACCACCGAGATCTACACTCTTTCCCTACACGACGCTCTTCCGATCTNNNNTCCGTCGAACGACCTACGGGNBGCASCAG
RV_ctrl_02	CAAGCAGAAGACGGCATACGAGATGTGACTGGAGTTCAGACGTGTGCTCTTCCGATCTNNNNNCCTCTCACATGGGACTACNVGGGTATCTAATCC
FW_ctrl_03	AATGATACGGCGACCACCGAGATCTACACTCTTTCCCTACACGACGCTCTTCCGATCTNNNNNGCCAGTTCAGTACCTACGGGNBGCASCAG
RV_ctrl_03	CAAGCAGAAGACGGCATACGAGATGTGACTGGAGTTCAGACGTGTGCTCTTCCGATCTNNNNAAACTGTAAGGCGACTACNVGGGTATCTAATCC
FW_ctrl_04	AATGATACGGCGACCACCGAGATCTACACTCTTTCCCTACACGACGCTCTTCCGATCTNNNNNNATACAAACGCCTCCTACGGGNBGCASCAG
RV_ctrl_04	CAAGCAGAAGACGGCATACGAGATGTGACTGGAGTTCAGACGTGTGCTCTTCCGATCTNNNTTGTTGACCAATGACTACNVGGGTATCTAATCC
FW_ctrl_05	AATGATACGGCGACCACCGAGATCTACACTCTTTCCCTACACGACGCTCTTCCGATCTNNNGCCTAATTCACTCCTACGGGNBGCASCAG
RV_ctrl_05	CAAGCAGAAGACGGCATACGAGATGTGACTGGAGTTCAGACGTGTGCTCTTCCGATCTNNNNNNAGCAAACCAGACGACTACNVGGGTATCTAATCC
FW_ctrl_06	AATGATACGGCGACCACCGAGATCTACACTCTTTCCCTACACGACGCTCTTCCGATCTNNNNACGAATCAACTACCTACGGGNBGCASCAG
RV_ctrl_06	CAAGCAGAAGACGGCATACGAGATGTGACTGGAGTTCAGACGTGTGCTCTTCCGATCTNNNNNTTAACCTACAATGACTACNVGGGTATCTAATCC
FW_ctrl_07	AATGATACGGCGACCACCGAGATCTACACTCTTTCCCTACACGACGCTCTTCCGATCTNNNNNAGCTCTTCAAACCCTACGGGNBGCASCAG
RV_ctrl_07	CAAGCAGAAGACGGCATACGAGATGTGACTGGAGTTCAGACGTGTGCTCTTCCGATCTNNNNGCGCTGATTCAAGACTACNVGGGTATCTAATCC
FW_ctrl_08	AATGATACGGCGACCACCGAGATCTACACTCTTTCCCTACACGACGCTCTTCCGATCTNNNNNNATGCGAGACAAACCTACGGGNBGCASCAG
RV_ctrl_08	CAAGCAGAAGACGGCATACGAGATGTGACTGGAGTTCAGACGTGTGCTCTTCCGATCTNNNTCAACATGTACTGACTACNVGGGTATCTAATCC
