# Supplementary material for: Usability of rectal swabs for microbiome sampling in a cohort study of hematological and oncological patients
Source: PLoS One. 2019 Apr 15;14(4):e0215428. doi: 10.1371/journal.pone.0215428 (PMC6464231; doi:10.1371/journal.pone.0215428)
Supplement: S3 Table — (XLSX) [file pone.0215428.s007.xlsx]

## Sheet: Info
S3_Table
Sample name	Run	Info	Number of sequences
empty1	1	sterile swab medium	13
empty2	1	sterile swab medium	5
empty3	2	sterile swab medium	189
neg.ctrl_PCR_2	2	PCR reagents	41
neg.ctrl_PCR_3	3	PCR reagents	49
neg.ctrl_PCR_4	4	PCR reagents	298
neg.ctrl_PCR_5	5	PCR reagents	92
neg.ctrl1	1	DNA extraction buffers	14
neg.ctrl2	1	DNA extraction buffers	0
neg.ctrl3	2	DNA extraction buffers	6
neg.ctrl4	2	DNA extraction buffers	18
neg.ctrl5	3	DNA extraction buffers	41
neg.ctrl6	3	DNA extraction buffers	30
neg.ctrl7	3	DNA extraction buffers	64
		MEAN	61.4286

## Sheet: Taxonomy
S3_Table
Sequence_ID	Taxonomy Silva	Kingdom	Phylum	Class	Order	Family	Genus	Species
empty3_1442354	k__Bacteria;p__[Thermi];c__Deinococci;o__Deinococcales;f__Deinococcaceae;g__Deinococcus;	Bacteria	[Thermi]	Deinococci	Deinococcales	Deinococcaceae	Deinococcus
empty3_2004212	k__Bacteria;p__[Thermi];c__Deinococci;o__Deinococcales;f__Deinococcaceae;g__Deinococcus;	Bacteria	[Thermi]	Deinococci	Deinococcales	Deinococcaceae	Deinococcus
empty3_2146290	k__Bacteria;p__[Thermi];c__Deinococci;o__Deinococcales;f__Deinococcaceae;g__Deinococcus;	Bacteria	[Thermi]	Deinococci	Deinococcales	Deinococcaceae	Deinococcus
empty3_2153915	k__Bacteria;p__[Thermi];c__Deinococci;o__Deinococcales;f__Deinococcaceae;g__Deinococcus;	Bacteria	[Thermi]	Deinococci	Deinococcales	Deinococcaceae	Deinococcus
neg.ctrl_PCR_2_3636013	k__Bacteria;p__Actinobacteria;c__Actinobacteria;o__Actinomycetales;f__Corynebacteriaceae;g__Corynebacterium;s__stationis;	Bacteria	Actinobacteria	Actinobacteria	Actinomycetales	Corynebacteriaceae	Corynebacterium	stationis
neg.ctrl_PCR_2_3884172	k__Bacteria;p__Actinobacteria;c__Actinobacteria;o__Actinomycetales;f__Corynebacteriaceae;g__Corynebacterium;s__stationis;	Bacteria	Actinobacteria	Actinobacteria	Actinomycetales	Corynebacteriaceae	Corynebacterium	stationis
neg.ctrl_PCR_3_4440344	k__Bacteria;p__Actinobacteria;c__Actinobacteria;o__Actinomycetales;f__Corynebacteriaceae;g__Corynebacterium;	Bacteria	Actinobacteria	Actinobacteria	Actinomycetales	Corynebacteriaceae	Corynebacterium
neg.ctrl_PCR_3_4709466	k__Bacteria;p__Actinobacteria;c__Actinobacteria;o__Actinomycetales;f__Corynebacteriaceae;g__Corynebacterium;	Bacteria	Actinobacteria	Actinobacteria	Actinomycetales	Corynebacteriaceae	Corynebacterium
neg.ctrl_PCR_3_5328196	k__Bacteria;p__Actinobacteria;c__Actinobacteria;o__Actinomycetales;f__Corynebacteriaceae;g__Corynebacterium;	Bacteria	Actinobacteria	Actinobacteria	Actinomycetales	Corynebacteriaceae	Corynebacterium
neg.ctrl_PCR_3_5543952	k__Bacteria;p__Actinobacteria;c__Actinobacteria;o__Actinomycetales;f__Corynebacteriaceae;g__Corynebacterium;	Bacteria	Actinobacteria	Actinobacteria	Actinomycetales	Corynebacteriaceae	Corynebacterium
neg.ctrl_PCR_3_6681744	k__Bacteria;p__Actinobacteria;c__Actinobacteria;o__Actinomycetales;f__Corynebacteriaceae;g__Corynebacterium;	Bacteria	Actinobacteria	Actinobacteria	Actinomycetales	Corynebacteriaceae	Corynebacterium
neg.ctrl_PCR_3_7287465	k__Bacteria;p__Actinobacteria;c__Actinobacteria;o__Actinomycetales;f__Corynebacteriaceae;g__Corynebacterium;	Bacteria	Actinobacteria	Actinobacteria	Actinomycetales	Corynebacteriaceae	Corynebacterium
neg.ctrl_PCR_3_7354870	k__Bacteria;p__Actinobacteria;c__Actinobacteria;o__Actinomycetales;f__Corynebacteriaceae;g__Corynebacterium;	Bacteria	Actinobacteria	Actinobacteria	Actinomycetales	Corynebacteriaceae	Corynebacterium
neg.ctrl1_4282779	k__Bacteria;p__Actinobacteria;c__Actinobacteria;o__Actinomycetales;f__Corynebacteriaceae;g__Corynebacterium;s__stationis;	Bacteria	Actinobacteria	Actinobacteria	Actinomycetales	Corynebacteriaceae	Corynebacterium	stationis
neg.ctrl4_2525661	k__Bacteria;p__Actinobacteria;c__Actinobacteria;o__Actinomycetales;f__Corynebacteriaceae;g__Corynebacterium;s__stationis;	Bacteria	Actinobacteria	Actinobacteria	Actinomycetales	Corynebacteriaceae	Corynebacterium	stationis
neg.ctrl7_2408224	k__Bacteria;p__Actinobacteria;c__Actinobacteria;o__Actinomycetales;f__Corynebacteriaceae;g__Corynebacterium;	Bacteria	Actinobacteria	Actinobacteria	Actinomycetales	Corynebacteriaceae	Corynebacterium
neg.ctrl7_2568421	k__Bacteria;p__Actinobacteria;c__Actinobacteria;o__Actinomycetales;f__Corynebacteriaceae;g__Corynebacterium;	Bacteria	Actinobacteria	Actinobacteria	Actinomycetales	Corynebacteriaceae	Corynebacterium
neg.ctrl7_2853473	k__Bacteria;p__Actinobacteria;c__Actinobacteria;o__Actinomycetales;f__Corynebacteriaceae;g__Corynebacterium;	Bacteria	Actinobacteria	Actinobacteria	Actinomycetales	Corynebacteriaceae	Corynebacterium
neg.ctrl7_3069363	k__Bacteria;p__Actinobacteria;c__Actinobacteria;o__Actinomycetales;f__Corynebacteriaceae;g__Corynebacterium;	Bacteria	Actinobacteria	Actinobacteria	Actinomycetales	Corynebacteriaceae	Corynebacterium
neg.ctrl7_3170207	k__Bacteria;p__Actinobacteria;c__Actinobacteria;o__Actinomycetales;f__Corynebacteriaceae;g__Corynebacterium;	Bacteria	Actinobacteria	Actinobacteria	Actinomycetales	Corynebacteriaceae	Corynebacterium
neg.ctrl7_3181512	k__Bacteria;p__Actinobacteria;c__Actinobacteria;o__Actinomycetales;f__Corynebacteriaceae;g__Corynebacterium;	Bacteria	Actinobacteria	Actinobacteria	Actinomycetales	Corynebacteriaceae	Corynebacterium
neg.ctrl7_3820015	k__Bacteria;p__Actinobacteria;c__Actinobacteria;o__Actinomycetales;f__Corynebacteriaceae;g__Corynebacterium;	Bacteria	Actinobacteria	Actinobacteria	Actinomycetales	Corynebacteriaceae	Corynebacterium
neg.ctrl7_4063771	k__Bacteria;p__Actinobacteria;c__Actinobacteria;o__Actinomycetales;f__Corynebacteriaceae;g__Corynebacterium;	Bacteria	Actinobacteria	Actinobacteria	Actinomycetales	Corynebacteriaceae	Corynebacterium
empty3_2165084	k__Bacteria;p__Actinobacteria;c__Actinobacteria;o__Actinomycetales;f__Dermabacteraceae;	Bacteria	Actinobacteria	Actinobacteria	Actinomycetales	Dermabacteraceae
neg.ctrl_PCR_4_10076046	k__Bacteria;p__Actinobacteria;c__Actinobacteria;o__Actinomycetales;f__Dermabacteraceae;	Bacteria	Actinobacteria	Actinobacteria	Actinomycetales	Dermabacteraceae
neg.ctrl_PCR_4_10097823	k__Bacteria;p__Actinobacteria;c__Actinobacteria;o__Actinomycetales;f__Dermabacteraceae;	Bacteria	Actinobacteria	Actinobacteria	Actinomycetales	Dermabacteraceae
neg.ctrl_PCR_4_11652197	k__Bacteria;p__Actinobacteria;c__Actinobacteria;o__Actinomycetales;f__Dermabacteraceae;	Bacteria	Actinobacteria	Actinobacteria	Actinomycetales	Dermabacteraceae
neg.ctrl_PCR_4_11979654	k__Bacteria;p__Actinobacteria;c__Actinobacteria;o__Actinomycetales;f__Dermabacteraceae;	Bacteria	Actinobacteria	Actinobacteria	Actinomycetales	Dermabacteraceae
neg.ctrl_PCR_4_7701224	k__Bacteria;p__Actinobacteria;c__Actinobacteria;o__Actinomycetales;f__Dermabacteraceae;	Bacteria	Actinobacteria	Actinobacteria	Actinomycetales	Dermabacteraceae
neg.ctrl_PCR_4_7825498	k__Bacteria;p__Actinobacteria;c__Actinobacteria;o__Actinomycetales;f__Dermabacteraceae;	Bacteria	Actinobacteria	Actinobacteria	Actinomycetales	Dermabacteraceae
neg.ctrl_PCR_5_10630471	k__Bacteria;p__Actinobacteria;c__Actinobacteria;o__Actinomycetales;f__Dermabacteraceae;	Bacteria	Actinobacteria	Actinobacteria	Actinomycetales	Dermabacteraceae
neg.ctrl_PCR_5_10978885	k__Bacteria;p__Actinobacteria;c__Actinobacteria;o__Actinomycetales;f__Dermabacteraceae;	Bacteria	Actinobacteria	Actinobacteria	Actinomycetales	Dermabacteraceae
neg.ctrl_PCR_5_11427196	k__Bacteria;p__Actinobacteria;c__Actinobacteria;o__Actinomycetales;f__Dermabacteraceae;	Bacteria	Actinobacteria	Actinobacteria	Actinomycetales	Dermabacteraceae
neg.ctrl_PCR_5_11454458	k__Bacteria;p__Actinobacteria;c__Actinobacteria;o__Actinomycetales;f__Dermabacteraceae;	Bacteria	Actinobacteria	Actinobacteria	Actinomycetales	Dermabacteraceae
neg.ctrl_PCR_5_11728029	k__Bacteria;p__Actinobacteria;c__Actinobacteria;o__Actinomycetales;f__Dermabacteraceae;	Bacteria	Actinobacteria	Actinobacteria	Actinomycetales	Dermabacteraceae
neg.ctrl_PCR_5_11744445	k__Bacteria;p__Actinobacteria;c__Actinobacteria;o__Actinomycetales;f__Dermabacteraceae;	Bacteria	Actinobacteria	Actinobacteria	Actinomycetales	Dermabacteraceae
neg.ctrl_PCR_5_12158295	k__Bacteria;p__Actinobacteria;c__Actinobacteria;o__Actinomycetales;f__Dermabacteraceae;	Bacteria	Actinobacteria	Actinobacteria	Actinomycetales	Dermabacteraceae
neg.ctrl_PCR_5_12431022	k__Bacteria;p__Actinobacteria;c__Actinobacteria;o__Actinomycetales;f__Dermabacteraceae;	Bacteria	Actinobacteria	Actinobacteria	Actinomycetales	Dermabacteraceae
neg.ctrl_PCR_5_12925182	k__Bacteria;p__Actinobacteria;c__Actinobacteria;o__Actinomycetales;f__Dermabacteraceae;	Bacteria	Actinobacteria	Actinobacteria	Actinomycetales	Dermabacteraceae
neg.ctrl_PCR_5_13185809	k__Bacteria;p__Actinobacteria;c__Actinobacteria;o__Actinomycetales;f__Dermabacteraceae;	Bacteria	Actinobacteria	Actinobacteria	Actinomycetales	Dermabacteraceae
neg.ctrl_PCR_5_13462663	k__Bacteria;p__Actinobacteria;c__Actinobacteria;o__Actinomycetales;f__Dermabacteraceae;	Bacteria	Actinobacteria	Actinobacteria	Actinomycetales	Dermabacteraceae
neg.ctrl_PCR_5_13609241	k__Bacteria;p__Actinobacteria;c__Actinobacteria;o__Actinomycetales;f__Dermabacteraceae;	Bacteria	Actinobacteria	Actinobacteria	Actinomycetales	Dermabacteraceae
neg.ctrl1_2599621	k__Bacteria;p__Actinobacteria;c__Actinobacteria;o__Actinomycetales;f__Dermabacteraceae;	Bacteria	Actinobacteria	Actinobacteria	Actinomycetales	Dermabacteraceae
neg.ctrl1_3024508	k__Bacteria;p__Actinobacteria;c__Actinobacteria;o__Actinomycetales;f__Dermabacteraceae;	Bacteria	Actinobacteria	Actinobacteria	Actinomycetales	Dermabacteraceae
neg.ctrl1_3556348	k__Bacteria;p__Actinobacteria;c__Actinobacteria;o__Actinomycetales;f__Dermabacteraceae;	Bacteria	Actinobacteria	Actinobacteria	Actinomycetales	Dermabacteraceae
neg.ctrl5_4470193	k__Bacteria;p__Actinobacteria;c__Actinobacteria;o__Actinomycetales;f__Dermabacteraceae;	Bacteria	Actinobacteria	Actinobacteria	Actinomycetales	Dermabacteraceae
neg.ctrl5_5292464	k__Bacteria;p__Actinobacteria;c__Actinobacteria;o__Actinomycetales;f__Dermabacteraceae;	Bacteria	Actinobacteria	Actinobacteria	Actinomycetales	Dermabacteraceae
neg.ctrl5_6294335	k__Bacteria;p__Actinobacteria;c__Actinobacteria;o__Actinomycetales;f__Dermabacteraceae;	Bacteria	Actinobacteria	Actinobacteria	Actinomycetales	Dermabacteraceae
empty1_1895609	k__Bacteria;p__Actinobacteria;c__Actinobacteria;o__Actinomycetales;f__Geodermatophilaceae;g__Blastococcus;s__aggregatus;	Bacteria	Actinobacteria	Actinobacteria	Actinomycetales	Geodermatophilaceae	Blastococcus	aggregatus
neg.ctrl3_3011769	k__Bacteria;p__Actinobacteria;c__Actinobacteria;o__Actinomycetales;f__Intrasporangiaceae;	Bacteria	Actinobacteria	Actinobacteria	Actinomycetales	Intrasporangiaceae
empty3_2448696	k__Bacteria;p__Actinobacteria;c__Actinobacteria;o__Actinomycetales;f__Microbacteriaceae;g__Clavibacter;s__michiganensis;	Bacteria	Actinobacteria	Actinobacteria	Actinomycetales	Microbacteriaceae	Clavibacter	michiganensis
empty3_2102209	k__Bacteria;p__Actinobacteria;c__Actinobacteria;o__Actinomycetales;f__Microbacteriaceae;g__Frigoribacterium;	Bacteria	Actinobacteria	Actinobacteria	Actinomycetales	Microbacteriaceae	Frigoribacterium
empty3_2336476	k__Bacteria;p__Actinobacteria;c__Actinobacteria;o__Actinomycetales;f__Microbacteriaceae;g__Frigoribacterium;	Bacteria	Actinobacteria	Actinobacteria	Actinomycetales	Microbacteriaceae	Frigoribacterium
empty3_2344696	k__Bacteria;p__Actinobacteria;c__Actinobacteria;o__Actinomycetales;f__Microbacteriaceae;g__Frigoribacterium;	Bacteria	Actinobacteria	Actinobacteria	Actinomycetales	Microbacteriaceae	Frigoribacterium
neg.ctrl_PCR_3_4787028	k__Bacteria;p__Actinobacteria;c__Actinobacteria;o__Actinomycetales;f__Microbacteriaceae;g__Microbacterium;	Bacteria	Actinobacteria	Actinobacteria	Actinomycetales	Microbacteriaceae	Microbacterium
neg.ctrl_PCR_4_12821036	k__Bacteria;p__Actinobacteria;c__Actinobacteria;o__Actinomycetales;f__Microbacteriaceae;g__Microbacterium;s__chocolatum;	Bacteria	Actinobacteria	Actinobacteria	Actinomycetales	Microbacteriaceae	Microbacterium	chocolatum
empty3_1316266	k__Bacteria;p__Actinobacteria;c__Actinobacteria;o__Actinomycetales;f__Microbacteriaceae;g__Pseudoclavibacter;s__bifida;	Bacteria	Actinobacteria	Actinobacteria	Actinomycetales	Microbacteriaceae	Pseudoclavibacter	bifida
empty3_1539550	k__Bacteria;p__Actinobacteria;c__Actinobacteria;o__Actinomycetales;f__Microbacteriaceae;g__Pseudoclavibacter;s__bifida;	Bacteria	Actinobacteria	Actinobacteria	Actinomycetales	Microbacteriaceae	Pseudoclavibacter	bifida
neg.ctrl_PCR_2_3017557	k__Bacteria;p__Actinobacteria;c__Actinobacteria;o__Actinomycetales;f__Microbacteriaceae;g__Pseudoclavibacter;s__bifida;	Bacteria	Actinobacteria	Actinobacteria	Actinomycetales	Microbacteriaceae	Pseudoclavibacter	bifida
neg.ctrl_PCR_2_4327207	k__Bacteria;p__Actinobacteria;c__Actinobacteria;o__Actinomycetales;f__Microbacteriaceae;g__Pseudoclavibacter;s__bifida;	Bacteria	Actinobacteria	Actinobacteria	Actinomycetales	Microbacteriaceae	Pseudoclavibacter	bifida
neg.ctrl_PCR_2_4435128	k__Bacteria;p__Actinobacteria;c__Actinobacteria;o__Actinomycetales;f__Microbacteriaceae;g__Pseudoclavibacter;s__bifida;	Bacteria	Actinobacteria	Actinobacteria	Actinomycetales	Microbacteriaceae	Pseudoclavibacter	bifida
neg.ctrl_PCR_5_13420039	k__Bacteria;p__Actinobacteria;c__Actinobacteria;o__Actinomycetales;f__Microbacteriaceae;g__Pseudoclavibacter;s__bifida;	Bacteria	Actinobacteria	Actinobacteria	Actinomycetales	Microbacteriaceae	Pseudoclavibacter	bifida
neg.ctrl_PCR_5_14221967	k__Bacteria;p__Actinobacteria;c__Actinobacteria;o__Actinomycetales;f__Microbacteriaceae;g__Pseudoclavibacter;s__bifida;	Bacteria	Actinobacteria	Actinobacteria	Actinomycetales	Microbacteriaceae	Pseudoclavibacter	bifida
empty2_3489334	k__Bacteria;p__Actinobacteria;c__Actinobacteria;o__Actinomycetales;f__Microbacteriaceae;	Bacteria	Actinobacteria	Actinobacteria	Actinomycetales	Microbacteriaceae
empty2_4481813	k__Bacteria;p__Actinobacteria;c__Actinobacteria;o__Actinomycetales;f__Microbacteriaceae;	Bacteria	Actinobacteria	Actinobacteria	Actinomycetales	Microbacteriaceae
neg.ctrl3_3234435	k__Bacteria;p__Actinobacteria;c__Actinobacteria;o__Actinomycetales;f__Micrococcaceae;g__Micrococcus;	Bacteria	Actinobacteria	Actinobacteria	Actinomycetales	Micrococcaceae	Micrococcus
neg.ctrl3_3377951	k__Bacteria;p__Actinobacteria;c__Actinobacteria;o__Actinomycetales;f__Micrococcaceae;g__Micrococcus;	Bacteria	Actinobacteria	Actinobacteria	Actinomycetales	Micrococcaceae	Micrococcus
neg.ctrl4_1393194	k__Bacteria;p__Actinobacteria;c__Actinobacteria;o__Actinomycetales;f__Mycobacteriaceae;g__Mycobacterium;	Bacteria	Actinobacteria	Actinobacteria	Actinomycetales	Mycobacteriaceae	Mycobacterium
neg.ctrl4_1514546	k__Bacteria;p__Actinobacteria;c__Actinobacteria;o__Actinomycetales;f__Mycobacteriaceae;g__Mycobacterium;	Bacteria	Actinobacteria	Actinobacteria	Actinomycetales	Mycobacteriaceae	Mycobacterium
neg.ctrl4_2381368	k__Bacteria;p__Actinobacteria;c__Actinobacteria;o__Actinomycetales;f__Mycobacteriaceae;g__Mycobacterium;	Bacteria	Actinobacteria	Actinobacteria	Actinomycetales	Mycobacteriaceae	Mycobacterium
neg.ctrl4_2405993	k__Bacteria;p__Actinobacteria;c__Actinobacteria;o__Actinomycetales;f__Mycobacteriaceae;g__Mycobacterium;	Bacteria	Actinobacteria	Actinobacteria	Actinomycetales	Mycobacteriaceae	Mycobacterium
neg.ctrl7_2377901	k__Bacteria;p__Actinobacteria;c__Actinobacteria;o__Actinomycetales;f__Mycobacteriaceae;g__Mycobacterium;	Bacteria	Actinobacteria	Actinobacteria	Actinomycetales	Mycobacteriaceae	Mycobacterium
neg.ctrl7_2566854	k__Bacteria;p__Actinobacteria;c__Actinobacteria;o__Actinomycetales;f__Mycobacteriaceae;g__Mycobacterium;	Bacteria	Actinobacteria	Actinobacteria	Actinomycetales	Mycobacteriaceae	Mycobacterium
neg.ctrl7_3789179	k__Bacteria;p__Actinobacteria;c__Actinobacteria;o__Actinomycetales;f__Mycobacteriaceae;g__Mycobacterium;	Bacteria	Actinobacteria	Actinobacteria	Actinomycetales	Mycobacteriaceae	Mycobacterium
neg.ctrl7_4075155	k__Bacteria;p__Actinobacteria;c__Actinobacteria;o__Actinomycetales;f__Mycobacteriaceae;g__Mycobacterium;	Bacteria	Actinobacteria	Actinobacteria	Actinomycetales	Mycobacteriaceae	Mycobacterium
empty1_1240304	k__Bacteria;p__Actinobacteria;c__Actinobacteria;o__Actinomycetales;f__Nocardiaceae;g__Rhodococcus;	Bacteria	Actinobacteria	Actinobacteria	Actinomycetales	Nocardiaceae	Rhodococcus
empty1_1494330	k__Bacteria;p__Actinobacteria;c__Actinobacteria;o__Actinomycetales;f__Nocardiaceae;g__Rhodococcus;	Bacteria	Actinobacteria	Actinobacteria	Actinomycetales	Nocardiaceae	Rhodococcus
empty2_4030396	k__Bacteria;p__Actinobacteria;c__Actinobacteria;o__Actinomycetales;f__Nocardiaceae;g__Rhodococcus;	Bacteria	Actinobacteria	Actinobacteria	Actinomycetales	Nocardiaceae	Rhodococcus
neg.ctrl_PCR_4_10969743	k__Bacteria;p__Actinobacteria;c__Actinobacteria;o__Actinomycetales;f__Nocardiaceae;g__Rhodococcus;	Bacteria	Actinobacteria	Actinobacteria	Actinomycetales	Nocardiaceae	Rhodococcus
neg.ctrl_PCR_4_11089918	k__Bacteria;p__Actinobacteria;c__Actinobacteria;o__Actinomycetales;f__Nocardiaceae;g__Rhodococcus;	Bacteria	Actinobacteria	Actinobacteria	Actinomycetales	Nocardiaceae	Rhodococcus
neg.ctrl_PCR_4_11161124	k__Bacteria;p__Actinobacteria;c__Actinobacteria;o__Actinomycetales;f__Nocardiaceae;g__Rhodococcus;	Bacteria	Actinobacteria	Actinobacteria	Actinomycetales	Nocardiaceae	Rhodococcus
neg.ctrl_PCR_4_11254180	k__Bacteria;p__Actinobacteria;c__Actinobacteria;o__Actinomycetales;f__Nocardiaceae;g__Rhodococcus;	Bacteria	Actinobacteria	Actinobacteria	Actinomycetales	Nocardiaceae	Rhodococcus
neg.ctrl_PCR_4_11308193	k__Bacteria;p__Actinobacteria;c__Actinobacteria;o__Actinomycetales;f__Nocardiaceae;g__Rhodococcus;	Bacteria	Actinobacteria	Actinobacteria	Actinomycetales	Nocardiaceae	Rhodococcus
neg.ctrl_PCR_4_11512778	k__Bacteria;p__Actinobacteria;c__Actinobacteria;o__Actinomycetales;f__Nocardiaceae;g__Rhodococcus;	Bacteria	Actinobacteria	Actinobacteria	Actinomycetales	Nocardiaceae	Rhodococcus
neg.ctrl_PCR_4_11907008	k__Bacteria;p__Actinobacteria;c__Actinobacteria;o__Actinomycetales;f__Nocardiaceae;g__Rhodococcus;	Bacteria	Actinobacteria	Actinobacteria	Actinomycetales	Nocardiaceae	Rhodococcus
neg.ctrl_PCR_4_12113819	k__Bacteria;p__Actinobacteria;c__Actinobacteria;o__Actinomycetales;f__Nocardiaceae;g__Rhodococcus;	Bacteria	Actinobacteria	Actinobacteria	Actinomycetales	Nocardiaceae	Rhodococcus
neg.ctrl_PCR_4_12261745	k__Bacteria;p__Actinobacteria;c__Actinobacteria;o__Actinomycetales;f__Nocardiaceae;g__Rhodococcus;	Bacteria	Actinobacteria	Actinobacteria	Actinomycetales	Nocardiaceae	Rhodococcus
neg.ctrl_PCR_4_12459269	k__Bacteria;p__Actinobacteria;c__Actinobacteria;o__Actinomycetales;f__Nocardiaceae;g__Rhodococcus;	Bacteria	Actinobacteria	Actinobacteria	Actinomycetales	Nocardiaceae	Rhodococcus
neg.ctrl_PCR_4_7742591	k__Bacteria;p__Actinobacteria;c__Actinobacteria;o__Actinomycetales;f__Nocardiaceae;g__Rhodococcus;	Bacteria	Actinobacteria	Actinobacteria	Actinomycetales	Nocardiaceae	Rhodococcus
neg.ctrl_PCR_4_7846641	k__Bacteria;p__Actinobacteria;c__Actinobacteria;o__Actinomycetales;f__Nocardiaceae;g__Rhodococcus;	Bacteria	Actinobacteria	Actinobacteria	Actinomycetales	Nocardiaceae	Rhodococcus
neg.ctrl_PCR_4_7853475	k__Bacteria;p__Actinobacteria;c__Actinobacteria;o__Actinomycetales;f__Nocardiaceae;g__Rhodococcus;	Bacteria	Actinobacteria	Actinobacteria	Actinomycetales	Nocardiaceae	Rhodococcus
neg.ctrl_PCR_4_8023677	k__Bacteria;p__Actinobacteria;c__Actinobacteria;o__Actinomycetales;f__Nocardiaceae;g__Rhodococcus;	Bacteria	Actinobacteria	Actinobacteria	Actinomycetales	Nocardiaceae	Rhodococcus
neg.ctrl_PCR_4_8154421	k__Bacteria;p__Actinobacteria;c__Actinobacteria;o__Actinomycetales;f__Nocardiaceae;g__Rhodococcus;	Bacteria	Actinobacteria	Actinobacteria	Actinomycetales	Nocardiaceae	Rhodococcus
neg.ctrl_PCR_4_8417251	k__Bacteria;p__Actinobacteria;c__Actinobacteria;o__Actinomycetales;f__Nocardiaceae;g__Rhodococcus;	Bacteria	Actinobacteria	Actinobacteria	Actinomycetales	Nocardiaceae	Rhodococcus
neg.ctrl_PCR_4_8786138	k__Bacteria;p__Actinobacteria;c__Actinobacteria;o__Actinomycetales;f__Nocardiaceae;g__Rhodococcus;	Bacteria	Actinobacteria	Actinobacteria	Actinomycetales	Nocardiaceae	Rhodococcus
neg.ctrl_PCR_4_8826645	k__Bacteria;p__Actinobacteria;c__Actinobacteria;o__Actinomycetales;f__Nocardiaceae;g__Rhodococcus;	Bacteria	Actinobacteria	Actinobacteria	Actinomycetales	Nocardiaceae	Rhodococcus
neg.ctrl_PCR_4_9083097	k__Bacteria;p__Actinobacteria;c__Actinobacteria;o__Actinomycetales;f__Nocardiaceae;g__Rhodococcus;	Bacteria	Actinobacteria	Actinobacteria	Actinomycetales	Nocardiaceae	Rhodococcus
neg.ctrl_PCR_4_9137681	k__Bacteria;p__Actinobacteria;c__Actinobacteria;o__Actinomycetales;f__Nocardiaceae;g__Rhodococcus;	Bacteria	Actinobacteria	Actinobacteria	Actinomycetales	Nocardiaceae	Rhodococcus
neg.ctrl_PCR_4_9413202	k__Bacteria;p__Actinobacteria;c__Actinobacteria;o__Actinomycetales;f__Nocardiaceae;g__Rhodococcus;	Bacteria	Actinobacteria	Actinobacteria	Actinomycetales	Nocardiaceae	Rhodococcus
neg.ctrl5_5331071	k__Bacteria;p__Actinobacteria;c__Actinobacteria;o__Actinomycetales;f__Nocardiaceae;g__Rhodococcus;	Bacteria	Actinobacteria	Actinobacteria	Actinomycetales	Nocardiaceae	Rhodococcus
neg.ctrl5_6217901	k__Bacteria;p__Actinobacteria;c__Actinobacteria;o__Actinomycetales;f__Nocardiaceae;g__Rhodococcus;	Bacteria	Actinobacteria	Actinobacteria	Actinomycetales	Nocardiaceae	Rhodococcus
empty3_1707737	k__Bacteria;p__Actinobacteria;c__Actinobacteria;o__Actinomycetales;f__Nocardioidaceae;	Bacteria	Actinobacteria	Actinobacteria	Actinomycetales	Nocardioidaceae
neg.ctrl_PCR_5_14191086	k__Bacteria;p__Actinobacteria;c__Actinobacteria;o__Actinomycetales;f__Propionibacteriaceae;g__Propionibacterium;s__acnes;	Bacteria	Actinobacteria	Actinobacteria	Actinomycetales	Propionibacteriaceae	Propionibacterium	acnes
neg.ctrl5_5105996	k__Bacteria;p__Actinobacteria;c__Actinobacteria;o__Actinomycetales;f__Propionibacteriaceae;g__Propionibacterium;s__acnes;	Bacteria	Actinobacteria	Actinobacteria	Actinomycetales	Propionibacteriaceae	Propionibacterium	acnes
neg.ctrl5_4437605	k__Bacteria;p__Actinobacteria;c__Actinobacteria;o__Bifidobacteriales;f__Bifidobacteriaceae;g__Bifidobacterium;s__animalis;	Bacteria	Actinobacteria	Actinobacteria	Bifidobacteriales	Bifidobacteriaceae	Bifidobacterium	animalis
neg.ctrl5_5582016	k__Bacteria;p__Actinobacteria;c__Actinobacteria;o__Bifidobacteriales;f__Bifidobacteriaceae;g__Bifidobacterium;s__animalis;	Bacteria	Actinobacteria	Actinobacteria	Bifidobacteriales	Bifidobacteriaceae	Bifidobacterium	animalis
empty3_1497695	k__Bacteria;p__Actinobacteria;c__Coriobacteriia;o__Coriobacteriales;f__Coriobacteriaceae;g__Atopobium;	Bacteria	Actinobacteria	Coriobacteriia	Coriobacteriales	Coriobacteriaceae	Atopobium
empty3_1505526	k__Bacteria;p__Actinobacteria;c__Coriobacteriia;o__Coriobacteriales;f__Coriobacteriaceae;g__Atopobium;	Bacteria	Actinobacteria	Coriobacteriia	Coriobacteriales	Coriobacteriaceae	Atopobium
empty3_1898167	k__Bacteria;p__Actinobacteria;c__Coriobacteriia;o__Coriobacteriales;f__Coriobacteriaceae;g__Atopobium;	Bacteria	Actinobacteria	Coriobacteriia	Coriobacteriales	Coriobacteriaceae	Atopobium
empty3_1959949	k__Bacteria;p__Actinobacteria;c__Coriobacteriia;o__Coriobacteriales;f__Coriobacteriaceae;g__Atopobium;	Bacteria	Actinobacteria	Coriobacteriia	Coriobacteriales	Coriobacteriaceae	Atopobium
empty3_2090445	k__Bacteria;p__Actinobacteria;c__Coriobacteriia;o__Coriobacteriales;f__Coriobacteriaceae;g__Atopobium;	Bacteria	Actinobacteria	Coriobacteriia	Coriobacteriales	Coriobacteriaceae	Atopobium
empty3_2390307	k__Bacteria;p__Actinobacteria;c__Coriobacteriia;o__Coriobacteriales;f__Coriobacteriaceae;g__Atopobium;	Bacteria	Actinobacteria	Coriobacteriia	Coriobacteriales	Coriobacteriaceae	Atopobium
neg.ctrl6_2380311	k__Bacteria;p__Actinobacteria;c__Thermoleophilia;o__Solirubrobacterales;	Bacteria	Actinobacteria	Thermoleophilia	Solirubrobacterales
neg.ctrl_PCR_3_6568905	k__Bacteria;p__Armatimonadetes;c__[Fimbriimonadia];o__[Fimbriimonadales];f__[Fimbriimonadaceae];	Bacteria	Armatimonadetes	[Fimbriimonadia]	[Fimbriimonadales]	[Fimbriimonadaceae]
neg.ctrl_PCR_4_10526452	k__Bacteria;p__Armatimonadetes;c__[Fimbriimonadia];o__[Fimbriimonadales];f__[Fimbriimonadaceae];	Bacteria	Armatimonadetes	[Fimbriimonadia]	[Fimbriimonadales]	[Fimbriimonadaceae]
neg.ctrl_PCR_4_10660542	k__Bacteria;p__Armatimonadetes;c__[Fimbriimonadia];o__[Fimbriimonadales];f__[Fimbriimonadaceae];	Bacteria	Armatimonadetes	[Fimbriimonadia]	[Fimbriimonadales]	[Fimbriimonadaceae]
neg.ctrl_PCR_4_10673120	k__Bacteria;p__Armatimonadetes;c__[Fimbriimonadia];o__[Fimbriimonadales];f__[Fimbriimonadaceae];	Bacteria	Armatimonadetes	[Fimbriimonadia]	[Fimbriimonadales]	[Fimbriimonadaceae]
neg.ctrl_PCR_4_10755821	k__Bacteria;p__Armatimonadetes;c__[Fimbriimonadia];o__[Fimbriimonadales];f__[Fimbriimonadaceae];	Bacteria	Armatimonadetes	[Fimbriimonadia]	[Fimbriimonadales]	[Fimbriimonadaceae]
neg.ctrl_PCR_4_11680733	k__Bacteria;p__Armatimonadetes;c__[Fimbriimonadia];o__[Fimbriimonadales];f__[Fimbriimonadaceae];	Bacteria	Armatimonadetes	[Fimbriimonadia]	[Fimbriimonadales]	[Fimbriimonadaceae]
neg.ctrl_PCR_4_11815638	k__Bacteria;p__Armatimonadetes;c__[Fimbriimonadia];o__[Fimbriimonadales];f__[Fimbriimonadaceae];	Bacteria	Armatimonadetes	[Fimbriimonadia]	[Fimbriimonadales]	[Fimbriimonadaceae]
neg.ctrl_PCR_4_12733606	k__Bacteria;p__Armatimonadetes;c__[Fimbriimonadia];o__[Fimbriimonadales];f__[Fimbriimonadaceae];	Bacteria	Armatimonadetes	[Fimbriimonadia]	[Fimbriimonadales]	[Fimbriimonadaceae]
neg.ctrl_PCR_4_12809620	k__Bacteria;p__Armatimonadetes;c__[Fimbriimonadia];o__[Fimbriimonadales];f__[Fimbriimonadaceae];	Bacteria	Armatimonadetes	[Fimbriimonadia]	[Fimbriimonadales]	[Fimbriimonadaceae]
neg.ctrl_PCR_4_12854411	k__Bacteria;p__Armatimonadetes;c__[Fimbriimonadia];o__[Fimbriimonadales];f__[Fimbriimonadaceae];	Bacteria	Armatimonadetes	[Fimbriimonadia]	[Fimbriimonadales]	[Fimbriimonadaceae]
neg.ctrl_PCR_4_12881716	k__Bacteria;p__Armatimonadetes;c__[Fimbriimonadia];o__[Fimbriimonadales];f__[Fimbriimonadaceae];	Bacteria	Armatimonadetes	[Fimbriimonadia]	[Fimbriimonadales]	[Fimbriimonadaceae]
neg.ctrl_PCR_4_7735067	k__Bacteria;p__Armatimonadetes;c__[Fimbriimonadia];o__[Fimbriimonadales];f__[Fimbriimonadaceae];	Bacteria	Armatimonadetes	[Fimbriimonadia]	[Fimbriimonadales]	[Fimbriimonadaceae]
neg.ctrl_PCR_4_8432328	k__Bacteria;p__Armatimonadetes;c__[Fimbriimonadia];o__[Fimbriimonadales];f__[Fimbriimonadaceae];	Bacteria	Armatimonadetes	[Fimbriimonadia]	[Fimbriimonadales]	[Fimbriimonadaceae]
neg.ctrl_PCR_5_10037450	k__Bacteria;p__Armatimonadetes;c__[Fimbriimonadia];o__[Fimbriimonadales];f__[Fimbriimonadaceae];	Bacteria	Armatimonadetes	[Fimbriimonadia]	[Fimbriimonadales]	[Fimbriimonadaceae]
neg.ctrl_PCR_5_10714894	k__Bacteria;p__Armatimonadetes;c__[Fimbriimonadia];o__[Fimbriimonadales];f__[Fimbriimonadaceae];	Bacteria	Armatimonadetes	[Fimbriimonadia]	[Fimbriimonadales]	[Fimbriimonadaceae]
neg.ctrl_PCR_5_11302916	k__Bacteria;p__Armatimonadetes;c__[Fimbriimonadia];o__[Fimbriimonadales];f__[Fimbriimonadaceae];	Bacteria	Armatimonadetes	[Fimbriimonadia]	[Fimbriimonadales]	[Fimbriimonadaceae]
neg.ctrl_PCR_5_11502222	k__Bacteria;p__Armatimonadetes;c__[Fimbriimonadia];o__[Fimbriimonadales];f__[Fimbriimonadaceae];	Bacteria	Armatimonadetes	[Fimbriimonadia]	[Fimbriimonadales]	[Fimbriimonadaceae]
neg.ctrl_PCR_5_11841423	k__Bacteria;p__Armatimonadetes;c__[Fimbriimonadia];o__[Fimbriimonadales];f__[Fimbriimonadaceae];	Bacteria	Armatimonadetes	[Fimbriimonadia]	[Fimbriimonadales]	[Fimbriimonadaceae]
neg.ctrl_PCR_5_11864495	k__Bacteria;p__Armatimonadetes;c__[Fimbriimonadia];o__[Fimbriimonadales];f__[Fimbriimonadaceae];	Bacteria	Armatimonadetes	[Fimbriimonadia]	[Fimbriimonadales]	[Fimbriimonadaceae]
neg.ctrl_PCR_5_12210975	k__Bacteria;p__Armatimonadetes;c__[Fimbriimonadia];o__[Fimbriimonadales];f__[Fimbriimonadaceae];	Bacteria	Armatimonadetes	[Fimbriimonadia]	[Fimbriimonadales]	[Fimbriimonadaceae]
neg.ctrl_PCR_5_12223235	k__Bacteria;p__Armatimonadetes;c__[Fimbriimonadia];o__[Fimbriimonadales];f__[Fimbriimonadaceae];	Bacteria	Armatimonadetes	[Fimbriimonadia]	[Fimbriimonadales]	[Fimbriimonadaceae]
neg.ctrl_PCR_5_12673322	k__Bacteria;p__Armatimonadetes;c__[Fimbriimonadia];o__[Fimbriimonadales];f__[Fimbriimonadaceae];	Bacteria	Armatimonadetes	[Fimbriimonadia]	[Fimbriimonadales]	[Fimbriimonadaceae]
neg.ctrl_PCR_5_13468235	k__Bacteria;p__Armatimonadetes;c__[Fimbriimonadia];o__[Fimbriimonadales];f__[Fimbriimonadaceae];	Bacteria	Armatimonadetes	[Fimbriimonadia]	[Fimbriimonadales]	[Fimbriimonadaceae]
neg.ctrl_PCR_5_13963754	k__Bacteria;p__Armatimonadetes;c__[Fimbriimonadia];o__[Fimbriimonadales];f__[Fimbriimonadaceae];	Bacteria	Armatimonadetes	[Fimbriimonadia]	[Fimbriimonadales]	[Fimbriimonadaceae]
neg.ctrl_PCR_5_14017531	k__Bacteria;p__Armatimonadetes;c__[Fimbriimonadia];o__[Fimbriimonadales];f__[Fimbriimonadaceae];	Bacteria	Armatimonadetes	[Fimbriimonadia]	[Fimbriimonadales]	[Fimbriimonadaceae]
neg.ctrl5_5373146	k__Bacteria;p__Armatimonadetes;c__[Fimbriimonadia];o__[Fimbriimonadales];f__[Fimbriimonadaceae];	Bacteria	Armatimonadetes	[Fimbriimonadia]	[Fimbriimonadales]	[Fimbriimonadaceae]
neg.ctrl5_5510059	k__Bacteria;p__Armatimonadetes;c__[Fimbriimonadia];o__[Fimbriimonadales];f__[Fimbriimonadaceae];	Bacteria	Armatimonadetes	[Fimbriimonadia]	[Fimbriimonadales]	[Fimbriimonadaceae]
neg.ctrl5_6327175	k__Bacteria;p__Armatimonadetes;c__[Fimbriimonadia];o__[Fimbriimonadales];f__[Fimbriimonadaceae];	Bacteria	Armatimonadetes	[Fimbriimonadia]	[Fimbriimonadales]	[Fimbriimonadaceae]
neg.ctrl5_6341467	k__Bacteria;p__Armatimonadetes;c__[Fimbriimonadia];o__[Fimbriimonadales];f__[Fimbriimonadaceae];	Bacteria	Armatimonadetes	[Fimbriimonadia]	[Fimbriimonadales]	[Fimbriimonadaceae]
neg.ctrl7_2209532	k__Bacteria;p__Armatimonadetes;c__[Fimbriimonadia];o__[Fimbriimonadales];f__[Fimbriimonadaceae];	Bacteria	Armatimonadetes	[Fimbriimonadia]	[Fimbriimonadales]	[Fimbriimonadaceae]
neg.ctrl7_2638616	k__Bacteria;p__Armatimonadetes;c__[Fimbriimonadia];o__[Fimbriimonadales];f__[Fimbriimonadaceae];	Bacteria	Armatimonadetes	[Fimbriimonadia]	[Fimbriimonadales]	[Fimbriimonadaceae]
neg.ctrl7_2644444	k__Bacteria;p__Armatimonadetes;c__[Fimbriimonadia];o__[Fimbriimonadales];f__[Fimbriimonadaceae];	Bacteria	Armatimonadetes	[Fimbriimonadia]	[Fimbriimonadales]	[Fimbriimonadaceae]
neg.ctrl7_2880251	k__Bacteria;p__Armatimonadetes;c__[Fimbriimonadia];o__[Fimbriimonadales];f__[Fimbriimonadaceae];	Bacteria	Armatimonadetes	[Fimbriimonadia]	[Fimbriimonadales]	[Fimbriimonadaceae]
neg.ctrl7_3178220	k__Bacteria;p__Armatimonadetes;c__[Fimbriimonadia];o__[Fimbriimonadales];f__[Fimbriimonadaceae];	Bacteria	Armatimonadetes	[Fimbriimonadia]	[Fimbriimonadales]	[Fimbriimonadaceae]
neg.ctrl7_3753033	k__Bacteria;p__Armatimonadetes;c__[Fimbriimonadia];o__[Fimbriimonadales];f__[Fimbriimonadaceae];	Bacteria	Armatimonadetes	[Fimbriimonadia]	[Fimbriimonadales]	[Fimbriimonadaceae]
empty1_2735237	k__Bacteria;p__Bacteroidetes;c__[Saprospirae];o__[Saprospirales];f__Chitinophagaceae;g__Sediminibacterium;	Bacteria	Bacteroidetes	[Saprospirae]	[Saprospirales]	Chitinophagaceae	Sediminibacterium
empty1_2797034	k__Bacteria;p__Bacteroidetes;c__[Saprospirae];o__[Saprospirales];f__Chitinophagaceae;g__Sediminibacterium;	Bacteria	Bacteroidetes	[Saprospirae]	[Saprospirales]	Chitinophagaceae	Sediminibacterium
neg.ctrl_PCR_2_3737481	k__Bacteria;p__Bacteroidetes;c__[Saprospirae];o__[Saprospirales];f__Chitinophagaceae;g__Sediminibacterium;	Bacteria	Bacteroidetes	[Saprospirae]	[Saprospirales]	Chitinophagaceae	Sediminibacterium
neg.ctrl_PCR_2_3927799	k__Bacteria;p__Bacteroidetes;c__[Saprospirae];o__[Saprospirales];f__Chitinophagaceae;g__Sediminibacterium;	Bacteria	Bacteroidetes	[Saprospirae]	[Saprospirales]	Chitinophagaceae	Sediminibacterium
neg.ctrl_PCR_2_4028161	k__Bacteria;p__Bacteroidetes;c__[Saprospirae];o__[Saprospirales];f__Chitinophagaceae;g__Sediminibacterium;	Bacteria	Bacteroidetes	[Saprospirae]	[Saprospirales]	Chitinophagaceae	Sediminibacterium
neg.ctrl_PCR_2_4436999	k__Bacteria;p__Bacteroidetes;c__[Saprospirae];o__[Saprospirales];f__Chitinophagaceae;g__Sediminibacterium;	Bacteria	Bacteroidetes	[Saprospirae]	[Saprospirales]	Chitinophagaceae	Sediminibacterium
neg.ctrl_PCR_3_5114493	k__Bacteria;p__Bacteroidetes;c__[Saprospirae];o__[Saprospirales];f__Chitinophagaceae;g__Sediminibacterium;	Bacteria	Bacteroidetes	[Saprospirae]	[Saprospirales]	Chitinophagaceae	Sediminibacterium
neg.ctrl_PCR_3_5369352	k__Bacteria;p__Bacteroidetes;c__[Saprospirae];o__[Saprospirales];f__Chitinophagaceae;g__Sediminibacterium;	Bacteria	Bacteroidetes	[Saprospirae]	[Saprospirales]	Chitinophagaceae	Sediminibacterium
neg.ctrl_PCR_3_6995924	k__Bacteria;p__Bacteroidetes;c__[Saprospirae];o__[Saprospirales];f__Chitinophagaceae;g__Sediminibacterium;	Bacteria	Bacteroidetes	[Saprospirae]	[Saprospirales]	Chitinophagaceae	Sediminibacterium
neg.ctrl_PCR_3_7198806	k__Bacteria;p__Bacteroidetes;c__[Saprospirae];o__[Saprospirales];f__Chitinophagaceae;g__Sediminibacterium;	Bacteria	Bacteroidetes	[Saprospirae]	[Saprospirales]	Chitinophagaceae	Sediminibacterium
neg.ctrl_PCR_4_11477511	k__Bacteria;p__Bacteroidetes;c__[Saprospirae];o__[Saprospirales];f__Chitinophagaceae;g__Sediminibacterium;	Bacteria	Bacteroidetes	[Saprospirae]	[Saprospirales]	Chitinophagaceae	Sediminibacterium
neg.ctrl_PCR_4_11787136	k__Bacteria;p__Bacteroidetes;c__[Saprospirae];o__[Saprospirales];f__Chitinophagaceae;g__Sediminibacterium;	Bacteria	Bacteroidetes	[Saprospirae]	[Saprospirales]	Chitinophagaceae	Sediminibacterium
neg.ctrl_PCR_4_12312404	k__Bacteria;p__Bacteroidetes;c__[Saprospirae];o__[Saprospirales];f__Chitinophagaceae;g__Sediminibacterium;	Bacteria	Bacteroidetes	[Saprospirae]	[Saprospirales]	Chitinophagaceae	Sediminibacterium
neg.ctrl_PCR_4_12683564	k__Bacteria;p__Bacteroidetes;c__[Saprospirae];o__[Saprospirales];f__Chitinophagaceae;g__Sediminibacterium;	Bacteria	Bacteroidetes	[Saprospirae]	[Saprospirales]	Chitinophagaceae	Sediminibacterium
neg.ctrl_PCR_4_12705977	k__Bacteria;p__Bacteroidetes;c__[Saprospirae];o__[Saprospirales];f__Chitinophagaceae;g__Sediminibacterium;	Bacteria	Bacteroidetes	[Saprospirae]	[Saprospirales]	Chitinophagaceae	Sediminibacterium
neg.ctrl_PCR_4_12774760	k__Bacteria;p__Bacteroidetes;c__[Saprospirae];o__[Saprospirales];f__Chitinophagaceae;g__Sediminibacterium;	Bacteria	Bacteroidetes	[Saprospirae]	[Saprospirales]	Chitinophagaceae	Sediminibacterium
neg.ctrl_PCR_4_8593797	k__Bacteria;p__Bacteroidetes;c__[Saprospirae];o__[Saprospirales];f__Chitinophagaceae;g__Sediminibacterium;	Bacteria	Bacteroidetes	[Saprospirae]	[Saprospirales]	Chitinophagaceae	Sediminibacterium
neg.ctrl_PCR_4_9238137	k__Bacteria;p__Bacteroidetes;c__[Saprospirae];o__[Saprospirales];f__Chitinophagaceae;g__Sediminibacterium;	Bacteria	Bacteroidetes	[Saprospirae]	[Saprospirales]	Chitinophagaceae	Sediminibacterium
neg.ctrl_PCR_5_11238388	k__Bacteria;p__Bacteroidetes;c__[Saprospirae];o__[Saprospirales];f__Chitinophagaceae;g__Sediminibacterium;	Bacteria	Bacteroidetes	[Saprospirae]	[Saprospirales]	Chitinophagaceae	Sediminibacterium
neg.ctrl_PCR_5_12106858	k__Bacteria;p__Bacteroidetes;c__[Saprospirae];o__[Saprospirales];f__Chitinophagaceae;g__Sediminibacterium;	Bacteria	Bacteroidetes	[Saprospirae]	[Saprospirales]	Chitinophagaceae	Sediminibacterium
neg.ctrl_PCR_5_12488466	k__Bacteria;p__Bacteroidetes;c__[Saprospirae];o__[Saprospirales];f__Chitinophagaceae;g__Sediminibacterium;	Bacteria	Bacteroidetes	[Saprospirae]	[Saprospirales]	Chitinophagaceae	Sediminibacterium
neg.ctrl_PCR_5_13183372	k__Bacteria;p__Bacteroidetes;c__[Saprospirae];o__[Saprospirales];f__Chitinophagaceae;g__Sediminibacterium;	Bacteria	Bacteroidetes	[Saprospirae]	[Saprospirales]	Chitinophagaceae	Sediminibacterium
neg.ctrl_PCR_5_13415774	k__Bacteria;p__Bacteroidetes;c__[Saprospirae];o__[Saprospirales];f__Chitinophagaceae;g__Sediminibacterium;	Bacteria	Bacteroidetes	[Saprospirae]	[Saprospirales]	Chitinophagaceae	Sediminibacterium
neg.ctrl_PCR_5_13776852	k__Bacteria;p__Bacteroidetes;c__[Saprospirae];o__[Saprospirales];f__Chitinophagaceae;g__Sediminibacterium;	Bacteria	Bacteroidetes	[Saprospirae]	[Saprospirales]	Chitinophagaceae	Sediminibacterium
neg.ctrl_PCR_5_14228611	k__Bacteria;p__Bacteroidetes;c__[Saprospirae];o__[Saprospirales];f__Chitinophagaceae;g__Sediminibacterium;	Bacteria	Bacteroidetes	[Saprospirae]	[Saprospirales]	Chitinophagaceae	Sediminibacterium
neg.ctrl7_3379593	k__Bacteria;p__Bacteroidetes;c__[Saprospirae];o__[Saprospirales];f__Chitinophagaceae;g__Sediminibacterium;	Bacteria	Bacteroidetes	[Saprospirae]	[Saprospirales]	Chitinophagaceae	Sediminibacterium
neg.ctrl7_3713888	k__Bacteria;p__Bacteroidetes;c__[Saprospirae];o__[Saprospirales];f__Chitinophagaceae;g__Sediminibacterium;	Bacteria	Bacteroidetes	[Saprospirae]	[Saprospirales]	Chitinophagaceae	Sediminibacterium
empty3_1231825	k__Bacteria;p__Bacteroidetes;c__Bacteroidia;o__Bacteroidales;f__Bacteroidaceae;g__Bacteroides;	Bacteria	Bacteroidetes	Bacteroidia	Bacteroidales	Bacteroidaceae	Bacteroides
empty3_1668096	k__Bacteria;p__Bacteroidetes;c__Bacteroidia;o__Bacteroidales;f__Bacteroidaceae;g__Bacteroides;	Bacteria	Bacteroidetes	Bacteroidia	Bacteroidales	Bacteroidaceae	Bacteroides
empty3_2347543	k__Bacteria;p__Bacteroidetes;c__Bacteroidia;o__Bacteroidales;f__Bacteroidaceae;g__Bacteroides;	Bacteria	Bacteroidetes	Bacteroidia	Bacteroidales	Bacteroidaceae	Bacteroides
neg.ctrl3_3203094	k__Bacteria;p__Bacteroidetes;c__Bacteroidia;o__Bacteroidales;f__Porphyromonadaceae;g__Parabacteroides;s__distasonis;	Bacteria	Bacteroidetes	Bacteroidia	Bacteroidales	Porphyromonadaceae	Parabacteroides	distasonis
neg.ctrl6_3213957	k__Bacteria;p__Bacteroidetes;c__Bacteroidia;o__Bacteroidales;f__Porphyromonadaceae;g__Parabacteroides;s__distasonis;	Bacteria	Bacteroidetes	Bacteroidia	Bacteroidales	Porphyromonadaceae	Parabacteroides	distasonis
empty3_1370552	k__Bacteria;p__Bacteroidetes;c__Bacteroidia;o__Bacteroidales;f__Porphyromonadaceae;g__Porphyromonas;	Bacteria	Bacteroidetes	Bacteroidia	Bacteroidales	Porphyromonadaceae	Porphyromonas
empty3_1665254	k__Bacteria;p__Bacteroidetes;c__Bacteroidia;o__Bacteroidales;f__Prevotellaceae;g__Prevotella;	Bacteria	Bacteroidetes	Bacteroidia	Bacteroidales	Prevotellaceae	Prevotella
empty3_1763306	k__Bacteria;p__Bacteroidetes;c__Bacteroidia;o__Bacteroidales;f__Prevotellaceae;g__Prevotella;	Bacteria	Bacteroidetes	Bacteroidia	Bacteroidales	Prevotellaceae	Prevotella
empty3_2031480	k__Bacteria;p__Bacteroidetes;c__Bacteroidia;o__Bacteroidales;f__Prevotellaceae;g__Prevotella;	Bacteria	Bacteroidetes	Bacteroidia	Bacteroidales	Prevotellaceae	Prevotella
neg.ctrl5_5271216	k__Bacteria;p__Bacteroidetes;c__Bacteroidia;o__Bacteroidales;f__Prevotellaceae;g__Prevotella;	Bacteria	Bacteroidetes	Bacteroidia	Bacteroidales	Prevotellaceae	Prevotella
neg.ctrl6_3572058	k__Bacteria;p__Bacteroidetes;c__Bacteroidia;o__Bacteroidales;f__Prevotellaceae;g__Prevotella;	Bacteria	Bacteroidetes	Bacteroidia	Bacteroidales	Prevotellaceae	Prevotella
empty3_1629332	k__Bacteria;p__Bacteroidetes;c__Bacteroidia;o__Bacteroidales;f__S24-7;	Bacteria	Bacteroidetes	Bacteroidia	Bacteroidales	S24-7
empty3_1386244	k__Bacteria;p__Bacteroidetes;c__Cytophagia;o__Cytophagales;f__Cytophagaceae;g__Dyadobacter;	Bacteria	Bacteroidetes	Cytophagia	Cytophagales	Cytophagaceae	Dyadobacter
neg.ctrl5_4409253	k__Bacteria;p__Bacteroidetes;c__Flavobacteriia;o__Flavobacteriales;f__[Weeksellaceae];g__Chryseobacterium;	Bacteria	Bacteroidetes	Flavobacteriia	Flavobacteriales	[Weeksellaceae]	Chryseobacterium
neg.ctrl5_4576761	k__Bacteria;p__Bacteroidetes;c__Flavobacteriia;o__Flavobacteriales;f__[Weeksellaceae];g__Chryseobacterium;	Bacteria	Bacteroidetes	Flavobacteriia	Flavobacteriales	[Weeksellaceae]	Chryseobacterium
neg.ctrl5_7424016	k__Bacteria;p__Bacteroidetes;c__Flavobacteriia;o__Flavobacteriales;f__[Weeksellaceae];g__Chryseobacterium;	Bacteria	Bacteroidetes	Flavobacteriia	Flavobacteriales	[Weeksellaceae]	Chryseobacterium
neg.ctrl5_7502259	k__Bacteria;p__Bacteroidetes;c__Flavobacteriia;o__Flavobacteriales;f__[Weeksellaceae];g__Chryseobacterium;	Bacteria	Bacteroidetes	Flavobacteriia	Flavobacteriales	[Weeksellaceae]	Chryseobacterium
neg.ctrl_PCR_5_12497353	k__Bacteria;p__Bacteroidetes;c__Flavobacteriia;o__Flavobacteriales;f__[Weeksellaceae];g__Wautersiella;	Bacteria	Bacteroidetes	Flavobacteriia	Flavobacteriales	[Weeksellaceae]	Wautersiella
neg.ctrl_PCR_5_12511152	k__Bacteria;p__Bacteroidetes;c__Flavobacteriia;o__Flavobacteriales;f__[Weeksellaceae];g__Wautersiella;	Bacteria	Bacteroidetes	Flavobacteriia	Flavobacteriales	[Weeksellaceae]	Wautersiella
empty1_1389008	k__Bacteria;p__Bacteroidetes;c__Flavobacteriia;o__Flavobacteriales;f__Flavobacteriaceae;g__Flavobacterium;	Bacteria	Bacteroidetes	Flavobacteriia	Flavobacteriales	Flavobacteriaceae	Flavobacterium
empty1_1655992	k__Bacteria;p__Bacteroidetes;c__Flavobacteriia;o__Flavobacteriales;f__Flavobacteriaceae;g__Flavobacterium;	Bacteria	Bacteroidetes	Flavobacteriia	Flavobacteriales	Flavobacteriaceae	Flavobacterium
empty3_1210573	k__Bacteria;p__Bacteroidetes;c__Flavobacteriia;o__Flavobacteriales;f__Flavobacteriaceae;g__Flavobacterium;	Bacteria	Bacteroidetes	Flavobacteriia	Flavobacteriales	Flavobacteriaceae	Flavobacterium
empty3_1226493	k__Bacteria;p__Bacteroidetes;c__Flavobacteriia;o__Flavobacteriales;f__Flavobacteriaceae;g__Flavobacterium;	Bacteria	Bacteroidetes	Flavobacteriia	Flavobacteriales	Flavobacteriaceae	Flavobacterium
empty3_1242379	k__Bacteria;p__Bacteroidetes;c__Flavobacteriia;o__Flavobacteriales;f__Flavobacteriaceae;g__Flavobacterium;s__succinicans;	Bacteria	Bacteroidetes	Flavobacteriia	Flavobacteriales	Flavobacteriaceae	Flavobacterium	succinicans
empty3_1261874	k__Bacteria;p__Bacteroidetes;c__Flavobacteriia;o__Flavobacteriales;f__Flavobacteriaceae;g__Flavobacterium;s__frigidarium;	Bacteria	Bacteroidetes	Flavobacteriia	Flavobacteriales	Flavobacteriaceae	Flavobacterium	frigidarium
empty3_1348902	k__Bacteria;p__Bacteroidetes;c__Flavobacteriia;o__Flavobacteriales;f__Flavobacteriaceae;g__Flavobacterium;	Bacteria	Bacteroidetes	Flavobacteriia	Flavobacteriales	Flavobacteriaceae	Flavobacterium
empty3_1363135	k__Bacteria;p__Bacteroidetes;c__Flavobacteriia;o__Flavobacteriales;f__Flavobacteriaceae;g__Flavobacterium;	Bacteria	Bacteroidetes	Flavobacteriia	Flavobacteriales	Flavobacteriaceae	Flavobacterium
empty3_1375091	k__Bacteria;p__Bacteroidetes;c__Flavobacteriia;o__Flavobacteriales;f__Flavobacteriaceae;g__Flavobacterium;	Bacteria	Bacteroidetes	Flavobacteriia	Flavobacteriales	Flavobacteriaceae	Flavobacterium
empty3_1448813	k__Bacteria;p__Bacteroidetes;c__Flavobacteriia;o__Flavobacteriales;f__Flavobacteriaceae;g__Flavobacterium;	Bacteria	Bacteroidetes	Flavobacteriia	Flavobacteriales	Flavobacteriaceae	Flavobacterium
empty3_1451210	k__Bacteria;p__Bacteroidetes;c__Flavobacteriia;o__Flavobacteriales;f__Flavobacteriaceae;g__Flavobacterium;	Bacteria	Bacteroidetes	Flavobacteriia	Flavobacteriales	Flavobacteriaceae	Flavobacterium
empty3_1568172	k__Bacteria;p__Bacteroidetes;c__Flavobacteriia;o__Flavobacteriales;f__Flavobacteriaceae;g__Flavobacterium;	Bacteria	Bacteroidetes	Flavobacteriia	Flavobacteriales	Flavobacteriaceae	Flavobacterium
empty3_1569734	k__Bacteria;p__Bacteroidetes;c__Flavobacteriia;o__Flavobacteriales;f__Flavobacteriaceae;g__Flavobacterium;	Bacteria	Bacteroidetes	Flavobacteriia	Flavobacteriales	Flavobacteriaceae	Flavobacterium
empty3_1572985	k__Bacteria;p__Bacteroidetes;c__Flavobacteriia;o__Flavobacteriales;f__Flavobacteriaceae;g__Flavobacterium;	Bacteria	Bacteroidetes	Flavobacteriia	Flavobacteriales	Flavobacteriaceae	Flavobacterium
empty3_1587433	k__Bacteria;p__Bacteroidetes;c__Flavobacteriia;o__Flavobacteriales;f__Flavobacteriaceae;g__Flavobacterium;	Bacteria	Bacteroidetes	Flavobacteriia	Flavobacteriales	Flavobacteriaceae	Flavobacterium
empty3_1729747	k__Bacteria;p__Bacteroidetes;c__Flavobacteriia;o__Flavobacteriales;f__Flavobacteriaceae;g__Flavobacterium;s__frigidarium;	Bacteria	Bacteroidetes	Flavobacteriia	Flavobacteriales	Flavobacteriaceae	Flavobacterium	frigidarium
empty3_1743379	k__Bacteria;p__Bacteroidetes;c__Flavobacteriia;o__Flavobacteriales;f__Flavobacteriaceae;g__Flavobacterium;s__succinicans;	Bacteria	Bacteroidetes	Flavobacteriia	Flavobacteriales	Flavobacteriaceae	Flavobacterium	succinicans
empty3_1743581	k__Bacteria;p__Bacteroidetes;c__Flavobacteriia;o__Flavobacteriales;f__Flavobacteriaceae;g__Flavobacterium;	Bacteria	Bacteroidetes	Flavobacteriia	Flavobacteriales	Flavobacteriaceae	Flavobacterium
empty3_1762071	k__Bacteria;p__Bacteroidetes;c__Flavobacteriia;o__Flavobacteriales;f__Flavobacteriaceae;g__Flavobacterium;	Bacteria	Bacteroidetes	Flavobacteriia	Flavobacteriales	Flavobacteriaceae	Flavobacterium
empty3_1764516	k__Bacteria;p__Bacteroidetes;c__Flavobacteriia;o__Flavobacteriales;f__Flavobacteriaceae;g__Flavobacterium;s__succinicans;	Bacteria	Bacteroidetes	Flavobacteriia	Flavobacteriales	Flavobacteriaceae	Flavobacterium	succinicans
empty3_1800370	k__Bacteria;p__Bacteroidetes;c__Flavobacteriia;o__Flavobacteriales;f__Flavobacteriaceae;g__Flavobacterium;	Bacteria	Bacteroidetes	Flavobacteriia	Flavobacteriales	Flavobacteriaceae	Flavobacterium
empty3_1804159	k__Bacteria;p__Bacteroidetes;c__Flavobacteriia;o__Flavobacteriales;f__Flavobacteriaceae;g__Flavobacterium;s__succinicans;	Bacteria	Bacteroidetes	Flavobacteriia	Flavobacteriales	Flavobacteriaceae	Flavobacterium	succinicans
empty3_1809867	k__Bacteria;p__Bacteroidetes;c__Flavobacteriia;o__Flavobacteriales;f__Flavobacteriaceae;g__Flavobacterium;s__succinicans;	Bacteria	Bacteroidetes	Flavobacteriia	Flavobacteriales	Flavobacteriaceae	Flavobacterium	succinicans
empty3_1876579	k__Bacteria;p__Bacteroidetes;c__Flavobacteriia;o__Flavobacteriales;f__Flavobacteriaceae;g__Flavobacterium;	Bacteria	Bacteroidetes	Flavobacteriia	Flavobacteriales	Flavobacteriaceae	Flavobacterium
empty3_1888278	k__Bacteria;p__Bacteroidetes;c__Flavobacteriia;o__Flavobacteriales;f__Flavobacteriaceae;g__Flavobacterium;s__succinicans;	Bacteria	Bacteroidetes	Flavobacteriia	Flavobacteriales	Flavobacteriaceae	Flavobacterium	succinicans
empty3_1889843	k__Bacteria;p__Bacteroidetes;c__Flavobacteriia;o__Flavobacteriales;f__Flavobacteriaceae;g__Flavobacterium;	Bacteria	Bacteroidetes	Flavobacteriia	Flavobacteriales	Flavobacteriaceae	Flavobacterium
empty3_1927204	k__Bacteria;p__Bacteroidetes;c__Flavobacteriia;o__Flavobacteriales;f__Flavobacteriaceae;g__Flavobacterium;s__succinicans;	Bacteria	Bacteroidetes	Flavobacteriia	Flavobacteriales	Flavobacteriaceae	Flavobacterium	succinicans
empty3_1985482	k__Bacteria;p__Bacteroidetes;c__Flavobacteriia;o__Flavobacteriales;f__Flavobacteriaceae;g__Flavobacterium;	Bacteria	Bacteroidetes	Flavobacteriia	Flavobacteriales	Flavobacteriaceae	Flavobacterium
empty3_2004418	k__Bacteria;p__Bacteroidetes;c__Flavobacteriia;o__Flavobacteriales;f__Flavobacteriaceae;g__Flavobacterium;s__succinicans;	Bacteria	Bacteroidetes	Flavobacteriia	Flavobacteriales	Flavobacteriaceae	Flavobacterium	succinicans
empty3_2006239	k__Bacteria;p__Bacteroidetes;c__Flavobacteriia;o__Flavobacteriales;f__Flavobacteriaceae;g__Flavobacterium;	Bacteria	Bacteroidetes	Flavobacteriia	Flavobacteriales	Flavobacteriaceae	Flavobacterium
empty3_2008548	k__Bacteria;p__Bacteroidetes;c__Flavobacteriia;o__Flavobacteriales;f__Flavobacteriaceae;g__Flavobacterium;	Bacteria	Bacteroidetes	Flavobacteriia	Flavobacteriales	Flavobacteriaceae	Flavobacterium
empty3_2057630	k__Bacteria;p__Bacteroidetes;c__Flavobacteriia;o__Flavobacteriales;f__Flavobacteriaceae;g__Flavobacterium;	Bacteria	Bacteroidetes	Flavobacteriia	Flavobacteriales	Flavobacteriaceae	Flavobacterium
empty3_2091848	k__Bacteria;p__Bacteroidetes;c__Flavobacteriia;o__Flavobacteriales;f__Flavobacteriaceae;g__Flavobacterium;s__succinicans;	Bacteria	Bacteroidetes	Flavobacteriia	Flavobacteriales	Flavobacteriaceae	Flavobacterium	succinicans
empty3_2232381	k__Bacteria;p__Bacteroidetes;c__Flavobacteriia;o__Flavobacteriales;f__Flavobacteriaceae;g__Flavobacterium;s__succinicans;	Bacteria	Bacteroidetes	Flavobacteriia	Flavobacteriales	Flavobacteriaceae	Flavobacterium	succinicans
empty3_2242754	k__Bacteria;p__Bacteroidetes;c__Flavobacteriia;o__Flavobacteriales;f__Flavobacteriaceae;g__Flavobacterium;	Bacteria	Bacteroidetes	Flavobacteriia	Flavobacteriales	Flavobacteriaceae	Flavobacterium
empty3_2285894	k__Bacteria;p__Bacteroidetes;c__Flavobacteriia;o__Flavobacteriales;f__Flavobacteriaceae;g__Flavobacterium;s__succinicans;	Bacteria	Bacteroidetes	Flavobacteriia	Flavobacteriales	Flavobacteriaceae	Flavobacterium	succinicans
empty3_2340916	k__Bacteria;p__Bacteroidetes;c__Flavobacteriia;o__Flavobacteriales;f__Flavobacteriaceae;g__Flavobacterium;	Bacteria	Bacteroidetes	Flavobacteriia	Flavobacteriales	Flavobacteriaceae	Flavobacterium
empty3_1270465	k__Bacteria;p__Bacteroidetes;c__Sphingobacteriia;o__Sphingobacteriales;f__Sphingobacteriaceae;g__Pedobacter;	Bacteria	Bacteroidetes	Sphingobacteriia	Sphingobacteriales	Sphingobacteriaceae	Pedobacter
empty3_1280200	k__Bacteria;p__Bacteroidetes;c__Sphingobacteriia;o__Sphingobacteriales;f__Sphingobacteriaceae;g__Pedobacter;	Bacteria	Bacteroidetes	Sphingobacteriia	Sphingobacteriales	Sphingobacteriaceae	Pedobacter
empty3_1463220	k__Bacteria;p__Bacteroidetes;c__Sphingobacteriia;o__Sphingobacteriales;f__Sphingobacteriaceae;g__Pedobacter;	Bacteria	Bacteroidetes	Sphingobacteriia	Sphingobacteriales	Sphingobacteriaceae	Pedobacter
empty3_2257844	k__Bacteria;p__Bacteroidetes;c__Sphingobacteriia;o__Sphingobacteriales;f__Sphingobacteriaceae;g__Pedobacter;	Bacteria	Bacteroidetes	Sphingobacteriia	Sphingobacteriales	Sphingobacteriaceae	Pedobacter
empty3_2431878	k__Bacteria;p__Bacteroidetes;c__Sphingobacteriia;o__Sphingobacteriales;f__Sphingobacteriaceae;g__Pedobacter;	Bacteria	Bacteroidetes	Sphingobacteriia	Sphingobacteriales	Sphingobacteriaceae	Pedobacter
empty3_1400802	k__Bacteria;p__Chloroflexi;c__Chloroflexi;o__[Roseiflexales];f__[Kouleothrixaceae];	Bacteria	Chloroflexi	Chloroflexi	[Roseiflexales]	[Kouleothrixaceae]
empty3_2009053	k__Bacteria;p__Chloroflexi;c__Chloroflexi;o__[Roseiflexales];f__[Kouleothrixaceae];	Bacteria	Chloroflexi	Chloroflexi	[Roseiflexales]	[Kouleothrixaceae]
empty3_2162427	k__Bacteria;p__Chloroflexi;c__Chloroflexi;o__[Roseiflexales];f__[Kouleothrixaceae];	Bacteria	Chloroflexi	Chloroflexi	[Roseiflexales]	[Kouleothrixaceae]
empty3_2244880	k__Bacteria;p__Chloroflexi;c__Chloroflexi;o__[Roseiflexales];f__[Kouleothrixaceae];	Bacteria	Chloroflexi	Chloroflexi	[Roseiflexales]	[Kouleothrixaceae]
empty3_2285725	k__Bacteria;p__Chloroflexi;c__Chloroflexi;o__[Roseiflexales];f__[Kouleothrixaceae];	Bacteria	Chloroflexi	Chloroflexi	[Roseiflexales]	[Kouleothrixaceae]
neg.ctrl_PCR_3_6609344	k__Bacteria;p__Cyanobacteria;c__Chloroplast;o__Streptophyta;	Bacteria	Cyanobacteria	Chloroplast	Streptophyta
neg.ctrl_PCR_4_10373081	k__Bacteria;p__Cyanobacteria;c__Chloroplast;o__Streptophyta;	Bacteria	Cyanobacteria	Chloroplast	Streptophyta
neg.ctrl_PCR_4_10493130	k__Bacteria;p__Cyanobacteria;c__Chloroplast;o__Streptophyta;	Bacteria	Cyanobacteria	Chloroplast	Streptophyta
neg.ctrl_PCR_4_10644508	k__Bacteria;p__Cyanobacteria;c__Chloroplast;o__Streptophyta;	Bacteria	Cyanobacteria	Chloroplast	Streptophyta
neg.ctrl_PCR_4_10670026	k__Bacteria;p__Cyanobacteria;c__Chloroplast;o__Streptophyta;	Bacteria	Cyanobacteria	Chloroplast	Streptophyta
neg.ctrl_PCR_4_11352319	k__Bacteria;p__Cyanobacteria;c__Chloroplast;o__Streptophyta;	Bacteria	Cyanobacteria	Chloroplast	Streptophyta
neg.ctrl_PCR_4_11547504	k__Bacteria;p__Cyanobacteria;c__Chloroplast;o__Streptophyta;	Bacteria	Cyanobacteria	Chloroplast	Streptophyta
neg.ctrl_PCR_4_11956631	k__Bacteria;p__Cyanobacteria;c__Chloroplast;o__Streptophyta;	Bacteria	Cyanobacteria	Chloroplast	Streptophyta
neg.ctrl_PCR_4_12397866	k__Bacteria;p__Cyanobacteria;c__Chloroplast;o__Streptophyta;	Bacteria	Cyanobacteria	Chloroplast	Streptophyta
neg.ctrl_PCR_4_12633910	k__Bacteria;p__Cyanobacteria;c__Chloroplast;o__Streptophyta;	Bacteria	Cyanobacteria	Chloroplast	Streptophyta
neg.ctrl_PCR_4_12861065	k__Bacteria;p__Cyanobacteria;c__Chloroplast;o__Streptophyta;	Bacteria	Cyanobacteria	Chloroplast	Streptophyta
neg.ctrl_PCR_4_8046071	k__Bacteria;p__Cyanobacteria;c__Chloroplast;o__Streptophyta;	Bacteria	Cyanobacteria	Chloroplast	Streptophyta
neg.ctrl_PCR_4_8112687	k__Bacteria;p__Cyanobacteria;c__Chloroplast;o__Streptophyta;	Bacteria	Cyanobacteria	Chloroplast	Streptophyta
neg.ctrl_PCR_4_8323331	k__Bacteria;p__Cyanobacteria;c__Chloroplast;o__Streptophyta;	Bacteria	Cyanobacteria	Chloroplast	Streptophyta
neg.ctrl_PCR_4_8572036	k__Bacteria;p__Cyanobacteria;c__Chloroplast;o__Streptophyta;	Bacteria	Cyanobacteria	Chloroplast	Streptophyta
neg.ctrl_PCR_4_8618646	k__Bacteria;p__Cyanobacteria;c__Chloroplast;o__Streptophyta;	Bacteria	Cyanobacteria	Chloroplast	Streptophyta
neg.ctrl_PCR_4_8715108	k__Bacteria;p__Cyanobacteria;c__Chloroplast;o__Streptophyta;	Bacteria	Cyanobacteria	Chloroplast	Streptophyta
neg.ctrl_PCR_4_8802232	k__Bacteria;p__Cyanobacteria;c__Chloroplast;o__Streptophyta;	Bacteria	Cyanobacteria	Chloroplast	Streptophyta
neg.ctrl_PCR_4_9068129	k__Bacteria;p__Cyanobacteria;c__Chloroplast;o__Streptophyta;	Bacteria	Cyanobacteria	Chloroplast	Streptophyta
neg.ctrl_PCR_4_9128370	k__Bacteria;p__Cyanobacteria;c__Chloroplast;o__Streptophyta;	Bacteria	Cyanobacteria	Chloroplast	Streptophyta
neg.ctrl_PCR_4_9346742	k__Bacteria;p__Cyanobacteria;c__Chloroplast;o__Streptophyta;	Bacteria	Cyanobacteria	Chloroplast	Streptophyta
neg.ctrl3_2696540	k__Bacteria;p__Cyanobacteria;c__Chloroplast;o__Streptophyta;	Bacteria	Cyanobacteria	Chloroplast	Streptophyta
neg.ctrl7_4180868	k__Bacteria;p__Firmicutes;c__Bacilli;o__Bacillales;f__Bacillaceae;g__Bacillus;s__thermoamylovorans;	Bacteria	Firmicutes	Bacilli	Bacillales	Bacillaceae	Bacillus	thermoamylovorans
neg.ctrl_PCR_4_10266762	k__Bacteria;p__Firmicutes;c__Bacilli;o__Bacillales;f__Bacillaceae;	Bacteria	Firmicutes	Bacilli	Bacillales	Bacillaceae
empty3_2336138	k__Bacteria;p__Firmicutes;c__Bacilli;o__Bacillales;f__Paenibacillaceae;g__Paenibacillus;	Bacteria	Firmicutes	Bacilli	Bacillales	Paenibacillaceae	Paenibacillus
neg.ctrl3_3217668	k__Bacteria;p__Firmicutes;c__Bacilli;o__Bacillales;f__Planococcaceae;	Bacteria	Firmicutes	Bacilli	Bacillales	Planococcaceae
neg.ctrl5_4247980	k__Bacteria;p__Firmicutes;c__Bacilli;o__Bacillales;f__Staphylococcaceae;g__Staphylococcus;	Bacteria	Firmicutes	Bacilli	Bacillales	Staphylococcaceae	Staphylococcus
neg.ctrl5_4414821	k__Bacteria;p__Firmicutes;c__Bacilli;o__Bacillales;f__Staphylococcaceae;g__Staphylococcus;s__epidermidis;	Bacteria	Firmicutes	Bacilli	Bacillales	Staphylococcaceae	Staphylococcus	epidermidis
neg.ctrl5_4963613	k__Bacteria;p__Firmicutes;c__Bacilli;o__Bacillales;f__Staphylococcaceae;g__Staphylococcus;s__epidermidis;	Bacteria	Firmicutes	Bacilli	Bacillales	Staphylococcaceae	Staphylococcus	epidermidis
neg.ctrl5_5060937	k__Bacteria;p__Firmicutes;c__Bacilli;o__Bacillales;f__Staphylococcaceae;g__Staphylococcus;s__epidermidis;	Bacteria	Firmicutes	Bacilli	Bacillales	Staphylococcaceae	Staphylococcus	epidermidis
neg.ctrl5_5270938	k__Bacteria;p__Firmicutes;c__Bacilli;o__Bacillales;f__Staphylococcaceae;g__Staphylococcus;	Bacteria	Firmicutes	Bacilli	Bacillales	Staphylococcaceae	Staphylococcus
neg.ctrl5_6649108	k__Bacteria;p__Firmicutes;c__Bacilli;o__Bacillales;f__Staphylococcaceae;g__Staphylococcus;s__epidermidis;	Bacteria	Firmicutes	Bacilli	Bacillales	Staphylococcaceae	Staphylococcus	epidermidis
neg.ctrl7_2944222	k__Bacteria;p__Firmicutes;c__Bacilli;o__Bacillales;f__Staphylococcaceae;g__Staphylococcus;	Bacteria	Firmicutes	Bacilli	Bacillales	Staphylococcaceae	Staphylococcus
empty3_2443322	k__Bacteria;p__Firmicutes;c__Bacilli;o__Bacillales;f__Thermoactinomycetaceae;	Bacteria	Firmicutes	Bacilli	Bacillales	Thermoactinomycetaceae
neg.ctrl_PCR_5_10626267	k__Bacteria;p__Firmicutes;c__Bacilli;o__Lactobacillales;f__Aerococcaceae;g__Aerococcus;	Bacteria	Firmicutes	Bacilli	Lactobacillales	Aerococcaceae	Aerococcus
neg.ctrl_PCR_5_10982120	k__Bacteria;p__Firmicutes;c__Bacilli;o__Lactobacillales;f__Aerococcaceae;g__Aerococcus;	Bacteria	Firmicutes	Bacilli	Lactobacillales	Aerococcaceae	Aerococcus
neg.ctrl_PCR_5_11264450	k__Bacteria;p__Firmicutes;c__Bacilli;o__Lactobacillales;f__Aerococcaceae;g__Aerococcus;	Bacteria	Firmicutes	Bacilli	Lactobacillales	Aerococcaceae	Aerococcus
neg.ctrl_PCR_5_11532852	k__Bacteria;p__Firmicutes;c__Bacilli;o__Lactobacillales;f__Aerococcaceae;g__Aerococcus;	Bacteria	Firmicutes	Bacilli	Lactobacillales	Aerococcaceae	Aerococcus
neg.ctrl_PCR_5_12045561	k__Bacteria;p__Firmicutes;c__Bacilli;o__Lactobacillales;f__Aerococcaceae;g__Aerococcus;	Bacteria	Firmicutes	Bacilli	Lactobacillales	Aerococcaceae	Aerococcus
neg.ctrl_PCR_5_12158572	k__Bacteria;p__Firmicutes;c__Bacilli;o__Lactobacillales;f__Aerococcaceae;g__Aerococcus;	Bacteria	Firmicutes	Bacilli	Lactobacillales	Aerococcaceae	Aerococcus
neg.ctrl_PCR_5_12773558	k__Bacteria;p__Firmicutes;c__Bacilli;o__Lactobacillales;f__Aerococcaceae;g__Aerococcus;	Bacteria	Firmicutes	Bacilli	Lactobacillales	Aerococcaceae	Aerococcus
neg.ctrl_PCR_5_12971598	k__Bacteria;p__Firmicutes;c__Bacilli;o__Lactobacillales;f__Aerococcaceae;g__Aerococcus;	Bacteria	Firmicutes	Bacilli	Lactobacillales	Aerococcaceae	Aerococcus
neg.ctrl_PCR_5_13811437	k__Bacteria;p__Firmicutes;c__Bacilli;o__Lactobacillales;f__Aerococcaceae;g__Aerococcus;	Bacteria	Firmicutes	Bacilli	Lactobacillales	Aerococcaceae	Aerococcus
neg.ctrl_PCR_5_13861926	k__Bacteria;p__Firmicutes;c__Bacilli;o__Lactobacillales;f__Aerococcaceae;g__Aerococcus;	Bacteria	Firmicutes	Bacilli	Lactobacillales	Aerococcaceae	Aerococcus
neg.ctrl_PCR_5_13878575	k__Bacteria;p__Firmicutes;c__Bacilli;o__Lactobacillales;f__Aerococcaceae;g__Aerococcus;	Bacteria	Firmicutes	Bacilli	Lactobacillales	Aerococcaceae	Aerococcus
neg.ctrl_PCR_5_14083622	k__Bacteria;p__Firmicutes;c__Bacilli;o__Lactobacillales;f__Aerococcaceae;g__Aerococcus;	Bacteria	Firmicutes	Bacilli	Lactobacillales	Aerococcaceae	Aerococcus
neg.ctrl_PCR_5_14154558	k__Bacteria;p__Firmicutes;c__Bacilli;o__Lactobacillales;f__Aerococcaceae;g__Aerococcus;	Bacteria	Firmicutes	Bacilli	Lactobacillales	Aerococcaceae	Aerococcus
neg.ctrl4_2102293	k__Bacteria;p__Firmicutes;c__Bacilli;o__Lactobacillales;f__Aerococcaceae;g__Aerococcus;	Bacteria	Firmicutes	Bacilli	Lactobacillales	Aerococcaceae	Aerococcus
empty3_1230562	k__Bacteria;p__Firmicutes;c__Bacilli;o__Lactobacillales;f__Enterococcaceae;g__Enterococcus;	Bacteria	Firmicutes	Bacilli	Lactobacillales	Enterococcaceae	Enterococcus
empty3_1424826	k__Bacteria;p__Firmicutes;c__Bacilli;o__Lactobacillales;f__Enterococcaceae;g__Enterococcus;	Bacteria	Firmicutes	Bacilli	Lactobacillales	Enterococcaceae	Enterococcus
empty3_1454900	k__Bacteria;p__Firmicutes;c__Bacilli;o__Lactobacillales;f__Enterococcaceae;g__Enterococcus;	Bacteria	Firmicutes	Bacilli	Lactobacillales	Enterococcaceae	Enterococcus
empty3_1547341	k__Bacteria;p__Firmicutes;c__Bacilli;o__Lactobacillales;f__Enterococcaceae;g__Enterococcus;	Bacteria	Firmicutes	Bacilli	Lactobacillales	Enterococcaceae	Enterococcus
empty3_1547564	k__Bacteria;p__Firmicutes;c__Bacilli;o__Lactobacillales;f__Enterococcaceae;g__Enterococcus;	Bacteria	Firmicutes	Bacilli	Lactobacillales	Enterococcaceae	Enterococcus
empty3_1551262	k__Bacteria;p__Firmicutes;c__Bacilli;o__Lactobacillales;f__Enterococcaceae;g__Enterococcus;	Bacteria	Firmicutes	Bacilli	Lactobacillales	Enterococcaceae	Enterococcus
empty3_1609595	k__Bacteria;p__Firmicutes;c__Bacilli;o__Lactobacillales;f__Enterococcaceae;g__Enterococcus;	Bacteria	Firmicutes	Bacilli	Lactobacillales	Enterococcaceae	Enterococcus
empty3_1729543	k__Bacteria;p__Firmicutes;c__Bacilli;o__Lactobacillales;f__Enterococcaceae;g__Enterococcus;	Bacteria	Firmicutes	Bacilli	Lactobacillales	Enterococcaceae	Enterococcus
empty3_1857393	k__Bacteria;p__Firmicutes;c__Bacilli;o__Lactobacillales;f__Enterococcaceae;g__Enterococcus;	Bacteria	Firmicutes	Bacilli	Lactobacillales	Enterococcaceae	Enterococcus
empty3_2001466	k__Bacteria;p__Firmicutes;c__Bacilli;o__Lactobacillales;f__Enterococcaceae;g__Enterococcus;	Bacteria	Firmicutes	Bacilli	Lactobacillales	Enterococcaceae	Enterococcus
empty3_2066904	k__Bacteria;p__Firmicutes;c__Bacilli;o__Lactobacillales;f__Enterococcaceae;g__Enterococcus;	Bacteria	Firmicutes	Bacilli	Lactobacillales	Enterococcaceae	Enterococcus
empty3_2130187	k__Bacteria;p__Firmicutes;c__Bacilli;o__Lactobacillales;f__Enterococcaceae;g__Enterococcus;	Bacteria	Firmicutes	Bacilli	Lactobacillales	Enterococcaceae	Enterococcus
empty3_2209788	k__Bacteria;p__Firmicutes;c__Bacilli;o__Lactobacillales;f__Enterococcaceae;g__Enterococcus;	Bacteria	Firmicutes	Bacilli	Lactobacillales	Enterococcaceae	Enterococcus
empty3_2237796	k__Bacteria;p__Firmicutes;c__Bacilli;o__Lactobacillales;f__Enterococcaceae;g__Enterococcus;	Bacteria	Firmicutes	Bacilli	Lactobacillales	Enterococcaceae	Enterococcus
empty3_2280990	k__Bacteria;p__Firmicutes;c__Bacilli;o__Lactobacillales;f__Enterococcaceae;g__Enterococcus;	Bacteria	Firmicutes	Bacilli	Lactobacillales	Enterococcaceae	Enterococcus
empty3_2306381	k__Bacteria;p__Firmicutes;c__Bacilli;o__Lactobacillales;f__Enterococcaceae;g__Enterococcus;	Bacteria	Firmicutes	Bacilli	Lactobacillales	Enterococcaceae	Enterococcus
empty3_2320440	k__Bacteria;p__Firmicutes;c__Bacilli;o__Lactobacillales;f__Enterococcaceae;g__Enterococcus;	Bacteria	Firmicutes	Bacilli	Lactobacillales	Enterococcaceae	Enterococcus
empty3_2328395	k__Bacteria;p__Firmicutes;c__Bacilli;o__Lactobacillales;f__Enterococcaceae;g__Enterococcus;	Bacteria	Firmicutes	Bacilli	Lactobacillales	Enterococcaceae	Enterococcus
empty3_2442698	k__Bacteria;p__Firmicutes;c__Bacilli;o__Lactobacillales;f__Enterococcaceae;g__Enterococcus;	Bacteria	Firmicutes	Bacilli	Lactobacillales	Enterococcaceae	Enterococcus
neg.ctrl5_5885877	k__Bacteria;p__Firmicutes;c__Bacilli;o__Lactobacillales;f__Enterococcaceae;g__Enterococcus;	Bacteria	Firmicutes	Bacilli	Lactobacillales	Enterococcaceae	Enterococcus
empty3_1442801	k__Bacteria;p__Firmicutes;c__Bacilli;o__Lactobacillales;f__Streptococcaceae;g__Streptococcus;	Bacteria	Firmicutes	Bacilli	Lactobacillales	Streptococcaceae	Streptococcus
empty3_1959715	k__Bacteria;p__Firmicutes;c__Bacilli;o__Lactobacillales;f__Streptococcaceae;g__Streptococcus;	Bacteria	Firmicutes	Bacilli	Lactobacillales	Streptococcaceae	Streptococcus
neg.ctrl4_2193871	k__Bacteria;p__Firmicutes;c__Bacilli;o__Lactobacillales;f__Streptococcaceae;g__Streptococcus;	Bacteria	Firmicutes	Bacilli	Lactobacillales	Streptococcaceae	Streptococcus
neg.ctrl_PCR_5_11023821	k__Bacteria;p__Firmicutes;c__Bacilli;	Bacteria	Firmicutes	Bacilli
empty3_1492833	k__Bacteria;p__Firmicutes;c__Clostridia;o__Clostridiales;f__[Tissierellaceae];g__Anaerococcus;	Bacteria	Firmicutes	Clostridia	Clostridiales	[Tissierellaceae]	Anaerococcus
empty3_2228518	k__Bacteria;p__Firmicutes;c__Clostridia;o__Clostridiales;f__[Tissierellaceae];g__Finegoldia;	Bacteria	Firmicutes	Clostridia	Clostridiales	[Tissierellaceae]	Finegoldia
empty3_2056219	k__Bacteria;p__Firmicutes;c__Clostridia;o__Clostridiales;f__[Tissierellaceae];g__Peptoniphilus;	Bacteria	Firmicutes	Clostridia	Clostridiales	[Tissierellaceae]	Peptoniphilus
empty3_1815439	k__Bacteria;p__Firmicutes;c__Clostridia;o__Clostridiales;f__Clostridiaceae;g__Clostridium;	Bacteria	Firmicutes	Clostridia	Clostridiales	Clostridiaceae	Clostridium
empty3_2298142	k__Bacteria;p__Firmicutes;c__Clostridia;o__Clostridiales;f__Clostridiaceae;g__Clostridium;	Bacteria	Firmicutes	Clostridia	Clostridiales	Clostridiaceae	Clostridium
empty3_1751338	k__Bacteria;p__Firmicutes;c__Clostridia;o__Clostridiales;f__Lachnospiraceae;g__Blautia;s__producta;	Bacteria	Firmicutes	Clostridia	Clostridiales	Lachnospiraceae	Blautia	producta
empty3_1326201	k__Bacteria;p__Firmicutes;c__Clostridia;o__Clostridiales;f__Lachnospiraceae;g__Dorea;	Bacteria	Firmicutes	Clostridia	Clostridiales	Lachnospiraceae	Dorea
neg.ctrl7_2324716	k__Bacteria;p__Firmicutes;c__Clostridia;o__Clostridiales;f__Lachnospiraceae;g__Roseburia;	Bacteria	Firmicutes	Clostridia	Clostridiales	Lachnospiraceae	Roseburia
neg.ctrl7_2633532	k__Bacteria;p__Firmicutes;c__Clostridia;o__Clostridiales;f__Lachnospiraceae;g__Roseburia;	Bacteria	Firmicutes	Clostridia	Clostridiales	Lachnospiraceae	Roseburia
neg.ctrl7_3519652	k__Bacteria;p__Firmicutes;c__Clostridia;o__Clostridiales;f__Lachnospiraceae;g__Roseburia;	Bacteria	Firmicutes	Clostridia	Clostridiales	Lachnospiraceae	Roseburia
neg.ctrl7_3695176	k__Bacteria;p__Firmicutes;c__Clostridia;o__Clostridiales;f__Lachnospiraceae;g__Roseburia;	Bacteria	Firmicutes	Clostridia	Clostridiales	Lachnospiraceae	Roseburia
neg.ctrl7_4103335	k__Bacteria;p__Firmicutes;c__Clostridia;o__Clostridiales;f__Lachnospiraceae;g__Roseburia;	Bacteria	Firmicutes	Clostridia	Clostridiales	Lachnospiraceae	Roseburia
neg.ctrl7_4145619	k__Bacteria;p__Firmicutes;c__Clostridia;o__Clostridiales;f__Lachnospiraceae;g__Roseburia;	Bacteria	Firmicutes	Clostridia	Clostridiales	Lachnospiraceae	Roseburia
neg.ctrl7_4158628	k__Bacteria;p__Firmicutes;c__Clostridia;o__Clostridiales;f__Lachnospiraceae;g__Roseburia;	Bacteria	Firmicutes	Clostridia	Clostridiales	Lachnospiraceae	Roseburia
empty3_1341881	k__Bacteria;p__Firmicutes;c__Clostridia;o__Clostridiales;f__Lachnospiraceae;	Bacteria	Firmicutes	Clostridia	Clostridiales	Lachnospiraceae
empty3_1406354	k__Bacteria;p__Firmicutes;c__Clostridia;o__Clostridiales;f__Lachnospiraceae;	Bacteria	Firmicutes	Clostridia	Clostridiales	Lachnospiraceae
empty3_1417112	k__Bacteria;p__Firmicutes;c__Clostridia;o__Clostridiales;f__Lachnospiraceae;	Bacteria	Firmicutes	Clostridia	Clostridiales	Lachnospiraceae
empty3_1447629	k__Bacteria;p__Firmicutes;c__Clostridia;o__Clostridiales;f__Lachnospiraceae;	Bacteria	Firmicutes	Clostridia	Clostridiales	Lachnospiraceae
empty3_1459479	k__Bacteria;p__Firmicutes;c__Clostridia;o__Clostridiales;f__Lachnospiraceae;	Bacteria	Firmicutes	Clostridia	Clostridiales	Lachnospiraceae
empty3_1677060	k__Bacteria;p__Firmicutes;c__Clostridia;o__Clostridiales;f__Lachnospiraceae;	Bacteria	Firmicutes	Clostridia	Clostridiales	Lachnospiraceae
empty3_1692247	k__Bacteria;p__Firmicutes;c__Clostridia;o__Clostridiales;f__Lachnospiraceae;	Bacteria	Firmicutes	Clostridia	Clostridiales	Lachnospiraceae
empty3_1886482	k__Bacteria;p__Firmicutes;c__Clostridia;o__Clostridiales;f__Lachnospiraceae;	Bacteria	Firmicutes	Clostridia	Clostridiales	Lachnospiraceae
empty3_1987471	k__Bacteria;p__Firmicutes;c__Clostridia;o__Clostridiales;f__Lachnospiraceae;	Bacteria	Firmicutes	Clostridia	Clostridiales	Lachnospiraceae
empty3_2132224	k__Bacteria;p__Firmicutes;c__Clostridia;o__Clostridiales;f__Lachnospiraceae;	Bacteria	Firmicutes	Clostridia	Clostridiales	Lachnospiraceae
empty3_2346379	k__Bacteria;p__Firmicutes;c__Clostridia;o__Clostridiales;f__Lachnospiraceae;	Bacteria	Firmicutes	Clostridia	Clostridiales	Lachnospiraceae
empty3_2356437	k__Bacteria;p__Firmicutes;c__Clostridia;o__Clostridiales;f__Lachnospiraceae;	Bacteria	Firmicutes	Clostridia	Clostridiales	Lachnospiraceae
neg.ctrl_PCR_2_2564766	k__Bacteria;p__Firmicutes;c__Clostridia;o__Clostridiales;f__Lachnospiraceae;	Bacteria	Firmicutes	Clostridia	Clostridiales	Lachnospiraceae
neg.ctrl_PCR_2_3510839	k__Bacteria;p__Firmicutes;c__Clostridia;o__Clostridiales;f__Lachnospiraceae;	Bacteria	Firmicutes	Clostridia	Clostridiales	Lachnospiraceae
neg.ctrl_PCR_2_3685253	k__Bacteria;p__Firmicutes;c__Clostridia;o__Clostridiales;f__Lachnospiraceae;	Bacteria	Firmicutes	Clostridia	Clostridiales	Lachnospiraceae
neg.ctrl_PCR_2_4001656	k__Bacteria;p__Firmicutes;c__Clostridia;o__Clostridiales;f__Lachnospiraceae;	Bacteria	Firmicutes	Clostridia	Clostridiales	Lachnospiraceae
neg.ctrl_PCR_2_4218761	k__Bacteria;p__Firmicutes;c__Clostridia;o__Clostridiales;f__Lachnospiraceae;	Bacteria	Firmicutes	Clostridia	Clostridiales	Lachnospiraceae
neg.ctrl4_2312200	k__Bacteria;p__Firmicutes;c__Clostridia;o__Clostridiales;f__Lachnospiraceae;	Bacteria	Firmicutes	Clostridia	Clostridiales	Lachnospiraceae
neg.ctrl7_3565325	k__Bacteria;p__Firmicutes;c__Clostridia;o__Clostridiales;f__Lachnospiraceae;	Bacteria	Firmicutes	Clostridia	Clostridiales	Lachnospiraceae
neg.ctrl6_3067839	k__Bacteria;p__Firmicutes;c__Clostridia;o__Clostridiales;f__Ruminococcaceae;g__Oscillospira;	Bacteria	Firmicutes	Clostridia	Clostridiales	Ruminococcaceae	Oscillospira
empty2_3430403	k__Bacteria;p__Firmicutes;c__Clostridia;o__Clostridiales;f__Ruminococcaceae;g__Ruminococcus;s__bromii;	Bacteria	Firmicutes	Clostridia	Clostridiales	Ruminococcaceae	Ruminococcus	bromii
empty3_1594236	k__Bacteria;p__Firmicutes;c__Clostridia;o__Clostridiales;f__Ruminococcaceae;g__Ruminococcus;	Bacteria	Firmicutes	Clostridia	Clostridiales	Ruminococcaceae	Ruminococcus
empty3_2013549	k__Bacteria;p__Firmicutes;c__Clostridia;o__Clostridiales;f__Ruminococcaceae;g__Ruminococcus;	Bacteria	Firmicutes	Clostridia	Clostridiales	Ruminococcaceae	Ruminococcus
empty3_2347212	k__Bacteria;p__Firmicutes;c__Clostridia;o__Clostridiales;f__Ruminococcaceae;g__Ruminococcus;	Bacteria	Firmicutes	Clostridia	Clostridiales	Ruminococcaceae	Ruminococcus
empty3_2366372	k__Bacteria;p__Firmicutes;c__Clostridia;o__Clostridiales;f__Ruminococcaceae;g__Ruminococcus;	Bacteria	Firmicutes	Clostridia	Clostridiales	Ruminococcaceae	Ruminococcus
neg.ctrl6_1930388	k__Bacteria;p__Firmicutes;c__Clostridia;o__Clostridiales;f__Ruminococcaceae;g__Ruminococcus;	Bacteria	Firmicutes	Clostridia	Clostridiales	Ruminococcaceae	Ruminococcus
neg.ctrl6_2043000	k__Bacteria;p__Firmicutes;c__Clostridia;o__Clostridiales;f__Ruminococcaceae;g__Ruminococcus;	Bacteria	Firmicutes	Clostridia	Clostridiales	Ruminococcaceae	Ruminococcus
neg.ctrl6_2368880	k__Bacteria;p__Firmicutes;c__Clostridia;o__Clostridiales;f__Ruminococcaceae;g__Ruminococcus;	Bacteria	Firmicutes	Clostridia	Clostridiales	Ruminococcaceae	Ruminococcus
neg.ctrl6_3035516	k__Bacteria;p__Firmicutes;c__Clostridia;o__Clostridiales;f__Ruminococcaceae;g__Ruminococcus;	Bacteria	Firmicutes	Clostridia	Clostridiales	Ruminococcaceae	Ruminococcus
neg.ctrl6_3950942	k__Bacteria;p__Firmicutes;c__Clostridia;o__Clostridiales;f__Ruminococcaceae;g__Ruminococcus;	Bacteria	Firmicutes	Clostridia	Clostridiales	Ruminococcaceae	Ruminococcus
neg.ctrl6_4141541	k__Bacteria;p__Firmicutes;c__Clostridia;o__Clostridiales;f__Ruminococcaceae;g__Ruminococcus;	Bacteria	Firmicutes	Clostridia	Clostridiales	Ruminococcaceae	Ruminococcus
neg.ctrl5_6109456	k__Bacteria;p__Firmicutes;c__Clostridia;o__Clostridiales;f__Ruminococcaceae;	Bacteria	Firmicutes	Clostridia	Clostridiales	Ruminococcaceae
neg.ctrl5_6727198	k__Bacteria;p__Firmicutes;c__Clostridia;o__Clostridiales;f__Ruminococcaceae;	Bacteria	Firmicutes	Clostridia	Clostridiales	Ruminococcaceae
neg.ctrl5_6918837	k__Bacteria;p__Firmicutes;c__Clostridia;o__Clostridiales;f__Ruminococcaceae;	Bacteria	Firmicutes	Clostridia	Clostridiales	Ruminococcaceae
neg.ctrl5_7473662	k__Bacteria;p__Firmicutes;c__Clostridia;o__Clostridiales;f__Ruminococcaceae;	Bacteria	Firmicutes	Clostridia	Clostridiales	Ruminococcaceae
empty3_1226677	k__Bacteria;p__Firmicutes;c__Clostridia;o__Clostridiales;f__Veillonellaceae;g__Acidaminococcus;	Bacteria	Firmicutes	Clostridia	Clostridiales	Veillonellaceae	Acidaminococcus
empty3_1261883	k__Bacteria;p__Firmicutes;c__Clostridia;o__Clostridiales;f__Veillonellaceae;g__Acidaminococcus;	Bacteria	Firmicutes	Clostridia	Clostridiales	Veillonellaceae	Acidaminococcus
empty3_1269932	k__Bacteria;p__Firmicutes;c__Clostridia;o__Clostridiales;f__Veillonellaceae;g__Acidaminococcus;	Bacteria	Firmicutes	Clostridia	Clostridiales	Veillonellaceae	Acidaminococcus
empty3_2099423	k__Bacteria;p__Firmicutes;c__Clostridia;o__Clostridiales;f__Veillonellaceae;g__Acidaminococcus;	Bacteria	Firmicutes	Clostridia	Clostridiales	Veillonellaceae	Acidaminococcus
empty3_1586920	k__Bacteria;p__Firmicutes;c__Clostridia;o__Clostridiales;f__Veillonellaceae;g__Dialister;	Bacteria	Firmicutes	Clostridia	Clostridiales	Veillonellaceae	Dialister
empty3_1834859	k__Bacteria;p__Firmicutes;c__Clostridia;o__Clostridiales;f__Veillonellaceae;g__Dialister;	Bacteria	Firmicutes	Clostridia	Clostridiales	Veillonellaceae	Dialister
empty3_2347463	k__Bacteria;p__Firmicutes;c__Clostridia;o__Clostridiales;f__Veillonellaceae;g__Dialister;	Bacteria	Firmicutes	Clostridia	Clostridiales	Veillonellaceae	Dialister
neg.ctrl4_2207910	k__Bacteria;p__Firmicutes;c__Clostridia;o__Clostridiales;f__Veillonellaceae;g__Veillonella;	Bacteria	Firmicutes	Clostridia	Clostridiales	Veillonellaceae	Veillonella
empty3_1507064	k__Bacteria;p__Firmicutes;c__Clostridia;o__Clostridiales;	Bacteria	Firmicutes	Clostridia	Clostridiales
neg.ctrl6_2939842	k__Bacteria;p__Firmicutes;c__Erysipelotrichi;o__Erysipelotrichales;f__Erysipelotrichaceae;g__[Eubacterium];s__dolichum;	Bacteria	Firmicutes	Erysipelotrichi	Erysipelotrichales	Erysipelotrichaceae	[Eubacterium]	dolichum
empty3_2011520	k__Bacteria;p__Firmicutes;c__Erysipelotrichi;o__Erysipelotrichales;f__Erysipelotrichaceae;g__Bulleidia;s__moorei;	Bacteria	Firmicutes	Erysipelotrichi	Erysipelotrichales	Erysipelotrichaceae	Bulleidia	moorei
empty3_2111509	k__Bacteria;p__Firmicutes;c__Erysipelotrichi;o__Erysipelotrichales;f__Erysipelotrichaceae;g__Bulleidia;s__moorei;	Bacteria	Firmicutes	Erysipelotrichi	Erysipelotrichales	Erysipelotrichaceae	Bulleidia	moorei
neg.ctrl_PCR_4_12415334	Bacteria;Proteobacteria;Alphaproteobacteria;Caulobacterales;Caulobacteraceae;Brevundimonas;	Bacteria	Proteobacteria	Alphaproteobacteria	Caulobacterales	Caulobacteraceae	Brevundimonas
neg.ctrl_PCR_5_13320283	k__Bacteria;p__Proteobacteria;c__Alphaproteobacteria;o__Caulobacterales;f__Caulobacteraceae;g__Brevundimonas;s__diminuta;	Bacteria	Proteobacteria	Alphaproteobacteria	Caulobacterales	Caulobacteraceae	Brevundimonas	diminuta
empty3_1246426	k__Bacteria;p__Proteobacteria;c__Alphaproteobacteria;o__Caulobacterales;f__Caulobacteraceae;	Bacteria	Proteobacteria	Alphaproteobacteria	Caulobacterales	Caulobacteraceae
neg.ctrl_PCR_2_4476124	k__Bacteria;p__Proteobacteria;c__Alphaproteobacteria;o__Caulobacterales;f__Caulobacteraceae;	Bacteria	Proteobacteria	Alphaproteobacteria	Caulobacterales	Caulobacteraceae
neg.ctrl_PCR_4_10779025	k__Bacteria;p__Proteobacteria;c__Alphaproteobacteria;o__Caulobacterales;f__Caulobacteraceae;	Bacteria	Proteobacteria	Alphaproteobacteria	Caulobacterales	Caulobacteraceae
neg.ctrl_PCR_4_10991101	k__Bacteria;p__Proteobacteria;c__Alphaproteobacteria;o__Caulobacterales;f__Caulobacteraceae;	Bacteria	Proteobacteria	Alphaproteobacteria	Caulobacterales	Caulobacteraceae
neg.ctrl_PCR_4_11264495	k__Bacteria;p__Proteobacteria;c__Alphaproteobacteria;o__Caulobacterales;f__Caulobacteraceae;	Bacteria	Proteobacteria	Alphaproteobacteria	Caulobacterales	Caulobacteraceae
neg.ctrl_PCR_4_11975623	k__Bacteria;p__Proteobacteria;c__Alphaproteobacteria;o__Caulobacterales;f__Caulobacteraceae;	Bacteria	Proteobacteria	Alphaproteobacteria	Caulobacterales	Caulobacteraceae
neg.ctrl_PCR_4_12120140	k__Bacteria;p__Proteobacteria;c__Alphaproteobacteria;o__Caulobacterales;f__Caulobacteraceae;	Bacteria	Proteobacteria	Alphaproteobacteria	Caulobacterales	Caulobacteraceae
neg.ctrl_PCR_4_12270432	k__Bacteria;p__Proteobacteria;c__Alphaproteobacteria;o__Caulobacterales;f__Caulobacteraceae;	Bacteria	Proteobacteria	Alphaproteobacteria	Caulobacterales	Caulobacteraceae
neg.ctrl_PCR_4_12405425	k__Bacteria;p__Proteobacteria;c__Alphaproteobacteria;o__Caulobacterales;f__Caulobacteraceae;	Bacteria	Proteobacteria	Alphaproteobacteria	Caulobacterales	Caulobacteraceae
neg.ctrl_PCR_4_12885678	k__Bacteria;p__Proteobacteria;c__Alphaproteobacteria;o__Caulobacterales;f__Caulobacteraceae;	Bacteria	Proteobacteria	Alphaproteobacteria	Caulobacterales	Caulobacteraceae
neg.ctrl_PCR_4_7575401	k__Bacteria;p__Proteobacteria;c__Alphaproteobacteria;o__Caulobacterales;f__Caulobacteraceae;	Bacteria	Proteobacteria	Alphaproteobacteria	Caulobacterales	Caulobacteraceae
neg.ctrl_PCR_4_7659258	k__Bacteria;p__Proteobacteria;c__Alphaproteobacteria;o__Caulobacterales;f__Caulobacteraceae;	Bacteria	Proteobacteria	Alphaproteobacteria	Caulobacterales	Caulobacteraceae
neg.ctrl_PCR_4_7847967	k__Bacteria;p__Proteobacteria;c__Alphaproteobacteria;o__Caulobacterales;f__Caulobacteraceae;	Bacteria	Proteobacteria	Alphaproteobacteria	Caulobacterales	Caulobacteraceae
neg.ctrl_PCR_4_8273099	k__Bacteria;p__Proteobacteria;c__Alphaproteobacteria;o__Caulobacterales;f__Caulobacteraceae;	Bacteria	Proteobacteria	Alphaproteobacteria	Caulobacterales	Caulobacteraceae
neg.ctrl_PCR_4_8821197	k__Bacteria;p__Proteobacteria;c__Alphaproteobacteria;o__Caulobacterales;f__Caulobacteraceae;	Bacteria	Proteobacteria	Alphaproteobacteria	Caulobacterales	Caulobacteraceae
neg.ctrl_PCR_5_10236300	k__Bacteria;p__Proteobacteria;c__Alphaproteobacteria;o__Caulobacterales;f__Caulobacteraceae;	Bacteria	Proteobacteria	Alphaproteobacteria	Caulobacterales	Caulobacteraceae
neg.ctrl_PCR_5_10290853	k__Bacteria;p__Proteobacteria;c__Alphaproteobacteria;o__Caulobacterales;f__Caulobacteraceae;	Bacteria	Proteobacteria	Alphaproteobacteria	Caulobacterales	Caulobacteraceae
neg.ctrl_PCR_5_10337763	k__Bacteria;p__Proteobacteria;c__Alphaproteobacteria;o__Caulobacterales;f__Caulobacteraceae;	Bacteria	Proteobacteria	Alphaproteobacteria	Caulobacterales	Caulobacteraceae
neg.ctrl_PCR_5_10477028	k__Bacteria;p__Proteobacteria;c__Alphaproteobacteria;o__Caulobacterales;f__Caulobacteraceae;	Bacteria	Proteobacteria	Alphaproteobacteria	Caulobacterales	Caulobacteraceae
neg.ctrl_PCR_5_10929562	k__Bacteria;p__Proteobacteria;c__Alphaproteobacteria;o__Caulobacterales;f__Caulobacteraceae;	Bacteria	Proteobacteria	Alphaproteobacteria	Caulobacterales	Caulobacteraceae
neg.ctrl_PCR_5_11176237	k__Bacteria;p__Proteobacteria;c__Alphaproteobacteria;o__Caulobacterales;f__Caulobacteraceae;	Bacteria	Proteobacteria	Alphaproteobacteria	Caulobacterales	Caulobacteraceae
neg.ctrl_PCR_5_11921211	k__Bacteria;p__Proteobacteria;c__Alphaproteobacteria;o__Caulobacterales;f__Caulobacteraceae;	Bacteria	Proteobacteria	Alphaproteobacteria	Caulobacterales	Caulobacteraceae
neg.ctrl_PCR_5_11982443	k__Bacteria;p__Proteobacteria;c__Alphaproteobacteria;o__Caulobacterales;f__Caulobacteraceae;	Bacteria	Proteobacteria	Alphaproteobacteria	Caulobacterales	Caulobacteraceae
neg.ctrl_PCR_5_12304477	k__Bacteria;p__Proteobacteria;c__Alphaproteobacteria;o__Caulobacterales;f__Caulobacteraceae;	Bacteria	Proteobacteria	Alphaproteobacteria	Caulobacterales	Caulobacteraceae
neg.ctrl_PCR_5_12591797	k__Bacteria;p__Proteobacteria;c__Alphaproteobacteria;o__Caulobacterales;f__Caulobacteraceae;	Bacteria	Proteobacteria	Alphaproteobacteria	Caulobacterales	Caulobacteraceae
neg.ctrl_PCR_5_13844131	k__Bacteria;p__Proteobacteria;c__Alphaproteobacteria;o__Caulobacterales;f__Caulobacteraceae;	Bacteria	Proteobacteria	Alphaproteobacteria	Caulobacterales	Caulobacteraceae
neg.ctrl_PCR_5_13844645	k__Bacteria;p__Proteobacteria;c__Alphaproteobacteria;o__Caulobacterales;f__Caulobacteraceae;	Bacteria	Proteobacteria	Alphaproteobacteria	Caulobacterales	Caulobacteraceae
neg.ctrl_PCR_5_14132109	k__Bacteria;p__Proteobacteria;c__Alphaproteobacteria;o__Caulobacterales;f__Caulobacteraceae;	Bacteria	Proteobacteria	Alphaproteobacteria	Caulobacterales	Caulobacteraceae
neg.ctrl7_3228263	k__Bacteria;p__Proteobacteria;c__Alphaproteobacteria;o__Caulobacterales;f__Caulobacteraceae;	Bacteria	Proteobacteria	Alphaproteobacteria	Caulobacterales	Caulobacteraceae
neg.ctrl7_3913562	k__Bacteria;p__Proteobacteria;c__Alphaproteobacteria;o__Caulobacterales;f__Caulobacteraceae;	Bacteria	Proteobacteria	Alphaproteobacteria	Caulobacterales	Caulobacteraceae
neg.ctrl_PCR_2_3116099	k__Bacteria;p__Proteobacteria;c__Alphaproteobacteria;o__Rhizobiales;f__Bradyrhizobiaceae;g__Afipia;	Bacteria	Proteobacteria	Alphaproteobacteria	Rhizobiales	Bradyrhizobiaceae	Afipia
neg.ctrl_PCR_2_3176479	k__Bacteria;p__Proteobacteria;c__Alphaproteobacteria;o__Rhizobiales;f__Bradyrhizobiaceae;g__Afipia;	Bacteria	Proteobacteria	Alphaproteobacteria	Rhizobiales	Bradyrhizobiaceae	Afipia
neg.ctrl_PCR_2_3975813	k__Bacteria;p__Proteobacteria;c__Alphaproteobacteria;o__Rhizobiales;f__Bradyrhizobiaceae;g__Afipia;	Bacteria	Proteobacteria	Alphaproteobacteria	Rhizobiales	Bradyrhizobiaceae	Afipia
neg.ctrl_PCR_3_5011055	k__Bacteria;p__Proteobacteria;c__Alphaproteobacteria;o__Rhizobiales;f__Bradyrhizobiaceae;g__Afipia;	Bacteria	Proteobacteria	Alphaproteobacteria	Rhizobiales	Bradyrhizobiaceae	Afipia
neg.ctrl_PCR_3_6348730	k__Bacteria;p__Proteobacteria;c__Alphaproteobacteria;o__Rhizobiales;f__Bradyrhizobiaceae;g__Afipia;	Bacteria	Proteobacteria	Alphaproteobacteria	Rhizobiales	Bradyrhizobiaceae	Afipia
neg.ctrl_PCR_3_6481919	k__Bacteria;p__Proteobacteria;c__Alphaproteobacteria;o__Rhizobiales;f__Bradyrhizobiaceae;g__Afipia;	Bacteria	Proteobacteria	Alphaproteobacteria	Rhizobiales	Bradyrhizobiaceae	Afipia
neg.ctrl_PCR_3_7293425	k__Bacteria;p__Proteobacteria;c__Alphaproteobacteria;o__Rhizobiales;f__Bradyrhizobiaceae;g__Afipia;	Bacteria	Proteobacteria	Alphaproteobacteria	Rhizobiales	Bradyrhizobiaceae	Afipia
neg.ctrl_PCR_3_7789835	k__Bacteria;p__Proteobacteria;c__Alphaproteobacteria;o__Rhizobiales;f__Bradyrhizobiaceae;g__Afipia;	Bacteria	Proteobacteria	Alphaproteobacteria	Rhizobiales	Bradyrhizobiaceae	Afipia
neg.ctrl_PCR_5_10741951	k__Bacteria;p__Proteobacteria;c__Alphaproteobacteria;o__Rhizobiales;f__Bradyrhizobiaceae;g__Afipia;	Bacteria	Proteobacteria	Alphaproteobacteria	Rhizobiales	Bradyrhizobiaceae	Afipia
neg.ctrl_PCR_5_12216283	k__Bacteria;p__Proteobacteria;c__Alphaproteobacteria;o__Rhizobiales;f__Bradyrhizobiaceae;g__Afipia;	Bacteria	Proteobacteria	Alphaproteobacteria	Rhizobiales	Bradyrhizobiaceae	Afipia
neg.ctrl_PCR_5_12462805	k__Bacteria;p__Proteobacteria;c__Alphaproteobacteria;o__Rhizobiales;f__Bradyrhizobiaceae;g__Afipia;	Bacteria	Proteobacteria	Alphaproteobacteria	Rhizobiales	Bradyrhizobiaceae	Afipia
neg.ctrl_PCR_5_12819151	k__Bacteria;p__Proteobacteria;c__Alphaproteobacteria;o__Rhizobiales;f__Bradyrhizobiaceae;g__Afipia;	Bacteria	Proteobacteria	Alphaproteobacteria	Rhizobiales	Bradyrhizobiaceae	Afipia
neg.ctrl_PCR_5_13245212	k__Bacteria;p__Proteobacteria;c__Alphaproteobacteria;o__Rhizobiales;f__Bradyrhizobiaceae;g__Afipia;	Bacteria	Proteobacteria	Alphaproteobacteria	Rhizobiales	Bradyrhizobiaceae	Afipia
neg.ctrl_PCR_5_13907538	k__Bacteria;p__Proteobacteria;c__Alphaproteobacteria;o__Rhizobiales;f__Bradyrhizobiaceae;g__Afipia;	Bacteria	Proteobacteria	Alphaproteobacteria	Rhizobiales	Bradyrhizobiaceae	Afipia
neg.ctrl_PCR_5_13972241	k__Bacteria;p__Proteobacteria;c__Alphaproteobacteria;o__Rhizobiales;f__Bradyrhizobiaceae;g__Afipia;	Bacteria	Proteobacteria	Alphaproteobacteria	Rhizobiales	Bradyrhizobiaceae	Afipia
neg.ctrl5_4996334	k__Bacteria;p__Proteobacteria;c__Alphaproteobacteria;o__Rhizobiales;f__Bradyrhizobiaceae;g__Afipia;	Bacteria	Proteobacteria	Alphaproteobacteria	Rhizobiales	Bradyrhizobiaceae	Afipia
neg.ctrl_PCR_3_7393608	k__Bacteria;p__Proteobacteria;c__Alphaproteobacteria;o__Rhizobiales;f__Brucellaceae;g__Ochrobactrum;	Bacteria	Proteobacteria	Alphaproteobacteria	Rhizobiales	Brucellaceae	Ochrobactrum
neg.ctrl_PCR_3_7676535	k__Bacteria;p__Proteobacteria;c__Alphaproteobacteria;o__Rhizobiales;f__Brucellaceae;g__Ochrobactrum;	Bacteria	Proteobacteria	Alphaproteobacteria	Rhizobiales	Brucellaceae	Ochrobactrum
neg.ctrl_PCR_4_10015354	k__Bacteria;p__Proteobacteria;c__Alphaproteobacteria;o__Rhizobiales;f__Brucellaceae;g__Ochrobactrum;	Bacteria	Proteobacteria	Alphaproteobacteria	Rhizobiales	Brucellaceae	Ochrobactrum
neg.ctrl_PCR_4_10045878	k__Bacteria;p__Proteobacteria;c__Alphaproteobacteria;o__Rhizobiales;f__Brucellaceae;g__Ochrobactrum;	Bacteria	Proteobacteria	Alphaproteobacteria	Rhizobiales	Brucellaceae	Ochrobactrum
neg.ctrl_PCR_4_10138253	k__Bacteria;p__Proteobacteria;c__Alphaproteobacteria;o__Rhizobiales;f__Brucellaceae;g__Ochrobactrum;	Bacteria	Proteobacteria	Alphaproteobacteria	Rhizobiales	Brucellaceae	Ochrobactrum
neg.ctrl_PCR_4_10229098	k__Bacteria;p__Proteobacteria;c__Alphaproteobacteria;o__Rhizobiales;f__Brucellaceae;g__Ochrobactrum;	Bacteria	Proteobacteria	Alphaproteobacteria	Rhizobiales	Brucellaceae	Ochrobactrum
neg.ctrl_PCR_4_10344431	k__Bacteria;p__Proteobacteria;c__Alphaproteobacteria;o__Rhizobiales;f__Brucellaceae;g__Ochrobactrum;	Bacteria	Proteobacteria	Alphaproteobacteria	Rhizobiales	Brucellaceae	Ochrobactrum
neg.ctrl_PCR_4_10432276	k__Bacteria;p__Proteobacteria;c__Alphaproteobacteria;o__Rhizobiales;f__Brucellaceae;g__Ochrobactrum;	Bacteria	Proteobacteria	Alphaproteobacteria	Rhizobiales	Brucellaceae	Ochrobactrum
neg.ctrl_PCR_4_10532682	k__Bacteria;p__Proteobacteria;c__Alphaproteobacteria;o__Rhizobiales;f__Brucellaceae;g__Ochrobactrum;	Bacteria	Proteobacteria	Alphaproteobacteria	Rhizobiales	Brucellaceae	Ochrobactrum
neg.ctrl_PCR_4_10873244	k__Bacteria;p__Proteobacteria;c__Alphaproteobacteria;o__Rhizobiales;f__Brucellaceae;g__Ochrobactrum;	Bacteria	Proteobacteria	Alphaproteobacteria	Rhizobiales	Brucellaceae	Ochrobactrum
neg.ctrl_PCR_4_10962495	k__Bacteria;p__Proteobacteria;c__Alphaproteobacteria;o__Rhizobiales;f__Brucellaceae;g__Ochrobactrum;	Bacteria	Proteobacteria	Alphaproteobacteria	Rhizobiales	Brucellaceae	Ochrobactrum
neg.ctrl_PCR_4_11115635	k__Bacteria;p__Proteobacteria;c__Alphaproteobacteria;o__Rhizobiales;f__Brucellaceae;g__Ochrobactrum;	Bacteria	Proteobacteria	Alphaproteobacteria	Rhizobiales	Brucellaceae	Ochrobactrum
neg.ctrl_PCR_4_11229929	k__Bacteria;p__Proteobacteria;c__Alphaproteobacteria;o__Rhizobiales;f__Brucellaceae;g__Ochrobactrum;	Bacteria	Proteobacteria	Alphaproteobacteria	Rhizobiales	Brucellaceae	Ochrobactrum
neg.ctrl_PCR_4_11390323	k__Bacteria;p__Proteobacteria;c__Alphaproteobacteria;o__Rhizobiales;f__Brucellaceae;g__Ochrobactrum;	Bacteria	Proteobacteria	Alphaproteobacteria	Rhizobiales	Brucellaceae	Ochrobactrum
neg.ctrl_PCR_4_11615231	k__Bacteria;p__Proteobacteria;c__Alphaproteobacteria;o__Rhizobiales;f__Brucellaceae;g__Ochrobactrum;	Bacteria	Proteobacteria	Alphaproteobacteria	Rhizobiales	Brucellaceae	Ochrobactrum
neg.ctrl_PCR_4_11716925	k__Bacteria;p__Proteobacteria;c__Alphaproteobacteria;o__Rhizobiales;f__Brucellaceae;g__Ochrobactrum;	Bacteria	Proteobacteria	Alphaproteobacteria	Rhizobiales	Brucellaceae	Ochrobactrum
neg.ctrl_PCR_4_12108612	k__Bacteria;p__Proteobacteria;c__Alphaproteobacteria;o__Rhizobiales;f__Brucellaceae;g__Ochrobactrum;	Bacteria	Proteobacteria	Alphaproteobacteria	Rhizobiales	Brucellaceae	Ochrobactrum
neg.ctrl_PCR_4_12770934	k__Bacteria;p__Proteobacteria;c__Alphaproteobacteria;o__Rhizobiales;f__Brucellaceae;g__Ochrobactrum;	Bacteria	Proteobacteria	Alphaproteobacteria	Rhizobiales	Brucellaceae	Ochrobactrum
neg.ctrl_PCR_4_12854349	k__Bacteria;p__Proteobacteria;c__Alphaproteobacteria;o__Rhizobiales;f__Brucellaceae;g__Ochrobactrum;	Bacteria	Proteobacteria	Alphaproteobacteria	Rhizobiales	Brucellaceae	Ochrobactrum
neg.ctrl_PCR_4_7654441	k__Bacteria;p__Proteobacteria;c__Alphaproteobacteria;o__Rhizobiales;f__Brucellaceae;g__Ochrobactrum;	Bacteria	Proteobacteria	Alphaproteobacteria	Rhizobiales	Brucellaceae	Ochrobactrum
neg.ctrl_PCR_4_8010175	k__Bacteria;p__Proteobacteria;c__Alphaproteobacteria;o__Rhizobiales;f__Brucellaceae;g__Ochrobactrum;	Bacteria	Proteobacteria	Alphaproteobacteria	Rhizobiales	Brucellaceae	Ochrobactrum
neg.ctrl_PCR_4_8510105	k__Bacteria;p__Proteobacteria;c__Alphaproteobacteria;o__Rhizobiales;f__Brucellaceae;g__Ochrobactrum;	Bacteria	Proteobacteria	Alphaproteobacteria	Rhizobiales	Brucellaceae	Ochrobactrum
neg.ctrl_PCR_4_8782556	k__Bacteria;p__Proteobacteria;c__Alphaproteobacteria;o__Rhizobiales;f__Brucellaceae;g__Ochrobactrum;	Bacteria	Proteobacteria	Alphaproteobacteria	Rhizobiales	Brucellaceae	Ochrobactrum
neg.ctrl_PCR_4_8859141	k__Bacteria;p__Proteobacteria;c__Alphaproteobacteria;o__Rhizobiales;f__Brucellaceae;g__Ochrobactrum;	Bacteria	Proteobacteria	Alphaproteobacteria	Rhizobiales	Brucellaceae	Ochrobactrum
neg.ctrl_PCR_4_8894239	k__Bacteria;p__Proteobacteria;c__Alphaproteobacteria;o__Rhizobiales;f__Brucellaceae;g__Ochrobactrum;	Bacteria	Proteobacteria	Alphaproteobacteria	Rhizobiales	Brucellaceae	Ochrobactrum
neg.ctrl_PCR_4_9156110	k__Bacteria;p__Proteobacteria;c__Alphaproteobacteria;o__Rhizobiales;f__Brucellaceae;g__Ochrobactrum;	Bacteria	Proteobacteria	Alphaproteobacteria	Rhizobiales	Brucellaceae	Ochrobactrum
neg.ctrl5_5275947	k__Bacteria;p__Proteobacteria;c__Alphaproteobacteria;o__Rhizobiales;f__Brucellaceae;g__Ochrobactrum;	Bacteria	Proteobacteria	Alphaproteobacteria	Rhizobiales	Brucellaceae	Ochrobactrum
neg.ctrl1_4327040	k__Bacteria;p__Proteobacteria;c__Alphaproteobacteria;o__Rhizobiales;f__Hyphomicrobiaceae;g__Hyphomicrobium;	Bacteria	Proteobacteria	Alphaproteobacteria	Rhizobiales	Hyphomicrobiaceae	Hyphomicrobium
empty3_2360785	k__Bacteria;p__Proteobacteria;c__Alphaproteobacteria;o__Rhizobiales;f__Methylobacteriaceae;g__Methylobacterium;	Bacteria	Proteobacteria	Alphaproteobacteria	Rhizobiales	Methylobacteriaceae	Methylobacterium
neg.ctrl_PCR_3_5658650	k__Bacteria;p__Proteobacteria;c__Alphaproteobacteria;o__Rhizobiales;f__Methylobacteriaceae;g__Methylobacterium;	Bacteria	Proteobacteria	Alphaproteobacteria	Rhizobiales	Methylobacteriaceae	Methylobacterium
neg.ctrl_PCR_3_6668777	k__Bacteria;p__Proteobacteria;c__Alphaproteobacteria;o__Rhizobiales;f__Methylobacteriaceae;g__Methylobacterium;	Bacteria	Proteobacteria	Alphaproteobacteria	Rhizobiales	Methylobacteriaceae	Methylobacterium
neg.ctrl_PCR_4_10083319	k__Bacteria;p__Proteobacteria;c__Alphaproteobacteria;o__Rhizobiales;f__Methylobacteriaceae;g__Methylobacterium;	Bacteria	Proteobacteria	Alphaproteobacteria	Rhizobiales	Methylobacteriaceae	Methylobacterium
neg.ctrl_PCR_4_10249261	k__Bacteria;p__Proteobacteria;c__Alphaproteobacteria;o__Rhizobiales;f__Methylobacteriaceae;g__Methylobacterium;	Bacteria	Proteobacteria	Alphaproteobacteria	Rhizobiales	Methylobacteriaceae	Methylobacterium
neg.ctrl_PCR_4_10704179	k__Bacteria;p__Proteobacteria;c__Alphaproteobacteria;o__Rhizobiales;f__Methylobacteriaceae;g__Methylobacterium;	Bacteria	Proteobacteria	Alphaproteobacteria	Rhizobiales	Methylobacteriaceae	Methylobacterium
neg.ctrl_PCR_4_10771797	k__Bacteria;p__Proteobacteria;c__Alphaproteobacteria;o__Rhizobiales;f__Methylobacteriaceae;g__Methylobacterium;	Bacteria	Proteobacteria	Alphaproteobacteria	Rhizobiales	Methylobacteriaceae	Methylobacterium
neg.ctrl_PCR_4_10852665	k__Bacteria;p__Proteobacteria;c__Alphaproteobacteria;o__Rhizobiales;f__Methylobacteriaceae;g__Methylobacterium;	Bacteria	Proteobacteria	Alphaproteobacteria	Rhizobiales	Methylobacteriaceae	Methylobacterium
neg.ctrl_PCR_4_10863912	k__Bacteria;p__Proteobacteria;c__Alphaproteobacteria;o__Rhizobiales;f__Methylobacteriaceae;g__Methylobacterium;	Bacteria	Proteobacteria	Alphaproteobacteria	Rhizobiales	Methylobacteriaceae	Methylobacterium
neg.ctrl_PCR_4_10995076	k__Bacteria;p__Proteobacteria;c__Alphaproteobacteria;o__Rhizobiales;f__Methylobacteriaceae;g__Methylobacterium;	Bacteria	Proteobacteria	Alphaproteobacteria	Rhizobiales	Methylobacteriaceae	Methylobacterium
neg.ctrl_PCR_4_11044050	k__Bacteria;p__Proteobacteria;c__Alphaproteobacteria;o__Rhizobiales;f__Methylobacteriaceae;g__Methylobacterium;	Bacteria	Proteobacteria	Alphaproteobacteria	Rhizobiales	Methylobacteriaceae	Methylobacterium
neg.ctrl_PCR_4_11105858	k__Bacteria;p__Proteobacteria;c__Alphaproteobacteria;o__Rhizobiales;f__Methylobacteriaceae;g__Methylobacterium;	Bacteria	Proteobacteria	Alphaproteobacteria	Rhizobiales	Methylobacteriaceae	Methylobacterium
neg.ctrl_PCR_4_11228048	k__Bacteria;p__Proteobacteria;c__Alphaproteobacteria;o__Rhizobiales;f__Methylobacteriaceae;g__Methylobacterium;	Bacteria	Proteobacteria	Alphaproteobacteria	Rhizobiales	Methylobacteriaceae	Methylobacterium
neg.ctrl_PCR_4_11240661	k__Bacteria;p__Proteobacteria;c__Alphaproteobacteria;o__Rhizobiales;f__Methylobacteriaceae;g__Methylobacterium;	Bacteria	Proteobacteria	Alphaproteobacteria	Rhizobiales	Methylobacteriaceae	Methylobacterium
neg.ctrl_PCR_4_11485229	k__Bacteria;p__Proteobacteria;c__Alphaproteobacteria;o__Rhizobiales;f__Methylobacteriaceae;g__Methylobacterium;	Bacteria	Proteobacteria	Alphaproteobacteria	Rhizobiales	Methylobacteriaceae	Methylobacterium
neg.ctrl_PCR_4_11645097	k__Bacteria;p__Proteobacteria;c__Alphaproteobacteria;o__Rhizobiales;f__Methylobacteriaceae;g__Methylobacterium;	Bacteria	Proteobacteria	Alphaproteobacteria	Rhizobiales	Methylobacteriaceae	Methylobacterium
neg.ctrl_PCR_4_11675386	k__Bacteria;p__Proteobacteria;c__Alphaproteobacteria;o__Rhizobiales;f__Methylobacteriaceae;g__Methylobacterium;	Bacteria	Proteobacteria	Alphaproteobacteria	Rhizobiales	Methylobacteriaceae	Methylobacterium
neg.ctrl_PCR_4_11863613	k__Bacteria;p__Proteobacteria;c__Alphaproteobacteria;o__Rhizobiales;f__Methylobacteriaceae;g__Methylobacterium;	Bacteria	Proteobacteria	Alphaproteobacteria	Rhizobiales	Methylobacteriaceae	Methylobacterium
neg.ctrl_PCR_4_11876764	k__Bacteria;p__Proteobacteria;c__Alphaproteobacteria;o__Rhizobiales;f__Methylobacteriaceae;g__Methylobacterium;	Bacteria	Proteobacteria	Alphaproteobacteria	Rhizobiales	Methylobacteriaceae	Methylobacterium
neg.ctrl_PCR_4_12082591	k__Bacteria;p__Proteobacteria;c__Alphaproteobacteria;o__Rhizobiales;f__Methylobacteriaceae;g__Methylobacterium;	Bacteria	Proteobacteria	Alphaproteobacteria	Rhizobiales	Methylobacteriaceae	Methylobacterium
neg.ctrl_PCR_4_12259666	k__Bacteria;p__Proteobacteria;c__Alphaproteobacteria;o__Rhizobiales;f__Methylobacteriaceae;g__Methylobacterium;	Bacteria	Proteobacteria	Alphaproteobacteria	Rhizobiales	Methylobacteriaceae	Methylobacterium
neg.ctrl_PCR_4_12376184	k__Bacteria;p__Proteobacteria;c__Alphaproteobacteria;o__Rhizobiales;f__Methylobacteriaceae;g__Methylobacterium;	Bacteria	Proteobacteria	Alphaproteobacteria	Rhizobiales	Methylobacteriaceae	Methylobacterium
neg.ctrl_PCR_4_12474706	k__Bacteria;p__Proteobacteria;c__Alphaproteobacteria;o__Rhizobiales;f__Methylobacteriaceae;g__Methylobacterium;	Bacteria	Proteobacteria	Alphaproteobacteria	Rhizobiales	Methylobacteriaceae	Methylobacterium
neg.ctrl_PCR_4_12692931	k__Bacteria;p__Proteobacteria;c__Alphaproteobacteria;o__Rhizobiales;f__Methylobacteriaceae;g__Methylobacterium;	Bacteria	Proteobacteria	Alphaproteobacteria	Rhizobiales	Methylobacteriaceae	Methylobacterium
neg.ctrl_PCR_4_12715199	k__Bacteria;p__Proteobacteria;c__Alphaproteobacteria;o__Rhizobiales;f__Methylobacteriaceae;g__Methylobacterium;	Bacteria	Proteobacteria	Alphaproteobacteria	Rhizobiales	Methylobacteriaceae	Methylobacterium
neg.ctrl_PCR_4_12748866	k__Bacteria;p__Proteobacteria;c__Alphaproteobacteria;o__Rhizobiales;f__Methylobacteriaceae;g__Methylobacterium;	Bacteria	Proteobacteria	Alphaproteobacteria	Rhizobiales	Methylobacteriaceae	Methylobacterium
neg.ctrl_PCR_4_12784328	k__Bacteria;p__Proteobacteria;c__Alphaproteobacteria;o__Rhizobiales;f__Methylobacteriaceae;g__Methylobacterium;	Bacteria	Proteobacteria	Alphaproteobacteria	Rhizobiales	Methylobacteriaceae	Methylobacterium
neg.ctrl_PCR_4_7682144	k__Bacteria;p__Proteobacteria;c__Alphaproteobacteria;o__Rhizobiales;f__Methylobacteriaceae;g__Methylobacterium;	Bacteria	Proteobacteria	Alphaproteobacteria	Rhizobiales	Methylobacteriaceae	Methylobacterium
neg.ctrl_PCR_4_7696692	k__Bacteria;p__Proteobacteria;c__Alphaproteobacteria;o__Rhizobiales;f__Methylobacteriaceae;g__Methylobacterium;	Bacteria	Proteobacteria	Alphaproteobacteria	Rhizobiales	Methylobacteriaceae	Methylobacterium
neg.ctrl_PCR_4_7849647	k__Bacteria;p__Proteobacteria;c__Alphaproteobacteria;o__Rhizobiales;f__Methylobacteriaceae;g__Methylobacterium;	Bacteria	Proteobacteria	Alphaproteobacteria	Rhizobiales	Methylobacteriaceae	Methylobacterium
neg.ctrl_PCR_4_8198898	k__Bacteria;p__Proteobacteria;c__Alphaproteobacteria;o__Rhizobiales;f__Methylobacteriaceae;g__Methylobacterium;	Bacteria	Proteobacteria	Alphaproteobacteria	Rhizobiales	Methylobacteriaceae	Methylobacterium
neg.ctrl_PCR_4_8218739	k__Bacteria;p__Proteobacteria;c__Alphaproteobacteria;o__Rhizobiales;f__Methylobacteriaceae;g__Methylobacterium;	Bacteria	Proteobacteria	Alphaproteobacteria	Rhizobiales	Methylobacteriaceae	Methylobacterium
neg.ctrl_PCR_4_8279607	k__Bacteria;p__Proteobacteria;c__Alphaproteobacteria;o__Rhizobiales;f__Methylobacteriaceae;g__Methylobacterium;	Bacteria	Proteobacteria	Alphaproteobacteria	Rhizobiales	Methylobacteriaceae	Methylobacterium
neg.ctrl_PCR_4_8346629	k__Bacteria;p__Proteobacteria;c__Alphaproteobacteria;o__Rhizobiales;f__Methylobacteriaceae;g__Methylobacterium;	Bacteria	Proteobacteria	Alphaproteobacteria	Rhizobiales	Methylobacteriaceae	Methylobacterium
neg.ctrl_PCR_4_8736625	k__Bacteria;p__Proteobacteria;c__Alphaproteobacteria;o__Rhizobiales;f__Methylobacteriaceae;g__Methylobacterium;	Bacteria	Proteobacteria	Alphaproteobacteria	Rhizobiales	Methylobacteriaceae	Methylobacterium
neg.ctrl_PCR_4_9165615	k__Bacteria;p__Proteobacteria;c__Alphaproteobacteria;o__Rhizobiales;f__Methylobacteriaceae;g__Methylobacterium;	Bacteria	Proteobacteria	Alphaproteobacteria	Rhizobiales	Methylobacteriaceae	Methylobacterium
neg.ctrl_PCR_4_9172557	k__Bacteria;p__Proteobacteria;c__Alphaproteobacteria;o__Rhizobiales;f__Methylobacteriaceae;g__Methylobacterium;	Bacteria	Proteobacteria	Alphaproteobacteria	Rhizobiales	Methylobacteriaceae	Methylobacterium
neg.ctrl_PCR_4_9295894	k__Bacteria;p__Proteobacteria;c__Alphaproteobacteria;o__Rhizobiales;f__Methylobacteriaceae;g__Methylobacterium;	Bacteria	Proteobacteria	Alphaproteobacteria	Rhizobiales	Methylobacteriaceae	Methylobacterium
neg.ctrl_PCR_4_9312338	k__Bacteria;p__Proteobacteria;c__Alphaproteobacteria;o__Rhizobiales;f__Methylobacteriaceae;g__Methylobacterium;	Bacteria	Proteobacteria	Alphaproteobacteria	Rhizobiales	Methylobacteriaceae	Methylobacterium
neg.ctrl_PCR_4_9504411	k__Bacteria;p__Proteobacteria;c__Alphaproteobacteria;o__Rhizobiales;f__Methylobacteriaceae;g__Methylobacterium;	Bacteria	Proteobacteria	Alphaproteobacteria	Rhizobiales	Methylobacteriaceae	Methylobacterium
neg.ctrl_PCR_4_9586751	k__Bacteria;p__Proteobacteria;c__Alphaproteobacteria;o__Rhizobiales;f__Methylobacteriaceae;g__Methylobacterium;	Bacteria	Proteobacteria	Alphaproteobacteria	Rhizobiales	Methylobacteriaceae	Methylobacterium
neg.ctrl_PCR_4_9666906	k__Bacteria;p__Proteobacteria;c__Alphaproteobacteria;o__Rhizobiales;f__Methylobacteriaceae;g__Methylobacterium;	Bacteria	Proteobacteria	Alphaproteobacteria	Rhizobiales	Methylobacteriaceae	Methylobacterium
neg.ctrl_PCR_4_9792627	k__Bacteria;p__Proteobacteria;c__Alphaproteobacteria;o__Rhizobiales;f__Methylobacteriaceae;g__Methylobacterium;	Bacteria	Proteobacteria	Alphaproteobacteria	Rhizobiales	Methylobacteriaceae	Methylobacterium
neg.ctrl_PCR_4_9945893	k__Bacteria;p__Proteobacteria;c__Alphaproteobacteria;o__Rhizobiales;f__Methylobacteriaceae;g__Methylobacterium;	Bacteria	Proteobacteria	Alphaproteobacteria	Rhizobiales	Methylobacteriaceae	Methylobacterium
neg.ctrl_PCR_4_9997283	k__Bacteria;p__Proteobacteria;c__Alphaproteobacteria;o__Rhizobiales;f__Methylobacteriaceae;g__Methylobacterium;	Bacteria	Proteobacteria	Alphaproteobacteria	Rhizobiales	Methylobacteriaceae	Methylobacterium
neg.ctrl4_1951173	k__Bacteria;p__Proteobacteria;c__Alphaproteobacteria;o__Rhizobiales;f__Methylobacteriaceae;g__Methylobacterium;	Bacteria	Proteobacteria	Alphaproteobacteria	Rhizobiales	Methylobacteriaceae	Methylobacterium
neg.ctrl6_2378506	k__Bacteria;p__Proteobacteria;c__Alphaproteobacteria;o__Rhizobiales;f__Methylobacteriaceae;g__Methylobacterium;	Bacteria	Proteobacteria	Alphaproteobacteria	Rhizobiales	Methylobacteriaceae	Methylobacterium
neg.ctrl6_2942770	k__Bacteria;p__Proteobacteria;c__Alphaproteobacteria;o__Rhizobiales;f__Methylobacteriaceae;g__Methylobacterium;	Bacteria	Proteobacteria	Alphaproteobacteria	Rhizobiales	Methylobacteriaceae	Methylobacterium
neg.ctrl7_2205268	k__Bacteria;p__Proteobacteria;c__Alphaproteobacteria;o__Rhizobiales;f__Methylobacteriaceae;g__Methylobacterium;	Bacteria	Proteobacteria	Alphaproteobacteria	Rhizobiales	Methylobacteriaceae	Methylobacterium
neg.ctrl7_2516490	k__Bacteria;p__Proteobacteria;c__Alphaproteobacteria;o__Rhizobiales;f__Methylobacteriaceae;g__Methylobacterium;	Bacteria	Proteobacteria	Alphaproteobacteria	Rhizobiales	Methylobacteriaceae	Methylobacterium
neg.ctrl7_3899486	k__Bacteria;p__Proteobacteria;c__Alphaproteobacteria;o__Rhizobiales;f__Methylobacteriaceae;g__Methylobacterium;	Bacteria	Proteobacteria	Alphaproteobacteria	Rhizobiales	Methylobacteriaceae	Methylobacterium
neg.ctrl7_4285641	k__Bacteria;p__Proteobacteria;c__Alphaproteobacteria;o__Rhizobiales;f__Methylobacteriaceae;g__Methylobacterium;	Bacteria	Proteobacteria	Alphaproteobacteria	Rhizobiales	Methylobacteriaceae	Methylobacterium
neg.ctrl4_1839248	k__Bacteria;p__Proteobacteria;c__Alphaproteobacteria;o__Rhizobiales;f__Methylobacteriaceae;	Bacteria	Proteobacteria	Alphaproteobacteria	Rhizobiales	Methylobacteriaceae
empty2_3496251	k__Bacteria;p__Proteobacteria;c__Alphaproteobacteria;o__Rhizobiales;f__Rhizobiaceae;g__Agrobacterium;	Bacteria	Proteobacteria	Alphaproteobacteria	Rhizobiales	Rhizobiaceae	Agrobacterium
empty3_1395543	k__Bacteria;p__Proteobacteria;c__Alphaproteobacteria;o__Rhizobiales;f__Rhizobiaceae;g__Agrobacterium;	Bacteria	Proteobacteria	Alphaproteobacteria	Rhizobiales	Rhizobiaceae	Agrobacterium
empty3_1622368	k__Bacteria;p__Proteobacteria;c__Alphaproteobacteria;o__Rhizobiales;f__Rhizobiaceae;g__Agrobacterium;	Bacteria	Proteobacteria	Alphaproteobacteria	Rhizobiales	Rhizobiaceae	Agrobacterium
empty3_1631422	k__Bacteria;p__Proteobacteria;c__Alphaproteobacteria;o__Rhizobiales;f__Rhizobiaceae;g__Agrobacterium;	Bacteria	Proteobacteria	Alphaproteobacteria	Rhizobiales	Rhizobiaceae	Agrobacterium
empty3_1638840	k__Bacteria;p__Proteobacteria;c__Alphaproteobacteria;o__Rhizobiales;f__Rhizobiaceae;g__Agrobacterium;	Bacteria	Proteobacteria	Alphaproteobacteria	Rhizobiales	Rhizobiaceae	Agrobacterium
empty3_1694256	k__Bacteria;p__Proteobacteria;c__Alphaproteobacteria;o__Rhizobiales;f__Rhizobiaceae;g__Agrobacterium;	Bacteria	Proteobacteria	Alphaproteobacteria	Rhizobiales	Rhizobiaceae	Agrobacterium
empty3_1717082	k__Bacteria;p__Proteobacteria;c__Alphaproteobacteria;o__Rhizobiales;f__Rhizobiaceae;g__Agrobacterium;	Bacteria	Proteobacteria	Alphaproteobacteria	Rhizobiales	Rhizobiaceae	Agrobacterium
empty3_1779374	k__Bacteria;p__Proteobacteria;c__Alphaproteobacteria;o__Rhizobiales;f__Rhizobiaceae;g__Agrobacterium;	Bacteria	Proteobacteria	Alphaproteobacteria	Rhizobiales	Rhizobiaceae	Agrobacterium
empty3_1876685	k__Bacteria;p__Proteobacteria;c__Alphaproteobacteria;o__Rhizobiales;f__Rhizobiaceae;g__Agrobacterium;	Bacteria	Proteobacteria	Alphaproteobacteria	Rhizobiales	Rhizobiaceae	Agrobacterium
empty3_1896553	k__Bacteria;p__Proteobacteria;c__Alphaproteobacteria;o__Rhizobiales;f__Rhizobiaceae;g__Agrobacterium;	Bacteria	Proteobacteria	Alphaproteobacteria	Rhizobiales	Rhizobiaceae	Agrobacterium
empty3_1971945	k__Bacteria;p__Proteobacteria;c__Alphaproteobacteria;o__Rhizobiales;f__Rhizobiaceae;g__Agrobacterium;	Bacteria	Proteobacteria	Alphaproteobacteria	Rhizobiales	Rhizobiaceae	Agrobacterium
empty3_2189553	k__Bacteria;p__Proteobacteria;c__Alphaproteobacteria;o__Rhizobiales;f__Rhizobiaceae;g__Agrobacterium;	Bacteria	Proteobacteria	Alphaproteobacteria	Rhizobiales	Rhizobiaceae	Agrobacterium
empty3_1323535	k__Bacteria;p__Proteobacteria;c__Alphaproteobacteria;o__Rhizobiales;f__Rhizobiaceae;	Bacteria	Proteobacteria	Alphaproteobacteria	Rhizobiales	Rhizobiaceae
empty3_1402248	k__Bacteria;p__Proteobacteria;c__Alphaproteobacteria;o__Rhizobiales;f__Rhizobiaceae;	Bacteria	Proteobacteria	Alphaproteobacteria	Rhizobiales	Rhizobiaceae
empty3_1879134	k__Bacteria;p__Proteobacteria;c__Alphaproteobacteria;o__Rhizobiales;f__Rhizobiaceae;	Bacteria	Proteobacteria	Alphaproteobacteria	Rhizobiales	Rhizobiaceae
empty3_2058866	k__Bacteria;p__Proteobacteria;c__Alphaproteobacteria;o__Rhizobiales;f__Rhizobiaceae;	Bacteria	Proteobacteria	Alphaproteobacteria	Rhizobiales	Rhizobiaceae
empty3_2114750	k__Bacteria;p__Proteobacteria;c__Alphaproteobacteria;o__Rhizobiales;f__Rhizobiaceae;	Bacteria	Proteobacteria	Alphaproteobacteria	Rhizobiales	Rhizobiaceae
empty3_2169263	k__Bacteria;p__Proteobacteria;c__Alphaproteobacteria;o__Rhizobiales;f__Rhizobiaceae;	Bacteria	Proteobacteria	Alphaproteobacteria	Rhizobiales	Rhizobiaceae
empty3_2251809	k__Bacteria;p__Proteobacteria;c__Alphaproteobacteria;o__Rhizobiales;f__Rhizobiaceae;	Bacteria	Proteobacteria	Alphaproteobacteria	Rhizobiales	Rhizobiaceae
empty3_1271546	k__Bacteria;p__Proteobacteria;c__Alphaproteobacteria;o__Rhodobacterales;f__Rhodobacteraceae;g__Paracoccus;	Bacteria	Proteobacteria	Alphaproteobacteria	Rhodobacterales	Rhodobacteraceae	Paracoccus
empty3_1328704	k__Bacteria;p__Proteobacteria;c__Alphaproteobacteria;o__Rhodobacterales;f__Rhodobacteraceae;g__Paracoccus;	Bacteria	Proteobacteria	Alphaproteobacteria	Rhodobacterales	Rhodobacteraceae	Paracoccus
empty3_1375342	k__Bacteria;p__Proteobacteria;c__Alphaproteobacteria;o__Rhodobacterales;f__Rhodobacteraceae;g__Paracoccus;	Bacteria	Proteobacteria	Alphaproteobacteria	Rhodobacterales	Rhodobacteraceae	Paracoccus
empty3_1822341	k__Bacteria;p__Proteobacteria;c__Alphaproteobacteria;o__Rhodobacterales;f__Rhodobacteraceae;g__Paracoccus;	Bacteria	Proteobacteria	Alphaproteobacteria	Rhodobacterales	Rhodobacteraceae	Paracoccus
empty3_2323188	k__Bacteria;p__Proteobacteria;c__Alphaproteobacteria;o__Rhodobacterales;f__Rhodobacteraceae;g__Paracoccus;	Bacteria	Proteobacteria	Alphaproteobacteria	Rhodobacterales	Rhodobacteraceae	Paracoccus
empty1_2792652	k__Bacteria;p__Proteobacteria;c__Alphaproteobacteria;o__Rhodobacterales;f__Rhodobacteraceae;	Bacteria	Proteobacteria	Alphaproteobacteria	Rhodobacterales	Rhodobacteraceae
empty3_1964768	k__Bacteria;p__Proteobacteria;c__Alphaproteobacteria;o__Rhodobacterales;f__Rhodobacteraceae;	Bacteria	Proteobacteria	Alphaproteobacteria	Rhodobacterales	Rhodobacteraceae
empty3_2084727	k__Bacteria;p__Proteobacteria;c__Alphaproteobacteria;o__Rhodobacterales;f__Rhodobacteraceae;	Bacteria	Proteobacteria	Alphaproteobacteria	Rhodobacterales	Rhodobacteraceae
empty3_1452200	k__Bacteria;p__Proteobacteria;c__Alphaproteobacteria;o__Sphingomonadales;f__Sphingomonadaceae;g__Kaistobacter;	Bacteria	Proteobacteria	Alphaproteobacteria	Sphingomonadales	Sphingomonadaceae	Kaistobacter
empty3_2348742	k__Bacteria;p__Proteobacteria;c__Alphaproteobacteria;o__Sphingomonadales;f__Sphingomonadaceae;g__Kaistobacter;	Bacteria	Proteobacteria	Alphaproteobacteria	Sphingomonadales	Sphingomonadaceae	Kaistobacter
empty1_2582440	k__Bacteria;p__Proteobacteria;c__Alphaproteobacteria;o__Sphingomonadales;f__Sphingomonadaceae;g__Sphingomonas;	Bacteria	Proteobacteria	Alphaproteobacteria	Sphingomonadales	Sphingomonadaceae	Sphingomonas
empty3_1745856	k__Bacteria;p__Proteobacteria;c__Alphaproteobacteria;o__Sphingomonadales;f__Sphingomonadaceae;g__Sphingomonas;	Bacteria	Proteobacteria	Alphaproteobacteria	Sphingomonadales	Sphingomonadaceae	Sphingomonas
neg.ctrl_PCR_2_2767157	k__Bacteria;p__Proteobacteria;c__Alphaproteobacteria;o__Sphingomonadales;f__Sphingomonadaceae;g__Sphingomonas;	Bacteria	Proteobacteria	Alphaproteobacteria	Sphingomonadales	Sphingomonadaceae	Sphingomonas
neg.ctrl_PCR_2_3661338	k__Bacteria;p__Proteobacteria;c__Alphaproteobacteria;o__Sphingomonadales;f__Sphingomonadaceae;g__Sphingomonas;	Bacteria	Proteobacteria	Alphaproteobacteria	Sphingomonadales	Sphingomonadaceae	Sphingomonas
neg.ctrl_PCR_2_3781045	k__Bacteria;p__Proteobacteria;c__Alphaproteobacteria;o__Sphingomonadales;f__Sphingomonadaceae;g__Sphingomonas;	Bacteria	Proteobacteria	Alphaproteobacteria	Sphingomonadales	Sphingomonadaceae	Sphingomonas
neg.ctrl_PCR_2_3873799	k__Bacteria;p__Proteobacteria;c__Alphaproteobacteria;o__Sphingomonadales;f__Sphingomonadaceae;g__Sphingomonas;	Bacteria	Proteobacteria	Alphaproteobacteria	Sphingomonadales	Sphingomonadaceae	Sphingomonas
neg.ctrl_PCR_2_4193619	k__Bacteria;p__Proteobacteria;c__Alphaproteobacteria;o__Sphingomonadales;f__Sphingomonadaceae;g__Sphingomonas;	Bacteria	Proteobacteria	Alphaproteobacteria	Sphingomonadales	Sphingomonadaceae	Sphingomonas
neg.ctrl_PCR_2_4331467	k__Bacteria;p__Proteobacteria;c__Alphaproteobacteria;o__Sphingomonadales;f__Sphingomonadaceae;g__Sphingomonas;	Bacteria	Proteobacteria	Alphaproteobacteria	Sphingomonadales	Sphingomonadaceae	Sphingomonas
neg.ctrl_PCR_3_5633674	k__Bacteria;p__Proteobacteria;c__Alphaproteobacteria;o__Sphingomonadales;f__Sphingomonadaceae;g__Sphingomonas;	Bacteria	Proteobacteria	Alphaproteobacteria	Sphingomonadales	Sphingomonadaceae	Sphingomonas
neg.ctrl5_5575952	k__Bacteria;p__Proteobacteria;c__Alphaproteobacteria;o__Sphingomonadales;f__Sphingomonadaceae;g__Sphingomonas;	Bacteria	Proteobacteria	Alphaproteobacteria	Sphingomonadales	Sphingomonadaceae	Sphingomonas
neg.ctrl6_2920291	k__Bacteria;p__Proteobacteria;c__Alphaproteobacteria;o__Sphingomonadales;f__Sphingomonadaceae;g__Sphingomonas;	Bacteria	Proteobacteria	Alphaproteobacteria	Sphingomonadales	Sphingomonadaceae	Sphingomonas
neg.ctrl_PCR_2_2780229	k__Bacteria;p__Proteobacteria;c__Alphaproteobacteria;o__Sphingomonadales;f__Sphingomonadaceae;	Bacteria	Proteobacteria	Alphaproteobacteria	Sphingomonadales	Sphingomonadaceae
neg.ctrl6_2790150	k__Bacteria;p__Proteobacteria;c__Betaproteobacteria;o__Burkholderiales;f__Alcaligenaceae;g__Achromobacter;	Bacteria	Proteobacteria	Betaproteobacteria	Burkholderiales	Alcaligenaceae	Achromobacter
neg.ctrl6_2961415	k__Bacteria;p__Proteobacteria;c__Betaproteobacteria;o__Burkholderiales;f__Alcaligenaceae;g__Achromobacter;	Bacteria	Proteobacteria	Betaproteobacteria	Burkholderiales	Alcaligenaceae	Achromobacter
neg.ctrl7_2556917	k__Bacteria;p__Proteobacteria;c__Betaproteobacteria;o__Burkholderiales;f__Alcaligenaceae;g__Achromobacter;	Bacteria	Proteobacteria	Betaproteobacteria	Burkholderiales	Alcaligenaceae	Achromobacter
neg.ctrl6_2631305	k__Bacteria;p__Proteobacteria;c__Betaproteobacteria;o__Burkholderiales;f__Alcaligenaceae;g__Sutterella;	Bacteria	Proteobacteria	Betaproteobacteria	Burkholderiales	Alcaligenaceae	Sutterella
neg.ctrl_PCR_3_5572635	k__Bacteria;p__Proteobacteria;c__Betaproteobacteria;o__Burkholderiales;f__Alcaligenaceae;	Bacteria	Proteobacteria	Betaproteobacteria	Burkholderiales	Alcaligenaceae
neg.ctrl_PCR_3_5681033	k__Bacteria;p__Proteobacteria;c__Betaproteobacteria;o__Burkholderiales;f__Alcaligenaceae;	Bacteria	Proteobacteria	Betaproteobacteria	Burkholderiales	Alcaligenaceae
neg.ctrl_PCR_3_6204373	k__Bacteria;p__Proteobacteria;c__Betaproteobacteria;o__Burkholderiales;f__Alcaligenaceae;	Bacteria	Proteobacteria	Betaproteobacteria	Burkholderiales	Alcaligenaceae
neg.ctrl_PCR_3_6726123	k__Bacteria;p__Proteobacteria;c__Betaproteobacteria;o__Burkholderiales;f__Alcaligenaceae;	Bacteria	Proteobacteria	Betaproteobacteria	Burkholderiales	Alcaligenaceae
neg.ctrl_PCR_3_7082928	k__Bacteria;p__Proteobacteria;c__Betaproteobacteria;o__Burkholderiales;f__Alcaligenaceae;	Bacteria	Proteobacteria	Betaproteobacteria	Burkholderiales	Alcaligenaceae
neg.ctrl_PCR_3_7244861	k__Bacteria;p__Proteobacteria;c__Betaproteobacteria;o__Burkholderiales;f__Alcaligenaceae;	Bacteria	Proteobacteria	Betaproteobacteria	Burkholderiales	Alcaligenaceae
neg.ctrl_PCR_3_7613779	k__Bacteria;p__Proteobacteria;c__Betaproteobacteria;o__Burkholderiales;f__Alcaligenaceae;	Bacteria	Proteobacteria	Betaproteobacteria	Burkholderiales	Alcaligenaceae
neg.ctrl_PCR_3_7807125	k__Bacteria;p__Proteobacteria;c__Betaproteobacteria;o__Burkholderiales;f__Alcaligenaceae;	Bacteria	Proteobacteria	Betaproteobacteria	Burkholderiales	Alcaligenaceae
neg.ctrl_PCR_4_11908843	k__Bacteria;p__Proteobacteria;c__Betaproteobacteria;o__Burkholderiales;f__Comamonadaceae;g__Curvibacter;	Bacteria	Proteobacteria	Betaproteobacteria	Burkholderiales	Comamonadaceae	Curvibacter
neg.ctrl_PCR_2_2781926	k__Bacteria;p__Proteobacteria;c__Betaproteobacteria;o__Burkholderiales;f__Comamonadaceae;g__Delftia;	Bacteria	Proteobacteria	Betaproteobacteria	Burkholderiales	Comamonadaceae	Delftia
neg.ctrl_PCR_2_4401822	k__Bacteria;p__Proteobacteria;c__Betaproteobacteria;o__Burkholderiales;f__Comamonadaceae;g__Delftia;	Bacteria	Proteobacteria	Betaproteobacteria	Burkholderiales	Comamonadaceae	Delftia
neg.ctrl_PCR_4_10370349	k__Bacteria;p__Proteobacteria;c__Betaproteobacteria;o__Burkholderiales;f__Comamonadaceae;g__Delftia;	Bacteria	Proteobacteria	Betaproteobacteria	Burkholderiales	Comamonadaceae	Delftia
neg.ctrl_PCR_4_10414836	k__Bacteria;p__Proteobacteria;c__Betaproteobacteria;o__Burkholderiales;f__Comamonadaceae;g__Delftia;	Bacteria	Proteobacteria	Betaproteobacteria	Burkholderiales	Comamonadaceae	Delftia
neg.ctrl_PCR_4_10689373	k__Bacteria;p__Proteobacteria;c__Betaproteobacteria;o__Burkholderiales;f__Comamonadaceae;g__Delftia;	Bacteria	Proteobacteria	Betaproteobacteria	Burkholderiales	Comamonadaceae	Delftia
neg.ctrl_PCR_4_11404971	k__Bacteria;p__Proteobacteria;c__Betaproteobacteria;o__Burkholderiales;f__Comamonadaceae;g__Delftia;	Bacteria	Proteobacteria	Betaproteobacteria	Burkholderiales	Comamonadaceae	Delftia
neg.ctrl_PCR_4_11809277	k__Bacteria;p__Proteobacteria;c__Betaproteobacteria;o__Burkholderiales;f__Comamonadaceae;g__Delftia;	Bacteria	Proteobacteria	Betaproteobacteria	Burkholderiales	Comamonadaceae	Delftia
neg.ctrl_PCR_4_12340844	k__Bacteria;p__Proteobacteria;c__Betaproteobacteria;o__Burkholderiales;f__Comamonadaceae;g__Delftia;	Bacteria	Proteobacteria	Betaproteobacteria	Burkholderiales	Comamonadaceae	Delftia
neg.ctrl_PCR_4_8328277	k__Bacteria;p__Proteobacteria;c__Betaproteobacteria;o__Burkholderiales;f__Comamonadaceae;g__Delftia;	Bacteria	Proteobacteria	Betaproteobacteria	Burkholderiales	Comamonadaceae	Delftia
neg.ctrl_PCR_4_8432291	k__Bacteria;p__Proteobacteria;c__Betaproteobacteria;o__Burkholderiales;f__Comamonadaceae;g__Delftia;	Bacteria	Proteobacteria	Betaproteobacteria	Burkholderiales	Comamonadaceae	Delftia
neg.ctrl_PCR_4_8940036	k__Bacteria;p__Proteobacteria;c__Betaproteobacteria;o__Burkholderiales;f__Comamonadaceae;g__Delftia;	Bacteria	Proteobacteria	Betaproteobacteria	Burkholderiales	Comamonadaceae	Delftia
neg.ctrl_PCR_4_9235832	k__Bacteria;p__Proteobacteria;c__Betaproteobacteria;o__Burkholderiales;f__Comamonadaceae;g__Delftia;	Bacteria	Proteobacteria	Betaproteobacteria	Burkholderiales	Comamonadaceae	Delftia
neg.ctrl_PCR_4_9659368	k__Bacteria;p__Proteobacteria;c__Betaproteobacteria;o__Burkholderiales;f__Comamonadaceae;g__Delftia;	Bacteria	Proteobacteria	Betaproteobacteria	Burkholderiales	Comamonadaceae	Delftia
empty3_1939993	k__Bacteria;p__Proteobacteria;c__Betaproteobacteria;o__Burkholderiales;f__Comamonadaceae;g__Schlegelella;	Bacteria	Proteobacteria	Betaproteobacteria	Burkholderiales	Comamonadaceae	Schlegelella
empty3_2298989	k__Bacteria;p__Proteobacteria;c__Betaproteobacteria;o__Burkholderiales;f__Comamonadaceae;g__Schlegelella;	Bacteria	Proteobacteria	Betaproteobacteria	Burkholderiales	Comamonadaceae	Schlegelella
neg.ctrl7_2393528	k__Bacteria;p__Proteobacteria;c__Betaproteobacteria;o__Burkholderiales;f__Comamonadaceae;g__Schlegelella;	Bacteria	Proteobacteria	Betaproteobacteria	Burkholderiales	Comamonadaceae	Schlegelella
neg.ctrl7_2475871	k__Bacteria;p__Proteobacteria;c__Betaproteobacteria;o__Burkholderiales;f__Comamonadaceae;g__Schlegelella;	Bacteria	Proteobacteria	Betaproteobacteria	Burkholderiales	Comamonadaceae	Schlegelella
neg.ctrl7_2569081	k__Bacteria;p__Proteobacteria;c__Betaproteobacteria;o__Burkholderiales;f__Comamonadaceae;g__Schlegelella;	Bacteria	Proteobacteria	Betaproteobacteria	Burkholderiales	Comamonadaceae	Schlegelella
neg.ctrl7_2619314	k__Bacteria;p__Proteobacteria;c__Betaproteobacteria;o__Burkholderiales;f__Comamonadaceae;g__Schlegelella;	Bacteria	Proteobacteria	Betaproteobacteria	Burkholderiales	Comamonadaceae	Schlegelella
neg.ctrl7_2697171	k__Bacteria;p__Proteobacteria;c__Betaproteobacteria;o__Burkholderiales;f__Comamonadaceae;g__Schlegelella;	Bacteria	Proteobacteria	Betaproteobacteria	Burkholderiales	Comamonadaceae	Schlegelella
neg.ctrl7_3058004	k__Bacteria;p__Proteobacteria;c__Betaproteobacteria;o__Burkholderiales;f__Comamonadaceae;g__Schlegelella;	Bacteria	Proteobacteria	Betaproteobacteria	Burkholderiales	Comamonadaceae	Schlegelella
neg.ctrl7_3714201	k__Bacteria;p__Proteobacteria;c__Betaproteobacteria;o__Burkholderiales;f__Comamonadaceae;g__Schlegelella;	Bacteria	Proteobacteria	Betaproteobacteria	Burkholderiales	Comamonadaceae	Schlegelella
neg.ctrl7_3716584	k__Bacteria;p__Proteobacteria;c__Betaproteobacteria;o__Burkholderiales;f__Comamonadaceae;g__Schlegelella;	Bacteria	Proteobacteria	Betaproteobacteria	Burkholderiales	Comamonadaceae	Schlegelella
neg.ctrl7_3812780	k__Bacteria;p__Proteobacteria;c__Betaproteobacteria;o__Burkholderiales;f__Comamonadaceae;g__Schlegelella;	Bacteria	Proteobacteria	Betaproteobacteria	Burkholderiales	Comamonadaceae	Schlegelella
neg.ctrl7_2272805	k__Bacteria;p__Proteobacteria;c__Betaproteobacteria;o__Burkholderiales;f__Comamonadaceae;g__Tepidimonas;	Bacteria	Proteobacteria	Betaproteobacteria	Burkholderiales	Comamonadaceae	Tepidimonas
neg.ctrl7_2379722	k__Bacteria;p__Proteobacteria;c__Betaproteobacteria;o__Burkholderiales;f__Comamonadaceae;g__Tepidimonas;	Bacteria	Proteobacteria	Betaproteobacteria	Burkholderiales	Comamonadaceae	Tepidimonas
neg.ctrl7_2859360	k__Bacteria;p__Proteobacteria;c__Betaproteobacteria;o__Burkholderiales;f__Comamonadaceae;g__Tepidimonas;	Bacteria	Proteobacteria	Betaproteobacteria	Burkholderiales	Comamonadaceae	Tepidimonas
neg.ctrl7_3604001	k__Bacteria;p__Proteobacteria;c__Betaproteobacteria;o__Burkholderiales;f__Comamonadaceae;g__Tepidimonas;	Bacteria	Proteobacteria	Betaproteobacteria	Burkholderiales	Comamonadaceae	Tepidimonas
neg.ctrl7_4124256	k__Bacteria;p__Proteobacteria;c__Betaproteobacteria;o__Burkholderiales;f__Comamonadaceae;g__Tepidimonas;	Bacteria	Proteobacteria	Betaproteobacteria	Burkholderiales	Comamonadaceae	Tepidimonas
empty1_1422670	k__Bacteria;p__Proteobacteria;c__Betaproteobacteria;o__Burkholderiales;f__Comamonadaceae;	Bacteria	Proteobacteria	Betaproteobacteria	Burkholderiales	Comamonadaceae
empty1_2432617	k__Bacteria;p__Proteobacteria;c__Betaproteobacteria;o__Burkholderiales;f__Comamonadaceae;	Bacteria	Proteobacteria	Betaproteobacteria	Burkholderiales	Comamonadaceae
empty3_1298114	k__Bacteria;p__Proteobacteria;c__Betaproteobacteria;o__Burkholderiales;f__Comamonadaceae;	Bacteria	Proteobacteria	Betaproteobacteria	Burkholderiales	Comamonadaceae
empty3_1456889	k__Bacteria;p__Proteobacteria;c__Betaproteobacteria;o__Burkholderiales;f__Comamonadaceae;	Bacteria	Proteobacteria	Betaproteobacteria	Burkholderiales	Comamonadaceae
empty3_2146651	k__Bacteria;p__Proteobacteria;c__Betaproteobacteria;o__Burkholderiales;f__Comamonadaceae;	Bacteria	Proteobacteria	Betaproteobacteria	Burkholderiales	Comamonadaceae
neg.ctrl_PCR_2_4046689	k__Bacteria;p__Proteobacteria;c__Betaproteobacteria;o__Burkholderiales;f__Comamonadaceae;	Bacteria	Proteobacteria	Betaproteobacteria	Burkholderiales	Comamonadaceae
neg.ctrl_PCR_3_4499128	k__Bacteria;p__Proteobacteria;c__Betaproteobacteria;o__Burkholderiales;f__Comamonadaceae;	Bacteria	Proteobacteria	Betaproteobacteria	Burkholderiales	Comamonadaceae
neg.ctrl_PCR_3_6203801	k__Bacteria;p__Proteobacteria;c__Betaproteobacteria;o__Burkholderiales;f__Comamonadaceae;	Bacteria	Proteobacteria	Betaproteobacteria	Burkholderiales	Comamonadaceae
neg.ctrl_PCR_3_7720860	k__Bacteria;p__Proteobacteria;c__Betaproteobacteria;o__Burkholderiales;f__Comamonadaceae;	Bacteria	Proteobacteria	Betaproteobacteria	Burkholderiales	Comamonadaceae
neg.ctrl_PCR_3_7826909	k__Bacteria;p__Proteobacteria;c__Betaproteobacteria;o__Burkholderiales;f__Comamonadaceae;	Bacteria	Proteobacteria	Betaproteobacteria	Burkholderiales	Comamonadaceae
neg.ctrl_PCR_4_10057309	k__Bacteria;p__Proteobacteria;c__Betaproteobacteria;o__Burkholderiales;f__Comamonadaceae;	Bacteria	Proteobacteria	Betaproteobacteria	Burkholderiales	Comamonadaceae
neg.ctrl_PCR_4_10080167	k__Bacteria;p__Proteobacteria;c__Betaproteobacteria;o__Burkholderiales;f__Comamonadaceae;	Bacteria	Proteobacteria	Betaproteobacteria	Burkholderiales	Comamonadaceae
neg.ctrl_PCR_4_10170875	k__Bacteria;p__Proteobacteria;c__Betaproteobacteria;o__Burkholderiales;f__Comamonadaceae;	Bacteria	Proteobacteria	Betaproteobacteria	Burkholderiales	Comamonadaceae
neg.ctrl_PCR_4_10175078	k__Bacteria;p__Proteobacteria;c__Betaproteobacteria;o__Burkholderiales;f__Comamonadaceae;	Bacteria	Proteobacteria	Betaproteobacteria	Burkholderiales	Comamonadaceae
neg.ctrl_PCR_4_10181700	k__Bacteria;p__Proteobacteria;c__Betaproteobacteria;o__Burkholderiales;f__Comamonadaceae;	Bacteria	Proteobacteria	Betaproteobacteria	Burkholderiales	Comamonadaceae
neg.ctrl_PCR_4_10211971	k__Bacteria;p__Proteobacteria;c__Betaproteobacteria;o__Burkholderiales;f__Comamonadaceae;	Bacteria	Proteobacteria	Betaproteobacteria	Burkholderiales	Comamonadaceae
neg.ctrl_PCR_4_10319957	k__Bacteria;p__Proteobacteria;c__Betaproteobacteria;o__Burkholderiales;f__Comamonadaceae;	Bacteria	Proteobacteria	Betaproteobacteria	Burkholderiales	Comamonadaceae
neg.ctrl_PCR_4_10470321	k__Bacteria;p__Proteobacteria;c__Betaproteobacteria;o__Burkholderiales;f__Comamonadaceae;	Bacteria	Proteobacteria	Betaproteobacteria	Burkholderiales	Comamonadaceae
neg.ctrl_PCR_4_10558193	k__Bacteria;p__Proteobacteria;c__Betaproteobacteria;o__Burkholderiales;f__Comamonadaceae;	Bacteria	Proteobacteria	Betaproteobacteria	Burkholderiales	Comamonadaceae
neg.ctrl_PCR_4_10627932	k__Bacteria;p__Proteobacteria;c__Betaproteobacteria;o__Burkholderiales;f__Comamonadaceae;	Bacteria	Proteobacteria	Betaproteobacteria	Burkholderiales	Comamonadaceae
neg.ctrl_PCR_4_10675386	k__Bacteria;p__Proteobacteria;c__Betaproteobacteria;o__Burkholderiales;f__Comamonadaceae;	Bacteria	Proteobacteria	Betaproteobacteria	Burkholderiales	Comamonadaceae
neg.ctrl_PCR_4_10686935	k__Bacteria;p__Proteobacteria;c__Betaproteobacteria;o__Burkholderiales;f__Comamonadaceae;	Bacteria	Proteobacteria	Betaproteobacteria	Burkholderiales	Comamonadaceae
neg.ctrl_PCR_4_10785646	k__Bacteria;p__Proteobacteria;c__Betaproteobacteria;o__Burkholderiales;f__Comamonadaceae;	Bacteria	Proteobacteria	Betaproteobacteria	Burkholderiales	Comamonadaceae
neg.ctrl_PCR_4_10820957	k__Bacteria;p__Proteobacteria;c__Betaproteobacteria;o__Burkholderiales;f__Comamonadaceae;	Bacteria	Proteobacteria	Betaproteobacteria	Burkholderiales	Comamonadaceae
neg.ctrl_PCR_4_10875876	k__Bacteria;p__Proteobacteria;c__Betaproteobacteria;o__Burkholderiales;f__Comamonadaceae;	Bacteria	Proteobacteria	Betaproteobacteria	Burkholderiales	Comamonadaceae
neg.ctrl_PCR_4_10913759	k__Bacteria;p__Proteobacteria;c__Betaproteobacteria;o__Burkholderiales;f__Comamonadaceae;	Bacteria	Proteobacteria	Betaproteobacteria	Burkholderiales	Comamonadaceae
neg.ctrl_PCR_4_10973204	k__Bacteria;p__Proteobacteria;c__Betaproteobacteria;o__Burkholderiales;f__Comamonadaceae;	Bacteria	Proteobacteria	Betaproteobacteria	Burkholderiales	Comamonadaceae
neg.ctrl_PCR_4_11030162	k__Bacteria;p__Proteobacteria;c__Betaproteobacteria;o__Burkholderiales;f__Comamonadaceae;	Bacteria	Proteobacteria	Betaproteobacteria	Burkholderiales	Comamonadaceae
neg.ctrl_PCR_4_11078957	k__Bacteria;p__Proteobacteria;c__Betaproteobacteria;o__Burkholderiales;f__Comamonadaceae;	Bacteria	Proteobacteria	Betaproteobacteria	Burkholderiales	Comamonadaceae
neg.ctrl_PCR_4_11120994	k__Bacteria;p__Proteobacteria;c__Betaproteobacteria;o__Burkholderiales;f__Comamonadaceae;	Bacteria	Proteobacteria	Betaproteobacteria	Burkholderiales	Comamonadaceae
neg.ctrl_PCR_4_11152751	k__Bacteria;p__Proteobacteria;c__Betaproteobacteria;o__Burkholderiales;f__Comamonadaceae;	Bacteria	Proteobacteria	Betaproteobacteria	Burkholderiales	Comamonadaceae
neg.ctrl_PCR_4_11233766	k__Bacteria;p__Proteobacteria;c__Betaproteobacteria;o__Burkholderiales;f__Comamonadaceae;	Bacteria	Proteobacteria	Betaproteobacteria	Burkholderiales	Comamonadaceae
neg.ctrl_PCR_4_11262038	k__Bacteria;p__Proteobacteria;c__Betaproteobacteria;o__Burkholderiales;f__Comamonadaceae;	Bacteria	Proteobacteria	Betaproteobacteria	Burkholderiales	Comamonadaceae
neg.ctrl_PCR_4_11272305	k__Bacteria;p__Proteobacteria;c__Betaproteobacteria;o__Burkholderiales;f__Comamonadaceae;	Bacteria	Proteobacteria	Betaproteobacteria	Burkholderiales	Comamonadaceae
neg.ctrl_PCR_4_11302316	k__Bacteria;p__Proteobacteria;c__Betaproteobacteria;o__Burkholderiales;f__Comamonadaceae;	Bacteria	Proteobacteria	Betaproteobacteria	Burkholderiales	Comamonadaceae
neg.ctrl_PCR_4_11334459	k__Bacteria;p__Proteobacteria;c__Betaproteobacteria;o__Burkholderiales;f__Comamonadaceae;	Bacteria	Proteobacteria	Betaproteobacteria	Burkholderiales	Comamonadaceae
neg.ctrl_PCR_4_11404522	k__Bacteria;p__Proteobacteria;c__Betaproteobacteria;o__Burkholderiales;f__Comamonadaceae;	Bacteria	Proteobacteria	Betaproteobacteria	Burkholderiales	Comamonadaceae
neg.ctrl_PCR_4_11464244	k__Bacteria;p__Proteobacteria;c__Betaproteobacteria;o__Burkholderiales;f__Comamonadaceae;	Bacteria	Proteobacteria	Betaproteobacteria	Burkholderiales	Comamonadaceae
neg.ctrl_PCR_4_11585252	k__Bacteria;p__Proteobacteria;c__Betaproteobacteria;o__Burkholderiales;f__Comamonadaceae;	Bacteria	Proteobacteria	Betaproteobacteria	Burkholderiales	Comamonadaceae
neg.ctrl_PCR_4_11824125	k__Bacteria;p__Proteobacteria;c__Betaproteobacteria;o__Burkholderiales;f__Comamonadaceae;	Bacteria	Proteobacteria	Betaproteobacteria	Burkholderiales	Comamonadaceae
neg.ctrl_PCR_4_11991621	k__Bacteria;p__Proteobacteria;c__Betaproteobacteria;o__Burkholderiales;f__Comamonadaceae;	Bacteria	Proteobacteria	Betaproteobacteria	Burkholderiales	Comamonadaceae
neg.ctrl_PCR_4_12078989	k__Bacteria;p__Proteobacteria;c__Betaproteobacteria;o__Burkholderiales;f__Comamonadaceae;	Bacteria	Proteobacteria	Betaproteobacteria	Burkholderiales	Comamonadaceae
neg.ctrl_PCR_4_12083363	k__Bacteria;p__Proteobacteria;c__Betaproteobacteria;o__Burkholderiales;f__Comamonadaceae;	Bacteria	Proteobacteria	Betaproteobacteria	Burkholderiales	Comamonadaceae
neg.ctrl_PCR_4_12125907	k__Bacteria;p__Proteobacteria;c__Betaproteobacteria;o__Burkholderiales;f__Comamonadaceae;	Bacteria	Proteobacteria	Betaproteobacteria	Burkholderiales	Comamonadaceae
neg.ctrl_PCR_4_12205103	k__Bacteria;p__Proteobacteria;c__Betaproteobacteria;o__Burkholderiales;f__Comamonadaceae;	Bacteria	Proteobacteria	Betaproteobacteria	Burkholderiales	Comamonadaceae
neg.ctrl_PCR_4_12251306	k__Bacteria;p__Proteobacteria;c__Betaproteobacteria;o__Burkholderiales;f__Comamonadaceae;	Bacteria	Proteobacteria	Betaproteobacteria	Burkholderiales	Comamonadaceae
neg.ctrl_PCR_4_12259834	k__Bacteria;p__Proteobacteria;c__Betaproteobacteria;o__Burkholderiales;f__Comamonadaceae;	Bacteria	Proteobacteria	Betaproteobacteria	Burkholderiales	Comamonadaceae
neg.ctrl_PCR_4_12397009	k__Bacteria;p__Proteobacteria;c__Betaproteobacteria;o__Burkholderiales;f__Comamonadaceae;	Bacteria	Proteobacteria	Betaproteobacteria	Burkholderiales	Comamonadaceae
neg.ctrl_PCR_4_12400488	k__Bacteria;p__Proteobacteria;c__Betaproteobacteria;o__Burkholderiales;f__Comamonadaceae;	Bacteria	Proteobacteria	Betaproteobacteria	Burkholderiales	Comamonadaceae
neg.ctrl_PCR_4_12414710	k__Bacteria;p__Proteobacteria;c__Betaproteobacteria;o__Burkholderiales;f__Comamonadaceae;	Bacteria	Proteobacteria	Betaproteobacteria	Burkholderiales	Comamonadaceae
neg.ctrl_PCR_4_12427019	k__Bacteria;p__Proteobacteria;c__Betaproteobacteria;o__Burkholderiales;f__Comamonadaceae;	Bacteria	Proteobacteria	Betaproteobacteria	Burkholderiales	Comamonadaceae
neg.ctrl_PCR_4_12465144	k__Bacteria;p__Proteobacteria;c__Betaproteobacteria;o__Burkholderiales;f__Comamonadaceae;	Bacteria	Proteobacteria	Betaproteobacteria	Burkholderiales	Comamonadaceae
neg.ctrl_PCR_4_12518898	k__Bacteria;p__Proteobacteria;c__Betaproteobacteria;o__Burkholderiales;f__Comamonadaceae;	Bacteria	Proteobacteria	Betaproteobacteria	Burkholderiales	Comamonadaceae
neg.ctrl_PCR_4_12580340	k__Bacteria;p__Proteobacteria;c__Betaproteobacteria;o__Burkholderiales;f__Comamonadaceae;	Bacteria	Proteobacteria	Betaproteobacteria	Burkholderiales	Comamonadaceae
neg.ctrl_PCR_4_12617895	k__Bacteria;p__Proteobacteria;c__Betaproteobacteria;o__Burkholderiales;f__Comamonadaceae;	Bacteria	Proteobacteria	Betaproteobacteria	Burkholderiales	Comamonadaceae
neg.ctrl_PCR_4_12679137	k__Bacteria;p__Proteobacteria;c__Betaproteobacteria;o__Burkholderiales;f__Comamonadaceae;	Bacteria	Proteobacteria	Betaproteobacteria	Burkholderiales	Comamonadaceae
neg.ctrl_PCR_4_12734916	k__Bacteria;p__Proteobacteria;c__Betaproteobacteria;o__Burkholderiales;f__Comamonadaceae;	Bacteria	Proteobacteria	Betaproteobacteria	Burkholderiales	Comamonadaceae
neg.ctrl_PCR_4_12749131	k__Bacteria;p__Proteobacteria;c__Betaproteobacteria;o__Burkholderiales;f__Comamonadaceae;	Bacteria	Proteobacteria	Betaproteobacteria	Burkholderiales	Comamonadaceae
neg.ctrl_PCR_4_12788913	k__Bacteria;p__Proteobacteria;c__Betaproteobacteria;o__Burkholderiales;f__Comamonadaceae;	Bacteria	Proteobacteria	Betaproteobacteria	Burkholderiales	Comamonadaceae
neg.ctrl_PCR_4_12792623	k__Bacteria;p__Proteobacteria;c__Betaproteobacteria;o__Burkholderiales;f__Comamonadaceae;	Bacteria	Proteobacteria	Betaproteobacteria	Burkholderiales	Comamonadaceae
neg.ctrl_PCR_4_12795973	k__Bacteria;p__Proteobacteria;c__Betaproteobacteria;o__Burkholderiales;f__Comamonadaceae;	Bacteria	Proteobacteria	Betaproteobacteria	Burkholderiales	Comamonadaceae
neg.ctrl_PCR_4_12817089	k__Bacteria;p__Proteobacteria;c__Betaproteobacteria;o__Burkholderiales;f__Comamonadaceae;	Bacteria	Proteobacteria	Betaproteobacteria	Burkholderiales	Comamonadaceae
neg.ctrl_PCR_4_12820526	k__Bacteria;p__Proteobacteria;c__Betaproteobacteria;o__Burkholderiales;f__Comamonadaceae;	Bacteria	Proteobacteria	Betaproteobacteria	Burkholderiales	Comamonadaceae
neg.ctrl_PCR_4_12825247	k__Bacteria;p__Proteobacteria;c__Betaproteobacteria;o__Burkholderiales;f__Comamonadaceae;	Bacteria	Proteobacteria	Betaproteobacteria	Burkholderiales	Comamonadaceae
neg.ctrl_PCR_4_12829551	k__Bacteria;p__Proteobacteria;c__Betaproteobacteria;o__Burkholderiales;f__Comamonadaceae;	Bacteria	Proteobacteria	Betaproteobacteria	Burkholderiales	Comamonadaceae
neg.ctrl_PCR_4_12850847	k__Bacteria;p__Proteobacteria;c__Betaproteobacteria;o__Burkholderiales;f__Comamonadaceae;	Bacteria	Proteobacteria	Betaproteobacteria	Burkholderiales	Comamonadaceae
neg.ctrl_PCR_4_12895296	k__Bacteria;p__Proteobacteria;c__Betaproteobacteria;o__Burkholderiales;f__Comamonadaceae;	Bacteria	Proteobacteria	Betaproteobacteria	Burkholderiales	Comamonadaceae
neg.ctrl_PCR_4_12917940	k__Bacteria;p__Proteobacteria;c__Betaproteobacteria;o__Burkholderiales;f__Comamonadaceae;	Bacteria	Proteobacteria	Betaproteobacteria	Burkholderiales	Comamonadaceae
neg.ctrl_PCR_4_12918969	k__Bacteria;p__Proteobacteria;c__Betaproteobacteria;o__Burkholderiales;f__Comamonadaceae;	Bacteria	Proteobacteria	Betaproteobacteria	Burkholderiales	Comamonadaceae
neg.ctrl_PCR_4_12952025	k__Bacteria;p__Proteobacteria;c__Betaproteobacteria;o__Burkholderiales;f__Comamonadaceae;	Bacteria	Proteobacteria	Betaproteobacteria	Burkholderiales	Comamonadaceae
neg.ctrl_PCR_4_7616325	k__Bacteria;p__Proteobacteria;c__Betaproteobacteria;o__Burkholderiales;f__Comamonadaceae;	Bacteria	Proteobacteria	Betaproteobacteria	Burkholderiales	Comamonadaceae
neg.ctrl_PCR_4_7664226	k__Bacteria;p__Proteobacteria;c__Betaproteobacteria;o__Burkholderiales;f__Comamonadaceae;	Bacteria	Proteobacteria	Betaproteobacteria	Burkholderiales	Comamonadaceae
neg.ctrl_PCR_4_7683210	k__Bacteria;p__Proteobacteria;c__Betaproteobacteria;o__Burkholderiales;f__Comamonadaceae;	Bacteria	Proteobacteria	Betaproteobacteria	Burkholderiales	Comamonadaceae
neg.ctrl_PCR_4_7709149	k__Bacteria;p__Proteobacteria;c__Betaproteobacteria;o__Burkholderiales;f__Comamonadaceae;	Bacteria	Proteobacteria	Betaproteobacteria	Burkholderiales	Comamonadaceae
neg.ctrl_PCR_4_7721652	k__Bacteria;p__Proteobacteria;c__Betaproteobacteria;o__Burkholderiales;f__Comamonadaceae;	Bacteria	Proteobacteria	Betaproteobacteria	Burkholderiales	Comamonadaceae
neg.ctrl_PCR_4_7782732	k__Bacteria;p__Proteobacteria;c__Betaproteobacteria;o__Burkholderiales;f__Comamonadaceae;	Bacteria	Proteobacteria	Betaproteobacteria	Burkholderiales	Comamonadaceae
neg.ctrl_PCR_4_7792885	k__Bacteria;p__Proteobacteria;c__Betaproteobacteria;o__Burkholderiales;f__Comamonadaceae;	Bacteria	Proteobacteria	Betaproteobacteria	Burkholderiales	Comamonadaceae
neg.ctrl_PCR_4_7903255	k__Bacteria;p__Proteobacteria;c__Betaproteobacteria;o__Burkholderiales;f__Comamonadaceae;	Bacteria	Proteobacteria	Betaproteobacteria	Burkholderiales	Comamonadaceae
neg.ctrl_PCR_4_7910989	k__Bacteria;p__Proteobacteria;c__Betaproteobacteria;o__Burkholderiales;f__Comamonadaceae;	Bacteria	Proteobacteria	Betaproteobacteria	Burkholderiales	Comamonadaceae
neg.ctrl_PCR_4_8146960	k__Bacteria;p__Proteobacteria;c__Betaproteobacteria;o__Burkholderiales;f__Comamonadaceae;	Bacteria	Proteobacteria	Betaproteobacteria	Burkholderiales	Comamonadaceae
neg.ctrl_PCR_4_8195871	k__Bacteria;p__Proteobacteria;c__Betaproteobacteria;o__Burkholderiales;f__Comamonadaceae;	Bacteria	Proteobacteria	Betaproteobacteria	Burkholderiales	Comamonadaceae
neg.ctrl_PCR_4_8307310	k__Bacteria;p__Proteobacteria;c__Betaproteobacteria;o__Burkholderiales;f__Comamonadaceae;	Bacteria	Proteobacteria	Betaproteobacteria	Burkholderiales	Comamonadaceae
neg.ctrl_PCR_4_8313533	k__Bacteria;p__Proteobacteria;c__Betaproteobacteria;o__Burkholderiales;f__Comamonadaceae;	Bacteria	Proteobacteria	Betaproteobacteria	Burkholderiales	Comamonadaceae
neg.ctrl_PCR_4_8490831	k__Bacteria;p__Proteobacteria;c__Betaproteobacteria;o__Burkholderiales;f__Comamonadaceae;	Bacteria	Proteobacteria	Betaproteobacteria	Burkholderiales	Comamonadaceae
neg.ctrl_PCR_4_8640677	k__Bacteria;p__Proteobacteria;c__Betaproteobacteria;o__Burkholderiales;f__Comamonadaceae;	Bacteria	Proteobacteria	Betaproteobacteria	Burkholderiales	Comamonadaceae
neg.ctrl_PCR_4_8656691	k__Bacteria;p__Proteobacteria;c__Betaproteobacteria;o__Burkholderiales;f__Comamonadaceae;	Bacteria	Proteobacteria	Betaproteobacteria	Burkholderiales	Comamonadaceae
neg.ctrl_PCR_4_8684932	k__Bacteria;p__Proteobacteria;c__Betaproteobacteria;o__Burkholderiales;f__Comamonadaceae;	Bacteria	Proteobacteria	Betaproteobacteria	Burkholderiales	Comamonadaceae
neg.ctrl_PCR_4_8728413	k__Bacteria;p__Proteobacteria;c__Betaproteobacteria;o__Burkholderiales;f__Comamonadaceae;	Bacteria	Proteobacteria	Betaproteobacteria	Burkholderiales	Comamonadaceae
neg.ctrl_PCR_4_8764848	k__Bacteria;p__Proteobacteria;c__Betaproteobacteria;o__Burkholderiales;f__Comamonadaceae;	Bacteria	Proteobacteria	Betaproteobacteria	Burkholderiales	Comamonadaceae
neg.ctrl_PCR_4_8784816	k__Bacteria;p__Proteobacteria;c__Betaproteobacteria;o__Burkholderiales;f__Comamonadaceae;	Bacteria	Proteobacteria	Betaproteobacteria	Burkholderiales	Comamonadaceae
neg.ctrl_PCR_4_8982491	k__Bacteria;p__Proteobacteria;c__Betaproteobacteria;o__Burkholderiales;f__Comamonadaceae;	Bacteria	Proteobacteria	Betaproteobacteria	Burkholderiales	Comamonadaceae
neg.ctrl_PCR_4_9050883	k__Bacteria;p__Proteobacteria;c__Betaproteobacteria;o__Burkholderiales;f__Comamonadaceae;	Bacteria	Proteobacteria	Betaproteobacteria	Burkholderiales	Comamonadaceae
neg.ctrl_PCR_4_9072930	k__Bacteria;p__Proteobacteria;c__Betaproteobacteria;o__Burkholderiales;f__Comamonadaceae;	Bacteria	Proteobacteria	Betaproteobacteria	Burkholderiales	Comamonadaceae
neg.ctrl_PCR_4_9156013	k__Bacteria;p__Proteobacteria;c__Betaproteobacteria;o__Burkholderiales;f__Comamonadaceae;	Bacteria	Proteobacteria	Betaproteobacteria	Burkholderiales	Comamonadaceae
neg.ctrl_PCR_4_9288869	k__Bacteria;p__Proteobacteria;c__Betaproteobacteria;o__Burkholderiales;f__Comamonadaceae;	Bacteria	Proteobacteria	Betaproteobacteria	Burkholderiales	Comamonadaceae
neg.ctrl_PCR_4_9291273	k__Bacteria;p__Proteobacteria;c__Betaproteobacteria;o__Burkholderiales;f__Comamonadaceae;	Bacteria	Proteobacteria	Betaproteobacteria	Burkholderiales	Comamonadaceae
neg.ctrl_PCR_4_9407088	k__Bacteria;p__Proteobacteria;c__Betaproteobacteria;o__Burkholderiales;f__Comamonadaceae;	Bacteria	Proteobacteria	Betaproteobacteria	Burkholderiales	Comamonadaceae
neg.ctrl_PCR_4_9430013	k__Bacteria;p__Proteobacteria;c__Betaproteobacteria;o__Burkholderiales;f__Comamonadaceae;	Bacteria	Proteobacteria	Betaproteobacteria	Burkholderiales	Comamonadaceae
neg.ctrl_PCR_4_9431774	k__Bacteria;p__Proteobacteria;c__Betaproteobacteria;o__Burkholderiales;f__Comamonadaceae;	Bacteria	Proteobacteria	Betaproteobacteria	Burkholderiales	Comamonadaceae
neg.ctrl_PCR_4_9526940	k__Bacteria;p__Proteobacteria;c__Betaproteobacteria;o__Burkholderiales;f__Comamonadaceae;	Bacteria	Proteobacteria	Betaproteobacteria	Burkholderiales	Comamonadaceae
neg.ctrl_PCR_4_9754878	k__Bacteria;p__Proteobacteria;c__Betaproteobacteria;o__Burkholderiales;f__Comamonadaceae;	Bacteria	Proteobacteria	Betaproteobacteria	Burkholderiales	Comamonadaceae
neg.ctrl_PCR_4_9826572	k__Bacteria;p__Proteobacteria;c__Betaproteobacteria;o__Burkholderiales;f__Comamonadaceae;	Bacteria	Proteobacteria	Betaproteobacteria	Burkholderiales	Comamonadaceae
neg.ctrl_PCR_4_9837568	k__Bacteria;p__Proteobacteria;c__Betaproteobacteria;o__Burkholderiales;f__Comamonadaceae;	Bacteria	Proteobacteria	Betaproteobacteria	Burkholderiales	Comamonadaceae
neg.ctrl_PCR_4_9866184	k__Bacteria;p__Proteobacteria;c__Betaproteobacteria;o__Burkholderiales;f__Comamonadaceae;	Bacteria	Proteobacteria	Betaproteobacteria	Burkholderiales	Comamonadaceae
neg.ctrl_PCR_4_9894409	k__Bacteria;p__Proteobacteria;c__Betaproteobacteria;o__Burkholderiales;f__Comamonadaceae;	Bacteria	Proteobacteria	Betaproteobacteria	Burkholderiales	Comamonadaceae
neg.ctrl_PCR_4_9937679	k__Bacteria;p__Proteobacteria;c__Betaproteobacteria;o__Burkholderiales;f__Comamonadaceae;	Bacteria	Proteobacteria	Betaproteobacteria	Burkholderiales	Comamonadaceae
neg.ctrl_PCR_4_9950636	k__Bacteria;p__Proteobacteria;c__Betaproteobacteria;o__Burkholderiales;f__Comamonadaceae;	Bacteria	Proteobacteria	Betaproteobacteria	Burkholderiales	Comamonadaceae
neg.ctrl_PCR_4_9975037	k__Bacteria;p__Proteobacteria;c__Betaproteobacteria;o__Burkholderiales;f__Comamonadaceae;	Bacteria	Proteobacteria	Betaproteobacteria	Burkholderiales	Comamonadaceae
neg.ctrl_PCR_5_10319772	k__Bacteria;p__Proteobacteria;c__Betaproteobacteria;o__Burkholderiales;f__Comamonadaceae;	Bacteria	Proteobacteria	Betaproteobacteria	Burkholderiales	Comamonadaceae
neg.ctrl_PCR_5_10550953	k__Bacteria;p__Proteobacteria;c__Betaproteobacteria;o__Burkholderiales;f__Comamonadaceae;	Bacteria	Proteobacteria	Betaproteobacteria	Burkholderiales	Comamonadaceae
neg.ctrl_PCR_5_11655343	k__Bacteria;p__Proteobacteria;c__Betaproteobacteria;o__Burkholderiales;f__Comamonadaceae;	Bacteria	Proteobacteria	Betaproteobacteria	Burkholderiales	Comamonadaceae
neg.ctrl_PCR_5_11962296	k__Bacteria;p__Proteobacteria;c__Betaproteobacteria;o__Burkholderiales;f__Comamonadaceae;	Bacteria	Proteobacteria	Betaproteobacteria	Burkholderiales	Comamonadaceae
neg.ctrl_PCR_5_12031207	k__Bacteria;p__Proteobacteria;c__Betaproteobacteria;o__Burkholderiales;f__Comamonadaceae;	Bacteria	Proteobacteria	Betaproteobacteria	Burkholderiales	Comamonadaceae
neg.ctrl_PCR_5_13430958	k__Bacteria;p__Proteobacteria;c__Betaproteobacteria;o__Burkholderiales;f__Comamonadaceae;	Bacteria	Proteobacteria	Betaproteobacteria	Burkholderiales	Comamonadaceae
neg.ctrl_PCR_5_13489701	k__Bacteria;p__Proteobacteria;c__Betaproteobacteria;o__Burkholderiales;f__Comamonadaceae;	Bacteria	Proteobacteria	Betaproteobacteria	Burkholderiales	Comamonadaceae
neg.ctrl_PCR_5_13570599	k__Bacteria;p__Proteobacteria;c__Betaproteobacteria;o__Burkholderiales;f__Comamonadaceae;	Bacteria	Proteobacteria	Betaproteobacteria	Burkholderiales	Comamonadaceae
neg.ctrl_PCR_5_13600240	k__Bacteria;p__Proteobacteria;c__Betaproteobacteria;o__Burkholderiales;f__Comamonadaceae;	Bacteria	Proteobacteria	Betaproteobacteria	Burkholderiales	Comamonadaceae
neg.ctrl_PCR_5_13774506	k__Bacteria;p__Proteobacteria;c__Betaproteobacteria;o__Burkholderiales;f__Comamonadaceae;	Bacteria	Proteobacteria	Betaproteobacteria	Burkholderiales	Comamonadaceae
neg.ctrl_PCR_5_13897652	k__Bacteria;p__Proteobacteria;c__Betaproteobacteria;o__Burkholderiales;f__Comamonadaceae;	Bacteria	Proteobacteria	Betaproteobacteria	Burkholderiales	Comamonadaceae
neg.ctrl_PCR_5_14107304	k__Bacteria;p__Proteobacteria;c__Betaproteobacteria;o__Burkholderiales;f__Comamonadaceae;	Bacteria	Proteobacteria	Betaproteobacteria	Burkholderiales	Comamonadaceae
neg.ctrl4_1955889	k__Bacteria;p__Proteobacteria;c__Betaproteobacteria;o__Burkholderiales;f__Comamonadaceae;	Bacteria	Proteobacteria	Betaproteobacteria	Burkholderiales	Comamonadaceae
neg.ctrl4_2201954	k__Bacteria;p__Proteobacteria;c__Betaproteobacteria;o__Burkholderiales;f__Comamonadaceae;	Bacteria	Proteobacteria	Betaproteobacteria	Burkholderiales	Comamonadaceae
neg.ctrl4_2580365	k__Bacteria;p__Proteobacteria;c__Betaproteobacteria;o__Burkholderiales;f__Comamonadaceae;	Bacteria	Proteobacteria	Betaproteobacteria	Burkholderiales	Comamonadaceae
neg.ctrl6_2095855	k__Bacteria;p__Proteobacteria;c__Betaproteobacteria;o__Burkholderiales;f__Comamonadaceae;	Bacteria	Proteobacteria	Betaproteobacteria	Burkholderiales	Comamonadaceae
neg.ctrl6_2107076	k__Bacteria;p__Proteobacteria;c__Betaproteobacteria;o__Burkholderiales;f__Comamonadaceae;	Bacteria	Proteobacteria	Betaproteobacteria	Burkholderiales	Comamonadaceae
neg.ctrl6_2224126	k__Bacteria;p__Proteobacteria;c__Betaproteobacteria;o__Burkholderiales;f__Comamonadaceae;	Bacteria	Proteobacteria	Betaproteobacteria	Burkholderiales	Comamonadaceae
neg.ctrl6_2650547	k__Bacteria;p__Proteobacteria;c__Betaproteobacteria;o__Burkholderiales;f__Comamonadaceae;	Bacteria	Proteobacteria	Betaproteobacteria	Burkholderiales	Comamonadaceae
neg.ctrl7_2753565	k__Bacteria;p__Proteobacteria;c__Betaproteobacteria;o__Burkholderiales;f__Comamonadaceae;	Bacteria	Proteobacteria	Betaproteobacteria	Burkholderiales	Comamonadaceae
neg.ctrl7_3472155	k__Bacteria;p__Proteobacteria;c__Betaproteobacteria;o__Burkholderiales;f__Comamonadaceae;	Bacteria	Proteobacteria	Betaproteobacteria	Burkholderiales	Comamonadaceae
neg.ctrl7_3975666	k__Bacteria;p__Proteobacteria;c__Betaproteobacteria;o__Burkholderiales;f__Comamonadaceae;	Bacteria	Proteobacteria	Betaproteobacteria	Burkholderiales	Comamonadaceae
empty3_1235527	k__Bacteria;p__Proteobacteria;c__Betaproteobacteria;o__Burkholderiales;f__Oxalobacteraceae;g__Janthinobacterium;s__lividum;	Bacteria	Proteobacteria	Betaproteobacteria	Burkholderiales	Oxalobacteraceae	Janthinobacterium	lividum
empty3_1649152	k__Bacteria;p__Proteobacteria;c__Betaproteobacteria;o__Burkholderiales;f__Oxalobacteraceae;g__Janthinobacterium;s__lividum;	Bacteria	Proteobacteria	Betaproteobacteria	Burkholderiales	Oxalobacteraceae	Janthinobacterium	lividum
empty3_1749683	k__Bacteria;p__Proteobacteria;c__Betaproteobacteria;o__Burkholderiales;f__Oxalobacteraceae;g__Janthinobacterium;s__lividum;	Bacteria	Proteobacteria	Betaproteobacteria	Burkholderiales	Oxalobacteraceae	Janthinobacterium	lividum
empty3_2342820	k__Bacteria;p__Proteobacteria;c__Betaproteobacteria;o__Burkholderiales;f__Oxalobacteraceae;	Bacteria	Proteobacteria	Betaproteobacteria	Burkholderiales	Oxalobacteraceae
neg.ctrl_PCR_3_5022559	k__Bacteria;p__Proteobacteria;c__Betaproteobacteria;o__Burkholderiales;f__Oxalobacteraceae;	Bacteria	Proteobacteria	Betaproteobacteria	Burkholderiales	Oxalobacteraceae
neg.ctrl_PCR_3_5327987	k__Bacteria;p__Proteobacteria;c__Betaproteobacteria;o__Burkholderiales;f__Oxalobacteraceae;	Bacteria	Proteobacteria	Betaproteobacteria	Burkholderiales	Oxalobacteraceae
neg.ctrl_PCR_5_12179683	k__Bacteria;p__Proteobacteria;c__Betaproteobacteria;o__Burkholderiales;f__Oxalobacteraceae;	Bacteria	Proteobacteria	Betaproteobacteria	Burkholderiales	Oxalobacteraceae
neg.ctrl_PCR_5_14127113	k__Bacteria;p__Proteobacteria;c__Betaproteobacteria;o__Burkholderiales;f__Oxalobacteraceae;	Bacteria	Proteobacteria	Betaproteobacteria	Burkholderiales	Oxalobacteraceae
empty3_2438953	k__Bacteria;p__Proteobacteria;c__Betaproteobacteria;o__Methylophilales;f__Methylophilaceae;g__Methylotenera;s__mobilis;	Bacteria	Proteobacteria	Betaproteobacteria	Methylophilales	Methylophilaceae	Methylotenera	mobilis
neg.ctrl5_4700417	k__Bacteria;p__Proteobacteria;c__Betaproteobacteria;o__Rhodocyclales;f__Rhodocyclaceae;g__Hydrogenophilus;	Bacteria	Proteobacteria	Betaproteobacteria	Rhodocyclales	Rhodocyclaceae	Hydrogenophilus
neg.ctrl5_6736531	k__Bacteria;p__Proteobacteria;c__Betaproteobacteria;o__Rhodocyclales;f__Rhodocyclaceae;g__Hydrogenophilus;	Bacteria	Proteobacteria	Betaproteobacteria	Rhodocyclales	Rhodocyclaceae	Hydrogenophilus
neg.ctrl5_6949772	k__Bacteria;p__Proteobacteria;c__Betaproteobacteria;o__Rhodocyclales;f__Rhodocyclaceae;g__Hydrogenophilus;	Bacteria	Proteobacteria	Betaproteobacteria	Rhodocyclales	Rhodocyclaceae	Hydrogenophilus
neg.ctrl7_2710757	k__Bacteria;p__Proteobacteria;c__Betaproteobacteria;o__Rhodocyclales;f__Rhodocyclaceae;g__Hydrogenophilus;	Bacteria	Proteobacteria	Betaproteobacteria	Rhodocyclales	Rhodocyclaceae	Hydrogenophilus
neg.ctrl7_3420508	k__Bacteria;p__Proteobacteria;c__Betaproteobacteria;o__Rhodocyclales;f__Rhodocyclaceae;g__Hydrogenophilus;	Bacteria	Proteobacteria	Betaproteobacteria	Rhodocyclales	Rhodocyclaceae	Hydrogenophilus
neg.ctrl7_3501334	k__Bacteria;p__Proteobacteria;c__Betaproteobacteria;o__Rhodocyclales;f__Rhodocyclaceae;g__Hydrogenophilus;	Bacteria	Proteobacteria	Betaproteobacteria	Rhodocyclales	Rhodocyclaceae	Hydrogenophilus
empty3_1437984	k__Bacteria;p__Proteobacteria;c__Deltaproteobacteria;	Bacteria	Proteobacteria	Deltaproteobacteria
empty3_1597598	k__Bacteria;p__Proteobacteria;c__Deltaproteobacteria;	Bacteria	Proteobacteria	Deltaproteobacteria
empty3_2243744	k__Bacteria;p__Proteobacteria;c__Gammaproteobacteria;o__Aeromonadales;f__Aeromonadaceae;	Bacteria	Proteobacteria	Gammaproteobacteria	Aeromonadales	Aeromonadaceae
empty3_1541554	k__Bacteria;p__Proteobacteria;c__Gammaproteobacteria;o__Enterobacteriales;f__Enterobacteriaceae;g__Salmonella;s__enterica;	Bacteria	Proteobacteria	Gammaproteobacteria	Enterobacteriales	Enterobacteriaceae	Salmonella	enterica
empty3_1554566	k__Bacteria;p__Proteobacteria;c__Gammaproteobacteria;o__Enterobacteriales;f__Enterobacteriaceae;g__Salmonella;s__enterica;	Bacteria	Proteobacteria	Gammaproteobacteria	Enterobacteriales	Enterobacteriaceae	Salmonella	enterica
empty3_1789692	k__Bacteria;p__Proteobacteria;c__Gammaproteobacteria;o__Enterobacteriales;f__Enterobacteriaceae;g__Salmonella;s__enterica;	Bacteria	Proteobacteria	Gammaproteobacteria	Enterobacteriales	Enterobacteriaceae	Salmonella	enterica
empty3_1868822	k__Bacteria;p__Proteobacteria;c__Gammaproteobacteria;o__Enterobacteriales;f__Enterobacteriaceae;g__Salmonella;s__enterica;	Bacteria	Proteobacteria	Gammaproteobacteria	Enterobacteriales	Enterobacteriaceae	Salmonella	enterica
empty3_1875016	k__Bacteria;p__Proteobacteria;c__Gammaproteobacteria;o__Enterobacteriales;f__Enterobacteriaceae;g__Salmonella;s__enterica;	Bacteria	Proteobacteria	Gammaproteobacteria	Enterobacteriales	Enterobacteriaceae	Salmonella	enterica
empty3_2360845	k__Bacteria;p__Proteobacteria;c__Gammaproteobacteria;o__Enterobacteriales;f__Enterobacteriaceae;g__Salmonella;s__enterica;	Bacteria	Proteobacteria	Gammaproteobacteria	Enterobacteriales	Enterobacteriaceae	Salmonella	enterica
neg.ctrl4_1501465	k__Bacteria;p__Proteobacteria;c__Gammaproteobacteria;o__Enterobacteriales;f__Enterobacteriaceae;	Bacteria	Proteobacteria	Gammaproteobacteria	Enterobacteriales	Enterobacteriaceae
neg.ctrl4_1817472	k__Bacteria;p__Proteobacteria;c__Gammaproteobacteria;o__Enterobacteriales;f__Enterobacteriaceae;	Bacteria	Proteobacteria	Gammaproteobacteria	Enterobacteriales	Enterobacteriaceae
neg.ctrl4_2033413	k__Bacteria;p__Proteobacteria;c__Gammaproteobacteria;o__Enterobacteriales;f__Enterobacteriaceae;	Bacteria	Proteobacteria	Gammaproteobacteria	Enterobacteriales	Enterobacteriaceae
neg.ctrl4_2062782	k__Bacteria;p__Proteobacteria;c__Gammaproteobacteria;o__Enterobacteriales;f__Enterobacteriaceae;	Bacteria	Proteobacteria	Gammaproteobacteria	Enterobacteriales	Enterobacteriaceae
neg.ctrl6_1930011	k__Bacteria;p__Proteobacteria;c__Gammaproteobacteria;o__Enterobacteriales;f__Enterobacteriaceae;	Bacteria	Proteobacteria	Gammaproteobacteria	Enterobacteriales	Enterobacteriaceae
neg.ctrl6_2382432	k__Bacteria;p__Proteobacteria;c__Gammaproteobacteria;o__Enterobacteriales;f__Enterobacteriaceae;	Bacteria	Proteobacteria	Gammaproteobacteria	Enterobacteriales	Enterobacteriaceae
neg.ctrl6_2406589	k__Bacteria;p__Proteobacteria;c__Gammaproteobacteria;o__Enterobacteriales;f__Enterobacteriaceae;	Bacteria	Proteobacteria	Gammaproteobacteria	Enterobacteriales	Enterobacteriaceae
neg.ctrl6_2487939	k__Bacteria;p__Proteobacteria;c__Gammaproteobacteria;o__Enterobacteriales;f__Enterobacteriaceae;	Bacteria	Proteobacteria	Gammaproteobacteria	Enterobacteriales	Enterobacteriaceae
neg.ctrl6_2902157	k__Bacteria;p__Proteobacteria;c__Gammaproteobacteria;o__Enterobacteriales;f__Enterobacteriaceae;	Bacteria	Proteobacteria	Gammaproteobacteria	Enterobacteriales	Enterobacteriaceae
neg.ctrl6_3158023	k__Bacteria;p__Proteobacteria;c__Gammaproteobacteria;o__Enterobacteriales;f__Enterobacteriaceae;	Bacteria	Proteobacteria	Gammaproteobacteria	Enterobacteriales	Enterobacteriaceae
neg.ctrl6_3965318	k__Bacteria;p__Proteobacteria;c__Gammaproteobacteria;o__Enterobacteriales;f__Enterobacteriaceae;	Bacteria	Proteobacteria	Gammaproteobacteria	Enterobacteriales	Enterobacteriaceae
empty3_1604612	k__Bacteria;p__Proteobacteria;c__Gammaproteobacteria;o__Legionellales;	Bacteria	Proteobacteria	Gammaproteobacteria	Legionellales
neg.ctrl_PCR_2_2561843	k__Bacteria;p__Proteobacteria;c__Gammaproteobacteria;o__Legionellales;	Bacteria	Proteobacteria	Gammaproteobacteria	Legionellales
neg.ctrl_PCR_2_2607772	k__Bacteria;p__Proteobacteria;c__Gammaproteobacteria;o__Legionellales;	Bacteria	Proteobacteria	Gammaproteobacteria	Legionellales
neg.ctrl_PCR_2_3358840	k__Bacteria;p__Proteobacteria;c__Gammaproteobacteria;o__Legionellales;	Bacteria	Proteobacteria	Gammaproteobacteria	Legionellales
neg.ctrl_PCR_2_3582906	k__Bacteria;p__Proteobacteria;c__Gammaproteobacteria;o__Legionellales;	Bacteria	Proteobacteria	Gammaproteobacteria	Legionellales
neg.ctrl_PCR_2_3609247	k__Bacteria;p__Proteobacteria;c__Gammaproteobacteria;o__Legionellales;	Bacteria	Proteobacteria	Gammaproteobacteria	Legionellales
neg.ctrl_PCR_3_4706515	k__Bacteria;p__Proteobacteria;c__Gammaproteobacteria;o__Legionellales;	Bacteria	Proteobacteria	Gammaproteobacteria	Legionellales
neg.ctrl_PCR_3_4964687	k__Bacteria;p__Proteobacteria;c__Gammaproteobacteria;o__Legionellales;	Bacteria	Proteobacteria	Gammaproteobacteria	Legionellales
neg.ctrl_PCR_3_5172270	k__Bacteria;p__Proteobacteria;c__Gammaproteobacteria;o__Legionellales;	Bacteria	Proteobacteria	Gammaproteobacteria	Legionellales
neg.ctrl_PCR_3_6486963	k__Bacteria;p__Proteobacteria;c__Gammaproteobacteria;o__Legionellales;	Bacteria	Proteobacteria	Gammaproteobacteria	Legionellales
neg.ctrl_PCR_3_7136364	k__Bacteria;p__Proteobacteria;c__Gammaproteobacteria;o__Legionellales;	Bacteria	Proteobacteria	Gammaproteobacteria	Legionellales
neg.ctrl_PCR_3_7456024	k__Bacteria;p__Proteobacteria;c__Gammaproteobacteria;o__Legionellales;	Bacteria	Proteobacteria	Gammaproteobacteria	Legionellales
neg.ctrl_PCR_3_7457773	k__Bacteria;p__Proteobacteria;c__Gammaproteobacteria;o__Legionellales;	Bacteria	Proteobacteria	Gammaproteobacteria	Legionellales
neg.ctrl_PCR_3_7665059	k__Bacteria;p__Proteobacteria;c__Gammaproteobacteria;o__Legionellales;	Bacteria	Proteobacteria	Gammaproteobacteria	Legionellales
neg.ctrl_PCR_4_10141347	k__Bacteria;p__Proteobacteria;c__Gammaproteobacteria;o__Legionellales;	Bacteria	Proteobacteria	Gammaproteobacteria	Legionellales
neg.ctrl_PCR_4_11574286	k__Bacteria;p__Proteobacteria;c__Gammaproteobacteria;o__Legionellales;	Bacteria	Proteobacteria	Gammaproteobacteria	Legionellales
neg.ctrl_PCR_4_11720609	k__Bacteria;p__Proteobacteria;c__Gammaproteobacteria;o__Legionellales;	Bacteria	Proteobacteria	Gammaproteobacteria	Legionellales
neg.ctrl_PCR_4_11782334	k__Bacteria;p__Proteobacteria;c__Gammaproteobacteria;o__Legionellales;	Bacteria	Proteobacteria	Gammaproteobacteria	Legionellales
neg.ctrl_PCR_4_12277003	k__Bacteria;p__Proteobacteria;c__Gammaproteobacteria;o__Legionellales;	Bacteria	Proteobacteria	Gammaproteobacteria	Legionellales
neg.ctrl_PCR_4_12525311	k__Bacteria;p__Proteobacteria;c__Gammaproteobacteria;o__Legionellales;	Bacteria	Proteobacteria	Gammaproteobacteria	Legionellales
neg.ctrl_PCR_4_12722340	k__Bacteria;p__Proteobacteria;c__Gammaproteobacteria;o__Legionellales;	Bacteria	Proteobacteria	Gammaproteobacteria	Legionellales
neg.ctrl_PCR_4_9307391	k__Bacteria;p__Proteobacteria;c__Gammaproteobacteria;o__Legionellales;	Bacteria	Proteobacteria	Gammaproteobacteria	Legionellales
neg.ctrl_PCR_4_9344412	k__Bacteria;p__Proteobacteria;c__Gammaproteobacteria;o__Legionellales;	Bacteria	Proteobacteria	Gammaproteobacteria	Legionellales
neg.ctrl_PCR_4_9436926	k__Bacteria;p__Proteobacteria;c__Gammaproteobacteria;o__Legionellales;	Bacteria	Proteobacteria	Gammaproteobacteria	Legionellales
neg.ctrl_PCR_5_10042520	k__Bacteria;p__Proteobacteria;c__Gammaproteobacteria;o__Legionellales;	Bacteria	Proteobacteria	Gammaproteobacteria	Legionellales
neg.ctrl_PCR_5_10743780	k__Bacteria;p__Proteobacteria;c__Gammaproteobacteria;o__Legionellales;	Bacteria	Proteobacteria	Gammaproteobacteria	Legionellales
neg.ctrl_PCR_5_11884969	k__Bacteria;p__Proteobacteria;c__Gammaproteobacteria;o__Legionellales;	Bacteria	Proteobacteria	Gammaproteobacteria	Legionellales
neg.ctrl_PCR_5_12815107	k__Bacteria;p__Proteobacteria;c__Gammaproteobacteria;o__Legionellales;	Bacteria	Proteobacteria	Gammaproteobacteria	Legionellales
neg.ctrl_PCR_5_13195033	k__Bacteria;p__Proteobacteria;c__Gammaproteobacteria;o__Legionellales;	Bacteria	Proteobacteria	Gammaproteobacteria	Legionellales
neg.ctrl_PCR_5_13531219	k__Bacteria;p__Proteobacteria;c__Gammaproteobacteria;o__Legionellales;	Bacteria	Proteobacteria	Gammaproteobacteria	Legionellales
neg.ctrl_PCR_5_14135466	k__Bacteria;p__Proteobacteria;c__Gammaproteobacteria;o__Legionellales;	Bacteria	Proteobacteria	Gammaproteobacteria	Legionellales
neg.ctrl1_3728239	k__Bacteria;p__Proteobacteria;c__Gammaproteobacteria;o__Legionellales;	Bacteria	Proteobacteria	Gammaproteobacteria	Legionellales
neg.ctrl1_3732329	k__Bacteria;p__Proteobacteria;c__Gammaproteobacteria;o__Legionellales;	Bacteria	Proteobacteria	Gammaproteobacteria	Legionellales
neg.ctrl1_3868012	k__Bacteria;p__Proteobacteria;c__Gammaproteobacteria;o__Legionellales;	Bacteria	Proteobacteria	Gammaproteobacteria	Legionellales
neg.ctrl1_4388220	k__Bacteria;p__Proteobacteria;c__Gammaproteobacteria;o__Legionellales;	Bacteria	Proteobacteria	Gammaproteobacteria	Legionellales
neg.ctrl5_5906839	k__Bacteria;p__Proteobacteria;c__Gammaproteobacteria;o__Legionellales;	Bacteria	Proteobacteria	Gammaproteobacteria	Legionellales
neg.ctrl5_6066903	k__Bacteria;p__Proteobacteria;c__Gammaproteobacteria;o__Legionellales;	Bacteria	Proteobacteria	Gammaproteobacteria	Legionellales
neg.ctrl7_3086501	k__Bacteria;p__Proteobacteria;c__Gammaproteobacteria;o__Legionellales;	Bacteria	Proteobacteria	Gammaproteobacteria	Legionellales
neg.ctrl7_3470633	k__Bacteria;p__Proteobacteria;c__Gammaproteobacteria;o__Legionellales;	Bacteria	Proteobacteria	Gammaproteobacteria	Legionellales
neg.ctrl7_3471385	k__Bacteria;p__Proteobacteria;c__Gammaproteobacteria;o__Pasteurellales;f__Pasteurellaceae;g__Haemophilus;s__parainfluenzae;	Bacteria	Proteobacteria	Gammaproteobacteria	Pasteurellales	Pasteurellaceae	Haemophilus	parainfluenzae
neg.ctrl_PCR_2_2542477	k__Bacteria;p__Proteobacteria;c__Gammaproteobacteria;o__Pseudomonadales;f__Moraxellaceae;g__Acinetobacter;s__schindleri;	Bacteria	Proteobacteria	Gammaproteobacteria	Pseudomonadales	Moraxellaceae	Acinetobacter	schindleri
neg.ctrl_PCR_2_2949034	k__Bacteria;p__Proteobacteria;c__Gammaproteobacteria;o__Pseudomonadales;f__Moraxellaceae;g__Acinetobacter;s__schindleri;	Bacteria	Proteobacteria	Gammaproteobacteria	Pseudomonadales	Moraxellaceae	Acinetobacter	schindleri
neg.ctrl_PCR_2_3968913	k__Bacteria;p__Proteobacteria;c__Gammaproteobacteria;o__Pseudomonadales;f__Moraxellaceae;g__Acinetobacter;s__schindleri;	Bacteria	Proteobacteria	Gammaproteobacteria	Pseudomonadales	Moraxellaceae	Acinetobacter	schindleri
neg.ctrl_PCR_2_4226623	k__Bacteria;p__Proteobacteria;c__Gammaproteobacteria;o__Pseudomonadales;f__Moraxellaceae;g__Acinetobacter;s__schindleri;	Bacteria	Proteobacteria	Gammaproteobacteria	Pseudomonadales	Moraxellaceae	Acinetobacter	schindleri
neg.ctrl6_4132992	k__Bacteria;p__Proteobacteria;c__Gammaproteobacteria;o__Pseudomonadales;f__Moraxellaceae;g__Acinetobacter;	Bacteria	Proteobacteria	Gammaproteobacteria	Pseudomonadales	Moraxellaceae	Acinetobacter
empty3_1801070	k__Bacteria;p__Proteobacteria;c__Gammaproteobacteria;o__Pseudomonadales;f__Moraxellaceae;g__Enhydrobacter;	Bacteria	Proteobacteria	Gammaproteobacteria	Pseudomonadales	Moraxellaceae	Enhydrobacter
neg.ctrl1_3599878	k__Bacteria;p__Proteobacteria;c__Gammaproteobacteria;o__Pseudomonadales;f__Moraxellaceae;g__Enhydrobacter;	Bacteria	Proteobacteria	Gammaproteobacteria	Pseudomonadales	Moraxellaceae	Enhydrobacter
neg.ctrl_PCR_2_2806964	k__Bacteria;p__Proteobacteria;c__Gammaproteobacteria;o__Pseudomonadales;f__Moraxellaceae;g__Perlucidibaca;	Bacteria	Proteobacteria	Gammaproteobacteria	Pseudomonadales	Moraxellaceae	Perlucidibaca
neg.ctrl_PCR_2_3496877	k__Bacteria;p__Proteobacteria;c__Gammaproteobacteria;o__Pseudomonadales;f__Moraxellaceae;g__Perlucidibaca;	Bacteria	Proteobacteria	Gammaproteobacteria	Pseudomonadales	Moraxellaceae	Perlucidibaca
neg.ctrl_PCR_2_4122452	k__Bacteria;p__Proteobacteria;c__Gammaproteobacteria;o__Pseudomonadales;f__Moraxellaceae;g__Perlucidibaca;	Bacteria	Proteobacteria	Gammaproteobacteria	Pseudomonadales	Moraxellaceae	Perlucidibaca
neg.ctrl_PCR_2_4442100	k__Bacteria;p__Proteobacteria;c__Gammaproteobacteria;o__Pseudomonadales;f__Moraxellaceae;g__Perlucidibaca;	Bacteria	Proteobacteria	Gammaproteobacteria	Pseudomonadales	Moraxellaceae	Perlucidibaca
empty1_2363196	k__Bacteria;p__Proteobacteria;c__Gammaproteobacteria;o__Pseudomonadales;f__Pseudomonadaceae;g__Pseudomonas;	Bacteria	Proteobacteria	Gammaproteobacteria	Pseudomonadales	Pseudomonadaceae	Pseudomonas
empty3_1244707	k__Bacteria;p__Proteobacteria;c__Gammaproteobacteria;o__Pseudomonadales;f__Pseudomonadaceae;g__Pseudomonas;	Bacteria	Proteobacteria	Gammaproteobacteria	Pseudomonadales	Pseudomonadaceae	Pseudomonas
empty3_1265960	k__Bacteria;p__Proteobacteria;c__Gammaproteobacteria;o__Pseudomonadales;f__Pseudomonadaceae;g__Pseudomonas;	Bacteria	Proteobacteria	Gammaproteobacteria	Pseudomonadales	Pseudomonadaceae	Pseudomonas
empty3_1287654	k__Bacteria;p__Proteobacteria;c__Gammaproteobacteria;o__Pseudomonadales;f__Pseudomonadaceae;g__Pseudomonas;	Bacteria	Proteobacteria	Gammaproteobacteria	Pseudomonadales	Pseudomonadaceae	Pseudomonas
empty3_1409076	k__Bacteria;p__Proteobacteria;c__Gammaproteobacteria;o__Pseudomonadales;f__Pseudomonadaceae;g__Pseudomonas;s__viridiflava;	Bacteria	Proteobacteria	Gammaproteobacteria	Pseudomonadales	Pseudomonadaceae	Pseudomonas	viridiflava
empty3_1413821	k__Bacteria;p__Proteobacteria;c__Gammaproteobacteria;o__Pseudomonadales;f__Pseudomonadaceae;g__Pseudomonas;	Bacteria	Proteobacteria	Gammaproteobacteria	Pseudomonadales	Pseudomonadaceae	Pseudomonas
empty3_1486040	k__Bacteria;p__Proteobacteria;c__Gammaproteobacteria;o__Pseudomonadales;f__Pseudomonadaceae;g__Pseudomonas;	Bacteria	Proteobacteria	Gammaproteobacteria	Pseudomonadales	Pseudomonadaceae	Pseudomonas
empty3_1573065	k__Bacteria;p__Proteobacteria;c__Gammaproteobacteria;o__Pseudomonadales;f__Pseudomonadaceae;g__Pseudomonas;	Bacteria	Proteobacteria	Gammaproteobacteria	Pseudomonadales	Pseudomonadaceae	Pseudomonas
empty3_1836289	k__Bacteria;p__Proteobacteria;c__Gammaproteobacteria;o__Pseudomonadales;f__Pseudomonadaceae;g__Pseudomonas;	Bacteria	Proteobacteria	Gammaproteobacteria	Pseudomonadales	Pseudomonadaceae	Pseudomonas
empty3_1968280	k__Bacteria;p__Proteobacteria;c__Gammaproteobacteria;o__Pseudomonadales;f__Pseudomonadaceae;g__Pseudomonas;s__veronii;	Bacteria	Proteobacteria	Gammaproteobacteria	Pseudomonadales	Pseudomonadaceae	Pseudomonas	veronii
neg.ctrl_PCR_3_4637930	k__Bacteria;p__Proteobacteria;c__Gammaproteobacteria;o__Pseudomonadales;f__Pseudomonadaceae;g__Pseudomonas;	Bacteria	Proteobacteria	Gammaproteobacteria	Pseudomonadales	Pseudomonadaceae	Pseudomonas
neg.ctrl_PCR_3_4949998	k__Bacteria;p__Proteobacteria;c__Gammaproteobacteria;o__Pseudomonadales;f__Pseudomonadaceae;g__Pseudomonas;	Bacteria	Proteobacteria	Gammaproteobacteria	Pseudomonadales	Pseudomonadaceae	Pseudomonas
neg.ctrl_PCR_3_7707431	k__Bacteria;p__Proteobacteria;c__Gammaproteobacteria;o__Pseudomonadales;f__Pseudomonadaceae;g__Pseudomonas;	Bacteria	Proteobacteria	Gammaproteobacteria	Pseudomonadales	Pseudomonadaceae	Pseudomonas
neg.ctrl_PCR_4_10262946	k__Bacteria;p__Proteobacteria;c__Gammaproteobacteria;o__Pseudomonadales;f__Pseudomonadaceae;g__Pseudomonas;	Bacteria	Proteobacteria	Gammaproteobacteria	Pseudomonadales	Pseudomonadaceae	Pseudomonas
neg.ctrl_PCR_4_10792331	k__Bacteria;p__Proteobacteria;c__Gammaproteobacteria;o__Pseudomonadales;f__Pseudomonadaceae;g__Pseudomonas;	Bacteria	Proteobacteria	Gammaproteobacteria	Pseudomonadales	Pseudomonadaceae	Pseudomonas
neg.ctrl_PCR_4_11012075	k__Bacteria;p__Proteobacteria;c__Gammaproteobacteria;o__Pseudomonadales;f__Pseudomonadaceae;g__Pseudomonas;	Bacteria	Proteobacteria	Gammaproteobacteria	Pseudomonadales	Pseudomonadaceae	Pseudomonas
neg.ctrl_PCR_4_11396455	k__Bacteria;p__Proteobacteria;c__Gammaproteobacteria;o__Pseudomonadales;f__Pseudomonadaceae;g__Pseudomonas;	Bacteria	Proteobacteria	Gammaproteobacteria	Pseudomonadales	Pseudomonadaceae	Pseudomonas
neg.ctrl_PCR_4_12125043	k__Bacteria;p__Proteobacteria;c__Gammaproteobacteria;o__Pseudomonadales;f__Pseudomonadaceae;g__Pseudomonas;	Bacteria	Proteobacteria	Gammaproteobacteria	Pseudomonadales	Pseudomonadaceae	Pseudomonas
neg.ctrl_PCR_4_12199760	k__Bacteria;p__Proteobacteria;c__Gammaproteobacteria;o__Pseudomonadales;f__Pseudomonadaceae;g__Pseudomonas;	Bacteria	Proteobacteria	Gammaproteobacteria	Pseudomonadales	Pseudomonadaceae	Pseudomonas
neg.ctrl_PCR_4_12271317	k__Bacteria;p__Proteobacteria;c__Gammaproteobacteria;o__Pseudomonadales;f__Pseudomonadaceae;g__Pseudomonas;	Bacteria	Proteobacteria	Gammaproteobacteria	Pseudomonadales	Pseudomonadaceae	Pseudomonas
neg.ctrl_PCR_4_12735444	k__Bacteria;p__Proteobacteria;c__Gammaproteobacteria;o__Pseudomonadales;f__Pseudomonadaceae;g__Pseudomonas;	Bacteria	Proteobacteria	Gammaproteobacteria	Pseudomonadales	Pseudomonadaceae	Pseudomonas
neg.ctrl_PCR_4_12794670	k__Bacteria;p__Proteobacteria;c__Gammaproteobacteria;o__Pseudomonadales;f__Pseudomonadaceae;g__Pseudomonas;	Bacteria	Proteobacteria	Gammaproteobacteria	Pseudomonadales	Pseudomonadaceae	Pseudomonas
neg.ctrl_PCR_4_12847949	k__Bacteria;p__Proteobacteria;c__Gammaproteobacteria;o__Pseudomonadales;f__Pseudomonadaceae;g__Pseudomonas;	Bacteria	Proteobacteria	Gammaproteobacteria	Pseudomonadales	Pseudomonadaceae	Pseudomonas
neg.ctrl_PCR_4_12888893	k__Bacteria;p__Proteobacteria;c__Gammaproteobacteria;o__Pseudomonadales;f__Pseudomonadaceae;g__Pseudomonas;	Bacteria	Proteobacteria	Gammaproteobacteria	Pseudomonadales	Pseudomonadaceae	Pseudomonas
neg.ctrl_PCR_4_7661983	k__Bacteria;p__Proteobacteria;c__Gammaproteobacteria;o__Pseudomonadales;f__Pseudomonadaceae;g__Pseudomonas;	Bacteria	Proteobacteria	Gammaproteobacteria	Pseudomonadales	Pseudomonadaceae	Pseudomonas
neg.ctrl_PCR_4_7756382	k__Bacteria;p__Proteobacteria;c__Gammaproteobacteria;o__Pseudomonadales;f__Pseudomonadaceae;g__Pseudomonas;	Bacteria	Proteobacteria	Gammaproteobacteria	Pseudomonadales	Pseudomonadaceae	Pseudomonas
neg.ctrl_PCR_4_7826566	k__Bacteria;p__Proteobacteria;c__Gammaproteobacteria;o__Pseudomonadales;f__Pseudomonadaceae;g__Pseudomonas;	Bacteria	Proteobacteria	Gammaproteobacteria	Pseudomonadales	Pseudomonadaceae	Pseudomonas
neg.ctrl_PCR_4_7835285	k__Bacteria;p__Proteobacteria;c__Gammaproteobacteria;o__Pseudomonadales;f__Pseudomonadaceae;g__Pseudomonas;	Bacteria	Proteobacteria	Gammaproteobacteria	Pseudomonadales	Pseudomonadaceae	Pseudomonas
neg.ctrl_PCR_4_8031758	k__Bacteria;p__Proteobacteria;c__Gammaproteobacteria;o__Pseudomonadales;f__Pseudomonadaceae;g__Pseudomonas;	Bacteria	Proteobacteria	Gammaproteobacteria	Pseudomonadales	Pseudomonadaceae	Pseudomonas
neg.ctrl_PCR_4_8671659	k__Bacteria;p__Proteobacteria;c__Gammaproteobacteria;o__Pseudomonadales;f__Pseudomonadaceae;g__Pseudomonas;	Bacteria	Proteobacteria	Gammaproteobacteria	Pseudomonadales	Pseudomonadaceae	Pseudomonas
neg.ctrl_PCR_4_8765168	k__Bacteria;p__Proteobacteria;c__Gammaproteobacteria;o__Pseudomonadales;f__Pseudomonadaceae;g__Pseudomonas;	Bacteria	Proteobacteria	Gammaproteobacteria	Pseudomonadales	Pseudomonadaceae	Pseudomonas
neg.ctrl_PCR_4_8888445	k__Bacteria;p__Proteobacteria;c__Gammaproteobacteria;o__Pseudomonadales;f__Pseudomonadaceae;g__Pseudomonas;	Bacteria	Proteobacteria	Gammaproteobacteria	Pseudomonadales	Pseudomonadaceae	Pseudomonas
neg.ctrl_PCR_4_8938516	k__Bacteria;p__Proteobacteria;c__Gammaproteobacteria;o__Pseudomonadales;f__Pseudomonadaceae;g__Pseudomonas;	Bacteria	Proteobacteria	Gammaproteobacteria	Pseudomonadales	Pseudomonadaceae	Pseudomonas
neg.ctrl_PCR_4_9112526	k__Bacteria;p__Proteobacteria;c__Gammaproteobacteria;o__Pseudomonadales;f__Pseudomonadaceae;g__Pseudomonas;	Bacteria	Proteobacteria	Gammaproteobacteria	Pseudomonadales	Pseudomonadaceae	Pseudomonas
neg.ctrl_PCR_4_9217261	k__Bacteria;p__Proteobacteria;c__Gammaproteobacteria;o__Pseudomonadales;f__Pseudomonadaceae;g__Pseudomonas;	Bacteria	Proteobacteria	Gammaproteobacteria	Pseudomonadales	Pseudomonadaceae	Pseudomonas
neg.ctrl_PCR_4_9301480	k__Bacteria;p__Proteobacteria;c__Gammaproteobacteria;o__Pseudomonadales;f__Pseudomonadaceae;g__Pseudomonas;	Bacteria	Proteobacteria	Gammaproteobacteria	Pseudomonadales	Pseudomonadaceae	Pseudomonas
neg.ctrl1_3217960	k__Bacteria;p__Proteobacteria;c__Gammaproteobacteria;o__Pseudomonadales;f__Pseudomonadaceae;g__Pseudomonas;	Bacteria	Proteobacteria	Gammaproteobacteria	Pseudomonadales	Pseudomonadaceae	Pseudomonas
neg.ctrl1_3343364	k__Bacteria;p__Proteobacteria;c__Gammaproteobacteria;o__Pseudomonadales;f__Pseudomonadaceae;g__Pseudomonas;	Bacteria	Proteobacteria	Gammaproteobacteria	Pseudomonadales	Pseudomonadaceae	Pseudomonas
neg.ctrl5_4379419	k__Bacteria;p__Proteobacteria;c__Gammaproteobacteria;o__Pseudomonadales;f__Pseudomonadaceae;g__Pseudomonas;s__stutzeri;	Bacteria	Proteobacteria	Gammaproteobacteria	Pseudomonadales	Pseudomonadaceae	Pseudomonas	stutzeri
neg.ctrl5_4448448	k__Bacteria;p__Proteobacteria;c__Gammaproteobacteria;o__Pseudomonadales;f__Pseudomonadaceae;g__Pseudomonas;s__stutzeri;	Bacteria	Proteobacteria	Gammaproteobacteria	Pseudomonadales	Pseudomonadaceae	Pseudomonas	stutzeri
neg.ctrl5_5091959	k__Bacteria;p__Proteobacteria;c__Gammaproteobacteria;o__Pseudomonadales;f__Pseudomonadaceae;g__Pseudomonas;s__stutzeri;	Bacteria	Proteobacteria	Gammaproteobacteria	Pseudomonadales	Pseudomonadaceae	Pseudomonas	stutzeri
neg.ctrl5_7384068	k__Bacteria;p__Proteobacteria;c__Gammaproteobacteria;o__Pseudomonadales;f__Pseudomonadaceae;g__Pseudomonas;s__stutzeri;	Bacteria	Proteobacteria	Gammaproteobacteria	Pseudomonadales	Pseudomonadaceae	Pseudomonas	stutzeri
neg.ctrl5_7414730	k__Bacteria;p__Proteobacteria;c__Gammaproteobacteria;o__Pseudomonadales;f__Pseudomonadaceae;g__Pseudomonas;s__stutzeri;	Bacteria	Proteobacteria	Gammaproteobacteria	Pseudomonadales	Pseudomonadaceae	Pseudomonas	stutzeri
neg.ctrl6_3159993	k__Bacteria;p__Proteobacteria;c__Gammaproteobacteria;o__Pseudomonadales;f__Pseudomonadaceae;g__Pseudomonas;	Bacteria	Proteobacteria	Gammaproteobacteria	Pseudomonadales	Pseudomonadaceae	Pseudomonas
neg.ctrl_PCR_4_10647765	k__Bacteria;p__Proteobacteria;c__Gammaproteobacteria;o__Xanthomonadales;f__Sinobacteraceae;	Bacteria	Proteobacteria	Gammaproteobacteria	Xanthomonadales	Sinobacteraceae
neg.ctrl_PCR_4_11156469	k__Bacteria;p__Proteobacteria;c__Gammaproteobacteria;o__Xanthomonadales;f__Sinobacteraceae;	Bacteria	Proteobacteria	Gammaproteobacteria	Xanthomonadales	Sinobacteraceae
neg.ctrl_PCR_4_12026343	k__Bacteria;p__Proteobacteria;c__Gammaproteobacteria;o__Xanthomonadales;f__Sinobacteraceae;	Bacteria	Proteobacteria	Gammaproteobacteria	Xanthomonadales	Sinobacteraceae
neg.ctrl_PCR_4_12690801	k__Bacteria;p__Proteobacteria;c__Gammaproteobacteria;o__Xanthomonadales;f__Sinobacteraceae;	Bacteria	Proteobacteria	Gammaproteobacteria	Xanthomonadales	Sinobacteraceae
neg.ctrl_PCR_4_7652623	k__Bacteria;p__Proteobacteria;c__Gammaproteobacteria;o__Xanthomonadales;f__Sinobacteraceae;	Bacteria	Proteobacteria	Gammaproteobacteria	Xanthomonadales	Sinobacteraceae
neg.ctrl_PCR_4_7725834	k__Bacteria;p__Proteobacteria;c__Gammaproteobacteria;o__Xanthomonadales;f__Sinobacteraceae;	Bacteria	Proteobacteria	Gammaproteobacteria	Xanthomonadales	Sinobacteraceae
empty1_1192326	k__Bacteria;p__Proteobacteria;c__Gammaproteobacteria;o__Xanthomonadales;f__Xanthomonadaceae;g__Stenotrophomonas;	Bacteria	Proteobacteria	Gammaproteobacteria	Xanthomonadales	Xanthomonadaceae	Stenotrophomonas
neg.ctrl1_3387390	k__Bacteria;p__Proteobacteria;c__Gammaproteobacteria;o__Xanthomonadales;f__Xanthomonadaceae;g__Stenotrophomonas;	Bacteria	Proteobacteria	Gammaproteobacteria	Xanthomonadales	Xanthomonadaceae	Stenotrophomonas
neg.ctrl1_4223288	k__Bacteria;p__Proteobacteria;c__Gammaproteobacteria;o__Xanthomonadales;f__Xanthomonadaceae;g__Stenotrophomonas;	Bacteria	Proteobacteria	Gammaproteobacteria	Xanthomonadales	Xanthomonadaceae	Stenotrophomonas
neg.ctrl7_2231327	k__Bacteria;p__Proteobacteria;c__Gammaproteobacteria;o__Xanthomonadales;f__Xanthomonadaceae;g__Stenotrophomonas;	Bacteria	Proteobacteria	Gammaproteobacteria	Xanthomonadales	Xanthomonadaceae	Stenotrophomonas
neg.ctrl7_2618530	k__Bacteria;p__Proteobacteria;c__Gammaproteobacteria;o__Xanthomonadales;f__Xanthomonadaceae;g__Stenotrophomonas;	Bacteria	Proteobacteria	Gammaproteobacteria	Xanthomonadales	Xanthomonadaceae	Stenotrophomonas
neg.ctrl7_2581331	k__Bacteria;p__Proteobacteria;c__Gammaproteobacteria;o__Xanthomonadales;f__Xanthomonadaceae;	Bacteria	Proteobacteria	Gammaproteobacteria	Xanthomonadales	Xanthomonadaceae
neg.ctrl7_3439034	k__Bacteria;p__Proteobacteria;c__Gammaproteobacteria;o__Xanthomonadales;f__Xanthomonadaceae;	Bacteria	Proteobacteria	Gammaproteobacteria	Xanthomonadales	Xanthomonadaceae
empty3_2204623	k__Bacteria;p__TM7;c__TM7-3;o__EW055;	Bacteria	TM7	TM7-3	EW055

## Sheet: Taxonomy_sum
S3_Table				known contaminant
Taxonomy					Number of sequences
Phylum	Class	Order	Family	Genus	Sterile swabs (207)	DNA extraction (173)	PCR reagents (480)
[Thermi]	Deinococci	Deinococcales	Deinococcaceae	Deinococcus	4	0	0
Actinobacteria	Actinobacteria	Actinomycetales	Corynebacteriaceae	Corynebacterium	0	10	9
			Dermabacteraceae	Unclassified	1	6	18
			Geodermatophilaceae	Blastococcus	1	0	0
			Intrasporangiaceae	Unclassified	0	1	0
			Microbacteriaceae	Clavibacter	1	0	0
				Frigoribacterium	3	0	0
				Microbacterium	0	0	2
				Pseudoclavibacter	2	0	5
				Unclassified	2	0	0
			Micrococcaceae	Micrococcus	0	2	0
			Mycobacteriaceae	Mycobacterium	0	8	0
			Nocardiaceae	Rhodococcus	3	2	21
			Nocardioidaceae	Unclassified	1	0	0
			Propionibacteriaceae	Propionibacterium	0	1	1
		Bifidobacteriales	Bifidobacteriaceae	Bifidobacterium	0	2	0
	Coriobacteriia	Coriobacteriales	Coriobacteriaceae	Atopobium	6	0	0
	Thermoleophilia	Solirubrobacterales	Unclassified	Unclassified	0	1	0
Armatimonadetes	[Fimbriimonadia]	[Fimbriimonadales]	[Fimbriimonadaceae]	Unclassified	0	10	25
Bacteroidetes	[Saprospirae]	[Saprospirales]	Chitinophagaceae	Sediminibacterium	2	2	23
	Bacteroidia	Bacteroidales	Bacteroidaceae	Bacteroides	3	0	0
			Porphyromonadaceae	Parabacteroides	0	2	0
				Porphyromonas	1	0	0
			Prevotellaceae	Prevotella	3	2	0
			S24-7	Unclassified	1	0	0
	Cytophagia	Cytophagales	Cytophagaceae	Dyadobacter	1	0	0
	Flavobacteriia	Flavobacteriales	[Weeksellaceae]	Chryseobacterium	0	4	0
				Wautersiella	0	0	2
			Flavobacteriaceae	Flavobacterium	37	0	0
	Sphingobacteriia	Sphingobacteriales	Sphingobacteriaceae	Pedobacter	5	0	0
Chloroflexi	Chloroflexi	[Roseiflexales]	[Kouleothrixaceae]	Unclassified	5	0	0
Cyanobacteria	Chloroplast	Streptophyta	Unclassified	Unclassified	0	1	21
Firmicutes	Bacilli	Bacillales	Bacillaceae	Bacillus	0	1	0
				Unclassified	0	0	1
			Paenibacillaceae	Paenibacillus	1	0	0
			Planococcaceae	Unclassified	0	1	0
			Staphylococcaceae	Staphylococcus	0	7	0
			Thermoactinomycetaceae		1	0	0
		Lactobacillales	Aerococcaceae	Aerococcus	0	1	13
			Enterococcaceae	Enterococcus	19	1	0
			Streptococcaceae	Streptococcus	2	1	0
		Unclassified	Unclassified	Unclassified	0	0	1
	Clostridia	Clostridiales	[Tissierellaceae]	Anaerococcus	1	0	0
				Finegoldia	1	0	0
				Peptoniphilus	1	0	0
			Clostridiaceae	Clostridium	2	0	0
			Lachnospiraceae	Blautia	1	0	0
				Dorea	1	0	0
				Roseburia	0	7	0
				Unclassified	12	2	5
			Ruminococcaceae	Oscillospira	0	1	0
				Ruminococcus	5	6	0
				Unclassified	0	4	0
			Unclassified	Unclassified	1	0	0
			Veillonellaceae	Acidaminococcus	4	0	0
				Dialister	3	0	0
				Veillonella	0	1	0
	Erysipelotrichi	Erysipelotrichales	Erysipelotrichaceae	[Eubacterium]	0	1	0
				Bulleidia	2	0	0
Proteobacteria	Alphaproteobacteria	Caulobacterales	Caulobacteraceae	Brevundimonas	0	0	2
				Unclassified	1	2	27
		Rhizobiales	Bradyrhizobiaceae	Afipia	0	1	15
			Brucellaceae	Ochrobactrum	0	1	26
			Hyphomicrobiaceae	Hyphomicrobium	0	1	0
			Methylobacteriaceae	Methylobacterium	1	7	44
				Unclassified	0	1	0
			Rhizobiaceae	Agrobacterium	12	0	0
				Unclassified	7	0	0
		Rhodobacterales	Rhodobacteraceae	Paracoccus	5	0	0
				Unclassified	3	0	0
		Sphingomonadales	Sphingomonadaceae	Kaistobacter	2	0	0
				Sphingomonas	2	2	7
				Unclassified	0	0	1
	Betaproteobacteria	Burkholderiales	Alcaligenaceae	Achromobacter	0	3	0
				Sutterella	0	1	0
				Unclassified	0	0	8
			Comamonadaceae	Curvibacter	0	0	1
				Delftia	0	0	13
				Schlegelella	2	9	0
				Tepidimonas	0	5	0
				Unclassified	5	10	115
			Oxalobacteraceae	Janthinobacterium	3	0	0
				Unclassified	1	0	4
		Methylophilales	Methylophilaceae	Methylotenera	1	0	0
		Rhodocyclales	Rhodocyclaceae	Hydrogenophilus	0	6	0
	Deltaproteobacteria	Unclassified	Unclassified	Unclassified	2	0	0
	Gammaproteobacteria	Aeromonadales	Aeromonadaceae	Unclassified	1	0	0
		Enterobacteriales	Enterobacteriaceae	Salmonella	6	0	0
				Unclassified	0	11	0
		Legionellales	Unclassified	Unclassified	1	8	30
		Pasteurellales	Pasteurellaceae	Haemophilus	0	1	0
		Pseudomonadales	Moraxellaceae	Acinetobacter	0	1	4
				Enhydrobacter	1	1	0
				Perlucidibaca	0	0	4
			Pseudomonadaceae	Pseudomonas	10	8	26
		Xanthomonadales	Sinobacteraceae	Unclassified	0	0	6
			Xanthomonadaceae	Stenotrophomonas	1	4	0
				Unclassified	0	2	0
TM7	TM7-3	EW055	Unclassified	Unclassified	1	0	0
