# Supplementary material for: Usability of rectal swabs for microbiome sampling in a cohort study of hematological and oncological patients
Source: PLoS One. 2019 Apr 15;14(4):e0215428. doi: 10.1371/journal.pone.0215428 (PMC6464231; doi:10.1371/journal.pone.0215428)
Supplement: S4 Table — (XLSX) [file pone.0215428.s008.xlsx]

## Sheet: Swab_Sum
S4 Table
Sample-ID	gDNA PicoGreen concentration (ng/µl)	Total amount of gDNA (ng)	Number of sequenced reads	Number of sequences in OTU table	Included in further analyses
01-000-1	1.932	96.6	170624	114694	yes		Statistics
01-021-1	0.953	47.65	26107	15116	yes			gDNA	Sequences
02-000-1	109.85	5492.5	16620	9532	yes		Minimum	-0.228	11
02-007-1	90.556	4527.8	65659	62291	yes		Maximum	109.85	279263
02-015-1	51.468	2573.4	57519	55704	yes		Average	7.42088	85105.6
02-023-1	70.458	3522.9	39712	37084	yes		Median	3.169	65519
02-029-1	11.434	571.7	41440	39372	yes
02-035-1	12.945	647.25	57064	54679	yes		n.a.: not applicable
03-000-1	5.791	289.55	60685	40335	yes
03-007-1	6.908	345.4	38965	31186	yes
03-015-1	9.835	491.75	40127	23797	yes
03-020-1	10.077	503.85	15332	9249	yes
03-028-1	10.245	512.25	168285	108686	yes
03-057-1	9.014	450.7	48701	29070	yes
03-062-1	8.469	423.45	54798	42129	yes
03-069-1	0.762	38.1	36616	32199	yes
03-090-1	7.017	350.85	39156	34443	yes
03-096-1	0.419	20.95	28281	25751	yes
03-100-1	2.897	144.85	55799	53774	yes
03-117-1	2.047	102.35	79253	73499	yes
03-124-1	0.861	43.05	77108	76143	yes
03-131-1	3.528	176.4	65478	65184	yes
04-000-1	5.103	255.15	18372	12565	yes
04-005-1	10.405	520.25	42903	26446	yes
04-012-1	3.263	163.15	71949	57656	yes
04-019-1	11.388	569.4	24159	20448	yes
04-026-1	6.808	340.4	38893	30125	yes
04-032-1	11.788	589.4	54646	47127	yes
04-041-1	4.439	221.95	41088	24267	yes
04-046-1	3.784	189.2	45116	43232	yes
04-053-1	3.876	193.8	122598	110068	yes
04-060-1	0.858	42.9	28950	27973	yes
04-088-1	13.8	690	47318	34963	yes
04-096-1	14.09	704.5	35481	31006	yes
04-104-1	4.131	206.55	67791	44379	yes
04-110-1	3.916	195.8	64295	59310	yes
04-117-1	2.338	116.9	56630	54203	yes
04-181-1	7.758	387.9	152093	102391	yes
04-186-1	-0.228	n.a.	5731	4651	yes
05-000-1	3.986	199.3	27019	26007	yes
05-007-1	9.843	492.15	54236	53406	yes
05-014-1	3.327	166.35	26131	24215	yes
05-052-1	16.552	827.6	36455	34821	yes
05-079-1	8.336	416.8	24933	18232	yes
05-084-1	6.358	317.9	44400	31531	yes
05-093-1	3.62	181	31875	29323	yes
05-098-1	1.878	93.9	41304	31890	yes
05-122-1	0.5	25	74671	53098	yes
05-128-1	15.835	791.75	78544	46663	yes
05-141-1	41.286	2064.3	134046	89231	yes
05-164-1	8.806	440.3	104686	73872	yes
05-168-1	15.3	765	110918	82121	yes
05-227-1	9.629	481.45	133437	91131	yes
05-246-1	38.907	1945.35	160782	112785	yes
06-000-1	2.363	118.15	30555	19721	yes
06-007-1	3.227	161.35	148727	135255	yes
06-044-1	3.623	181.15	55143	49852	yes
06-050-1	0.843	42.15	59911	43967	yes
07-000-1	0.468	23.4	51720	48956	yes
07-007-1	4.274	213.7	59854	57272	yes
07-014-1	4.897	244.85	45246	38697	yes
07-021-1	13.847	692.35	48850	41381	yes
07-036-1	7.198	359.9	37098	28907	yes
07-042-1	3.047	152.35	48068	40403	yes
07-048-1	4.087	204.35	40704	36245	yes
07-056-1	14.705	735.25	34381	25659	yes
07-075-1	5.172	258.6	35907	24539	yes
07-080-1	7.752	387.6	47864	31725	yes
07-085-1	9.469	473.45	68724	42615	yes
07-089-1	4.973	248.65	45320	40316	yes
07-093-1	18.345	917.25	35279	23581	yes
07-119-1	5.654	282.7	77935	60040	yes
07-128-1	2.165	108.25	80252	64161	yes
07-133-1	13.673	683.65	72434	54724	yes
07-141-1	7.791	389.55	54165	46073	yes
07-148-1	10.858	542.9	206287	187767	yes
07-154-1	7.945	397.25	173518	135164	yes
07-161-1	26.147	1307.35	96299	81564	yes
07-176-1	11.775	588.75	98914	77652	yes
07-183-1	0.928	46.4	107242	97736	yes
07-192-1	2.04	102	131154	91671	yes
07-198-1	21.864	1093.2	262933	249254	yes
07-204-1	2.344	117.2	190745	160532	yes
07-211-1	3.157	157.85	188351	167156	yes
07-221-1	1.121	56.05	192888	175214	yes
07-226-1	1.081	54.05	199436	164020	yes
07-232-1	1.817	90.85	213480	181837	yes
07-239-1	5.337	266.85	211343	172857	yes
08-000-1	15.291	764.55	39695	29476	yes
08-056-1	4.64	232	39917	32521	yes
08-063-1	7.111	355.55	28834	23846	yes
08-069-1	1.802	90.1	31362	30061	yes
08-097-1	21.595	1079.75	44606	39132	yes
10-000-1	0.199	9.95	50119	36828	yes
10-005-1	2.645	132.25	117	n.a.	no
10-012-1	1.533	76.65	209311	196714	yes
10-019-1	1.786	89.3	3710	3319	yes
11-000-1	12.344	617.2	34460	21727	yes
11-004-1	9.725	486.25	34324	23952	yes
11-009-1	1.221	61.05	54674	33459	yes
11-016-1	3.568	178.4	42027	30605	yes
11-021-1	5.675	283.75	50530	39683	yes
11-039-1	2.351	117.55	53686	30828	yes
11-043-1	3.114	155.7	34753	25311	yes
11-050-1	1.356	67.8	51823	40979	yes
11-071-1	41.349	2067.45	38508	21065	yes
11-079-1	2.082	104.1	43085	35045	yes
11-084-1	12.871	643.55	50376	33513	yes
11-091-1	2.34	117	87548	51679	yes
11-109-1	14.209	710.45	64693	41047	yes
11-116-1	1.527	76.35	87179	60726	yes
12-000-1	2.761	138.05	37523	23181	yes
12-006-1	3.238	161.9	36362	32777	yes
12-013-1	5.622	281.1	35254	26440	yes
12-057-1	1.255	62.75	60538	36048	yes
12-062-1	0.468	23.4	28696	22308	yes
12-065-1	2.079	103.95	27092	22364	yes
12-070-1	0.212	10.6	29571	26601	yes
12-077-1	5.888	294.4	26610	25918	yes
13-000-1	5.085	254.25	59764	59493	yes
14-000-1	19.383	969.15	17863	10701	yes
14-005-1	1.607	80.35	48946	25388	yes
14-011-1	2.042	102.1	53248	41186	yes
14-018-1	1.53	76.5	45676	43628	yes
14-027-1	4.472	223.6	40789	37275	yes
14-032-1	7.478	373.9	36851	32395	yes
14-045-1	4.754	237.7	45478	44854	yes
14-049-1	1.788	89.4	34198	33553	yes
14-055-1	6.116	305.8	90335	82810	yes
14-060-1	1.07	53.5	60971	54600	yes
14-067-1	3.264	163.2	49523	43279	yes
14-075-1	6.61	330.5	102952	63522	yes
14-081-1	2.723	136.15	74055	59147	yes
14-091-1	8.38	419	89742	55669	yes
14-096-1	3.138	156.9	60756	54815	yes
14-102-1	7.448	372.4	137416	83255	yes
14-108-1	0.855	42.75	94993	61727	yes
14-117-1	6.845	342.25	85050	71165	yes
14-122-1	4.457	222.85	92593	56900	yes
14-139-1	-0.107	n.a.	165605	143918	yes
14-143-1	0.306	15.3	126430	103629	yes
14-151-1	-0.154	n.a.	130375	128353	yes
14-154-1	1.753	87.65	142162	140856	yes
14-158-1	-0.11	n.a.	123145	121790	yes
14-165-1	-0.149	n.a.	19731	18963	yes
14-172-1	-0.06	n.a.	171905	167492	yes
15-000-1	7.944	397.2	28777	20918	yes
15-006-1	30.463	1523.15	33101	24148	yes
15-014-1	76.799	3839.95	36065	22544	yes
15-021-1	28.84	1442	20315	14743	yes
15-035-1	35.389	1769.45	28335	18774	yes
15-050-1	8.55	427.5	35320	24552	yes
15-056-1	31.633	1581.65	47113	36983	yes
15-063-1	0.318	15.9	49160	48529	yes
15-069-1	0.213	10.65	64927	62434	yes
15-076-1	-0.174	n.a.	103867	91443	yes
16-000-1	12.236	611.8	61826	60655	yes
16-007-1	26.309	1315.45	59584	45264	yes
16-014-1	22.545	1127.25	54997	31107	yes
17-000-1	1.718	85.9	43489	36911	yes
17-006-1	7.225	361.25	49764	43008	yes
17-022-1	2.039	101.95	28879	28216	yes
17-027-1	0.214	10.7	38388	37555	yes
18-000-1	3.889	194.45	34658	31231	yes
18-005-1	4.84	242	49894	47722	yes
18-008-1	2.467	123.35	36436	35102	yes
18-013-1	1.769	88.45	29488	26731	yes
18-019-1	0.76	38	32272	26278	yes
18-027-1	1.562	78.1	25219	21712	yes
18-033-1	0.756	37.8	37083	34625	yes
18-040-1	3.657	182.85	38028	30102	yes
18-048-1	4.445	222.25	36928	32050	yes
18-061-1	8.071	403.55	69548	54878	yes
18-070-1	6.18	309	76523	60877	yes
18-077-1	2.53	126.5	63656	46594	yes
18-103-1	11.03	551.5	64439	58944	yes
18-110-1	7.602	380.1	95198	82682	yes
18-135-1	6.948	347.4	119499	73593	yes
18-142-1	35.019	1750.95	109323	79930	yes
18-147-1	-0.227	n.a.	69	n.a.	no
18-153-1	8.259	412.95	154336	138361	yes
19-000-1	56.497	2824.85	46780	18189	yes
19-003-1	18.18	909	53837	24773	yes
19-008-1	0.494	24.7	43751	26323	yes
19-014-1	0.961	48.05	60021	38900	yes
19-024-1	0.433	21.65	30674	27089	yes
19-029-1	0.944	47.2	52589	48682	yes
19-036-1	1.758	87.9	47769	46798	yes
19-042-1	1.418	70.9	36873	34093	yes
19-049-1	1.49	74.5	65602	59953	yes
19-064-1	11.688	584.4	73041	44369	yes
19-070-1	24.029	1201.45	90750	51649	yes
19-106-1	18.517	925.85	128933	85830	yes
19-113-1	13.57	678.5	113849	98621	yes
19-121-1	1.886	94.3	118435	117963	yes
19-127-1	0.859	42.95	140891	140412	yes
19-134-1	-0.162	n.a.	131620	131029	yes
19-141-1	7.823	391.15	119611	118883	yes
19-148-1	1.332	66.6	129955	119327	yes
19-155-1	0.033	1.65	175459	174416	yes
19-163-1	-0.191	n.a.	3429	1839	no
20-000-1	2.623	131.15	39893	21040	yes
20-005-1	8.864	443.2	34311	28581	yes
20-011-1	7.262	363.1	38506	27190	yes
20-019-1	9.705	485.25	36998	27297	yes
20-025-1	4.401	220.05	38535	33006	yes
20-034-1	89.994	4499.7	47328	39915	yes
20-041-1	54.551	2727.55	46301	32423	yes
21-000-1	31.897	1594.85	33736	20046	yes
21-006-1	8.75	437.5	33860	24301	yes
21-014-1	1.787	89.35	32888	23539	yes
21-023-1	5.015	250.75	32354	31738	yes
22-000-1	0.541	27.05	43688	37566	yes
22-012-1	2.094	104.7	39073	23566	yes
22-020-1	0.501	25.05	36601	34998	yes
22-048-1	-0.149	n.a.	71781	59842	yes
22-055-1	0.404	20.2	50467	46942	yes
22-062-1	0.341	17.05	85512	83547	yes
22-069-1	-0.1	n.a.	5927	5037	yes
23-000-1	5.815	290.75	27274	18297	yes
23-007-1	0.431	21.55	52913	41122	yes
23-013-1	0.236	11.8	45361	37050	yes
23-020-1	2.811	140.55	53078	30086	yes
23-030-1	0.701	35.05	52596	43509	yes
23-035-1	1.752	87.6	40665	24202	yes
23-038-1	0.258	12.9	56209	42334	yes
23-043-1	1.896	94.8	69997	49813	yes
23-059-1	0.87	43.5	82988	54900	yes
23-069-1	1.545	77.25	71441	44085	yes
23-078-1	-0.043	n.a.	81973	59432	yes
23-098-1	0.814	40.7	195388	122872	yes
23-105-1	0.212	10.6	137301	82514	yes
23-112-1	-0.141	n.a.	118489	108411	yes
23-134-1	5.197	259.85	194276	106943	yes
23-141-1	0.272	13.6	170528	127693	yes
23-147-1	0.13	6.5	207202	121821	yes
23-154-1	1.176	58.8	152566	99149	yes
24-000-1	3.181	159.05	11	n.a.	no
24-007-1	1.284	64.2	33496	32346	yes
24-013-1	0.337	16.85	15656	14865	yes
25-000-1	0.174	8.7	37727	34469	yes
25-007-1	0.678	33.9	50378	50080	yes
25-015-1	1.153	57.65	50016	49596	yes
25-021-1	0.468	23.4	46369	45605	yes
25-028-1	1.108	55.4	60932	59668	yes
25-036-1	3.3	165	75843	64344	yes
25-043-1	0.559	27.95	74662	72110	yes
25-050-1	0.654	32.7	74868	74473	yes
25-056-1	0.848	42.4	61909	61605	yes
25-070-1	2.188	109.4	137734	137262	yes
25-077-1	1.03	51.5	279263	274867	yes
25-084-1	0.247	12.35	3482	3259	yes
25-092-1	0.412	20.6	155666	154623	yes
25-098-1	0.017	0.85	5448	3963	yes
25-105-1	0.298	14.9	125550	125379	yes
25-116-1	-0.175	n.a.	152207	151548	yes
25-120-1	-0.187	n.a.	47337	46972	yes
25-127-1	-0.189	n.a.	188	n.a.	no
25-134-1	-0.191	n.a.	5444	3094	yes
25-141-1	-0.194	n.a.	30180	28093	yes
25-148-1	-0.184	n.a.	131785	127852	yes
25-155-1	2.805	140.25	670	n.a.	no
26-000-1	7.137	356.85	54384	30707	yes
26-008-1	3.978	198.9	41076	37578	yes
26-013-1	1.907	95.35	827	n.a.	no
26-020-1	1.715	85.75	73499	63868	yes
26-027-1	2	100	89283	86069	yes
26-034-1	2.454	122.7	67263	61251	yes
26-048-1	0.736	36.8	86916	76925	yes
26-055-1	3.305	165.25	73572	43042	yes
26-062-1	0.244	12.2	75179	65716	yes
26-098-1	51.125	2556.25	155666	103628	yes
26-104-1	-0.079	n.a.	116733	89190	yes
26-112-1	-0.222	n.a.	120562	116276	yes
26-118-1	-0.212	n.a.	22621	21652	yes
26-125-1	-0.173	n.a.	3710	3281	yes
26-132-1	-0.12	n.a.	13132	9749	yes
26-139-1	0.315	15.75	4481	2891	yes
27-000-1	21.059	1052.95	65560	34886	yes
27-008-1	4.721	236.05	68925	41861	yes
27-037-1	11.21	560.5	87223	63677	yes
27-044-1	0.057	2.85	87611	63761	yes
27-050-1	-0.177	n.a.	71660	66833	yes
27-058-1	20.67	1033.5	95386	94639	yes
27-077-1	77.445	3872.25	144962	95309	yes
27-081-1	8.797	439.85	127797	97164	yes
27-086-1	42.566	2128.3	124418	68208	yes
27-092-1	9.283	464.15	125360	102701	yes
27-155-1	0.058	2.9	204207	197441	yes
27-162-1	-0.208	n.a.	203353	201751	yes
28-000-1	30.459	1522.95	39699	24021	yes
28-006-1	6.234	311.7	57779	38320	yes
28-011-1	7.878	393.9	100714	63670	yes
28-019-1	6.399	319.95	63577	42886	yes
28-024-1	4.6	230	54165	38708	yes
28-032-1	4.601	230.05	103167	73754	yes
28-038-1	2.56	128	69618	53947	yes
28-045-1	-0.114	n.a.	66828	60068	yes
28-053-1	3.989	199.45	69611	55445	yes
28-077-1	5.526	276.3	114992	79048	yes
28-082-1	4.892	244.6	151299	109646	yes
28-085-1	4.136	206.8	105167	72764	yes
28-101-1	0.265	13.25	104635	77752	yes
28-109-1	-0.158	n.a.	157332	115845	yes
28-116-1	-0.088	n.a.	204151	151988	yes
28-122-1	-0.114	n.a.	167253	156046	yes
28-140-1	10.847	542.35	200440	184482	yes
28-146-1	-0.187	n.a.	184553	164112	yes
28-152-1	2.523	126.15	244551	239648	yes
29-000-1	10.761	538.05	65383	36805	yes
29-013-1	2.418	120.9	78647	34883	yes
29-027-1	5.598	279.9	79822	36777	yes
29-034-1	6.529	326.45	78499	35520	yes
29-048-1	15.547	777.35	127110	53357	yes
29-062-1	16.815	840.75	152325	69680	yes
29-076-1	3.698	184.9	122106	58394	yes
29-083-1	4.137	206.85	142545	61969	yes
29-097-1	1.948	97.4	192635	74430	yes
30-000-1	8.726	436.3	54105	32607	yes
30-007-1	5.817	290.85	70538	64032	yes
30-013-1	17.595	879.75	60530	52120	yes
30-019-1	3.096	154.8	73962	70165	yes
30-026-1	9.952	497.6	70359	50264	yes
30-036-1	1.078	53.9	89773	66872	yes
30-041-1	3.589	179.45	122958	87242	yes
30-048-1	10.884	544.2	151569	106620	yes
30-055-1	4.262	213.1	124585	93284	yes
30-063-1	3.259	162.95	103693	84551	yes
30-071-1	5.041	252.05	103726	80973	yes
30-076-1	5.703	285.15	238462	209022	yes
30-086-1	44.018	2200.9	147933	88819	yes
30-093-1	29.724	1486.2	192461	122070	yes
30-099-1	34.211	1710.55	218326	113330	yes
30-103-1	12.972	648.6	185154	113699	yes
30-107-1	0.105	5.25	248277	188734	yes
30-120-1	3.999	199.95	202928	149872	yes
30-126-1	1.649	82.45	213228	161225	yes
30-133-1	0.532	26.6	171254	120560	yes
30-139-1	2.014	100.7	151983	72760	yes
31-000-1	3.551	177.55	56435	42779	yes
31-006-1	21.622	1081.1	140963	106782	yes
31-013-1	8.114	405.7	91960	71095	yes
31-020-1	5.381	269.05	60276	51814	yes
31-027-1	3.367	168.35	74724	52475	yes
31-034-1	5.81	290.5	104476	83275	yes
31-041-1	9.067	453.35	184635	170059	yes
31-048-1	4.163	208.15	7595	5574	yes
31-062-1	0.607	30.35	164640	110823	yes
31-070-1	6.16	308	172173	114247	yes
31-077-1	3.716	185.8	137970	127640	yes
31-083-1	3.23	161.5	161130	107611	yes
31-098-1	3.96	198	213840	125528	yes
31-106-1	11.71	585.5	239520	132773	yes
31-112-1	-0.104	n.a.	210393	156345	yes
31-133-1	-0.052	n.a.	206475	147653	yes
32-000-1	-0.111	n.a.	118828	109155	yes
32-005-1	0.404	20.2	70237	69517	yes
32-012-1	-0.041	n.a.	9570	9125	yes
32-019-1	-0.1	n.a.	2787	2244	yes
32-026-1	1.597	79.85	50760	49650	yes
33-000-1	0.578	28.9	58699	56474	yes
33-007-1	1.274	63.7	77317	73845	yes
33-014-1	0.516	25.8	2686	1660	no
33-021-1	-0.212	n.a.	2386	896	no
34-000-1	3.912	195.6	65924	60818	yes
34-007-1	-0.147	n.a.	21	n.a.	no
34-014-1	0.012	0.6	19970	17905	yes
35-000-1	2.345	117.25	69987	38533	yes
35-005-1	3.498	174.9	52550	43902	yes
35-012-1	1.705	85.25	95861	67565	yes
35-020-1	1.74	87	135978	115165	yes
35-026-1	2.431	121.55	118782	108790	yes
35-033-1	0.762	38.1	116226	93813	yes
35-040-1	1.167	58.35	144192	135328	yes
35-048-1	5.838	291.9	108310	98179	yes
35-055-1	-0.143	n.a.	9424	8101	yes
36-000-1	1.89	94.5	50600	48801	yes
36-004-1	6.458	322.9	120785	119285	yes
36-011-1	4.025	201.25	154000	153226	yes
36-018-1	7.296	364.8	125806	119582	yes
37-000-1	8.608	430.4	101579	86350	yes
37-004-1	0.56	28	144971	139479	yes
37-011-1	-0.175	n.a.	118930	116543	yes
37-018-1	0.014	0.7	168166	165323	yes
37-025-1	-0.147	n.a.	35746	34428	yes
37-033-1	0.068	3.4	149967	136775	yes
38-000-1	1.256	62.8	140512	117651	yes
38-007-1	2.284	114.2	116956	105480	yes
38-014-1	-0.151	n.a.	22117	19880	yes
38-021-1	-0.161	n.a.	60599	59488	yes
38-042-1	-0.184	n.a.	10814	7147	yes
39-000-1	6.992	349.6	160573	90479	yes
39-008-1	11.726	586.3	133409	80584	yes
39-015-1	12.163	608.15	115392	71094	yes
39-020-1	4.736	236.8	153353	85849	yes
40-000-1	1.417	70.85	105504	86936	yes
40-006-1	-0.125	n.a.	87261	84466	yes
40-014-1	0.529	26.45	13796	5117	yes
40-021-1	-0.1	n.a.	2905	2466	yes
40-028-1	-0.025	n.a.	245013	240359	yes
40-035-1	0.038	1.9	203028	199894	yes
41-000-1	-0.222	n.a.	22369	21906	yes
41-005-1	4.173	208.65	154570	127959	yes
41-009-1	0.428	21.4	189996	150455	yes
41-013-1	3.122	156.1	178723	169784	yes
41-020-1	0.705	35.25	194511	173075	yes
41-028-1	-0.175	n.a.	218599	209637	yes
41-035-1	-0.203	n.a.	197074	186791	yes
41-041-1	-0.191	n.a.	125984	120755	yes
41-048-1	16.954	847.7	249858	245907	yes
42-000-1	70.164	3508.2	149	n.a.	no
42-006-1	19.913	995.65	234020	186031	yes
42-012-1	1.939	96.95	133088	122789	yes
42-019-1	5.08	254	45	n.a.	no
42-026-1	1.85	92.5	192	n.a.	no
42-032-1	4.491	224.55	124365	108077	yes
42-040-1	9.056	452.8	200650	148525	yes
42-047-1	58.082	2904.1	222458	170738	yes
